# Supplementary material for: A review of AI-based product shape generation technologies: trends, challenges, and future directions
Source: PeerJ journal article supplement (doi:10.7717/peerj-cs.3251), 2025-11-06
Supplement: Supplementary_document_1_StaffER.xlsx [file Supplementary_document_1_StaffER.xlsx]

## Sheet: Sheet1
year	WOS core set citation frequency	caption	Author Keywords.	Additional Keywords	periodicals	Author's acronym	mechanism	Country or area	Author's full name	WOS Category WC	Research Direction SC	Number of times used in the last 180 days	Number of uses from 2013 to date	Total frequency of citations	Number of pages in the paper	Number of references cited	date of publication	Funding organisations	corresponding author	communication agency	Country or area of communication	WOS number	DOI number	abstracts	first author	First author + title	serial number
2002	0	Evolvable Subsethood Product Fuzzy Neural Network For Pattern Classification	Fuzzy Neural Network;Mutual Subsethood;Fuzzy Inner Product;Real-Coded Ca;Pattern Classification	Rule Generation;Systems;Controllers;Design	International Journal Of Pattern Recognition And Artificial Intelligence	Velayutham, Cs;Kumar, S	Dayalbagh Educ Inst	India	Velayutham, Cs;Kumar, S	Computer Science, Artificial Intelligence	Computer Science	0	1	0	1	13	NOV	Missing Fields	Velayutham, Cs (Corresponding Author), Dayalbagh Educ Inst, Fac Sci, Dept Phys & Comp Sci, Dayalbagh 282005, Agra, India.			Wos:000179800300012	Missing Fields	this paper presents an evolvable version of a novel subsethood product fuzzy neural inference system (esupfunis). the original supfunis model(20) employs only fuzzy weights, and accepts both numeric and linguistic inputs. all numeric inputs are fuzzified using a feature specific fuzzifier. the model composes fuzzy signals from the input layer with fuzzy weights using a mutual subsethood measure. …	Velayutham, Cs	Velayutham, Cs;Evolvable Subsethood Product Fuzzy Neural Network For Pattern Classification	241
2003	13	A Methodology For Evolutionary Product Design	Evolutionary Design;Form;Function;Function-Form Mapping;Product Family;Product Information Management	System	Engineering With Computers	Tay, Feh;Gu, J	Natl Univ Singapore;Georgia Inst Technol	Usa;Singapore	Tay, Feh;Gu, J	Computer Science, Interdisciplinary Applications;Engineering, Mechanical	Computer Science;Engineering	0	3	15	3	33	Missing Fields	Missing Fields	Natl Univ Singapore, Dept Mech Engn, 10 Kent Ridge Crescent, Singapore 119260, Singapore.			Wos:000185800800008	10.1007/S00366-003-0261-3	this paper describes a function-based approach for conceptual design support in the context of evolutionary product development. the main objective is to improve a designer's productivity by the effective reuse of existing design information in design alternative identification, evaluation, and modification. an integrated evolutionary design methodology, epd, is presented. the proposed methodolog…	Tay, Feh	Tay, Feh;A Methodology For Evolutionary Product Design	84
2004	2	Development Of A Computer-Assisted Procedure For Car Style Design	Le Corbusier Modulus;Weighted Average Method;Semantic Differential Method;B-Spline Curve And Surface	Missing Fields	International Journal Of Vehicle Design	Lin, Mc;Yan, Ih	Natl Tsing Hua Univ;Natl Cheng Kung Univ	Taiwan	Lin, Mc;Yan, Ih	Engineering, Mechanical;Transportation Science & Technology	Engineering;Transportation	0	7	2	7	18	Missing Fields	Missing Fields	Lin, Mc (Corresponding Author), Natl Cheng Kung Univ, Coll Engn, Dept Ind Design, Tainan 701, Taiwan.			Wos:000224532000001	10.1504/Ijvd.2004.005240	the generation of curvilinear forms in product design is a very complicated activity. the purpose of this research is to develop a computer-assisted design procedure for the car style design to explore an efficient way in dealing with curvilinear surface products. during the development process, the le corbusier modulus in form principles is applied to design the component forms. the weighted ave…	Lin, Mc	Lin, Mc;Development Of A Computer-Assisted Procedure For Car Style Design	155
2004	9	Fuzzy Mapping Between Physical Domain And Function Domain In Design Process	Function Domain;Physical Domain;Fuzzy Mapping;Fuzzy Transition;Property Table	Features	International Journal Of Uncertainty Fuzziness And Knowledge-Based Systems	Gu, Yk;Huang, Hz	Dalian Univ Technol	Peoples R China	Gu, Yk;Huang, Hz	Computer Science, Artificial Intelligence	Computer Science	0	7	9	7	15	FEB	Missing Fields	Dalian Univ Technol, Sch Mech Engn, Dalian 116023, Liaonin, Peoples R China.			Wos:000220807100002	10.1142/S0218488504002618	the contents and meanings of mapping relationships between physical domain and function domain in different design stages, such as conceptual design, detail design and enhancement design, were analyzed. according to the analysis results, the fuzzy mapping between physical domain and function domain in different design stages was established by integrating objective information and subjective info…	Gu, Yk	Gu, Yk;Fuzzy Mapping Between Physical Domain And Function Domain In Design Process	113
2004	338	Modeling By Example	Databases Of Geometric Models;3D Shape Matching;Interactive Modeling Tools	Closed-Form Solution;Decomposition	Acm Transactions On Graphics	Funkhouser, T;Kazhdan, M;Shilane, P;Min, P;Kiefer, W;Tal, A;Rusinkiewicz, S;Dobkin, D	Univ Utrecht;Technion Israel Inst Technol;Princeton Univ	Usa;Netherlands;Israel	Funkhouser, T;Kazhdan, M;Shilane, P;Min, P;Kiefer, W;Tal, A;Rusinkiewicz, S;Dobkin, D	Computer Science, Software Engineering	Computer Science	0	17	438	17	38	AUG	Missing Fields	Princeton Univ, Princeton, Nj 08544 Usa.			Wos:000222972600059	10.1145/1015706.1015775	in this paper, we investigate a data-driven synthesis approach to constructing 3d geometric surface models. we provide methods with which a user can search a large database of 3d meshes to find parts of interest, cut the desired parts out of the meshes with intelligent scissoring, and composite them together in different ways to form new objects. the main benefit of this approach is that it is bo…	Funkhouser, T	Funkhouser, T;Modeling By Example	46
2004	2	Process Analysis In The Generation Of Product Modularization Based On Fuzzy Cluster	Missing Fields	Missing Fields	Proceedings Of The 8Th International Conference On Computer Supported Cooperative Work In Design, Vol 1	Wang, Hj;Zhang, Q;Yue, Tq	Dalian Univ Technol	Peoples R China	Wang, Hj;Zhang, Q;Yue, Tq	Computer Science, Artificial Intelligence;Computer Science, Hardware & Architecture;Computer Science, Software Engineering	Computer Science	0	6	2	6	8	Missing Fields	Missing Fields	Dalian Univ Technol, Sch Mech Engn, Dalian 116024, Peoples R China.			Wos:000222920200089	10.1109/Cacwd.2004.1349077	a product design method based on modularization is proposed during the course of mass customization, and a series of factors, which affect the interactive relationship of components as well as the generation of product in life cycle, are discussed. moreover by using fuzzy clustering algorithm the generated process of sequential clustering is also analyzed. a typical example is presented showing s…	Wang, Hj	Wang, Hj;Process Analysis In The Generation Of Product Modularization Based On Fuzzy Cluster	207
2004	15	Virtual Genes Of Manufacturing Products And Their Reforms For Product Innovative Design	Genetic Engineering;Gene Engineering;Product Innovation;Virtual Chromosome;Virtual Genes;Virtual Genome Map	Missing Fields	Proceedings Of The Institution Of Mechanical Engineers Part C-Journal Of Mechanical Engineering Science	Chen, Kz;Feng, Xa	Univ Hong Kong;Dalian Univ Technol	Peoples R China	Chen, Kz;Feng, Xa	Engineering, Mechanical	Engineering	0	14	17	14	19	MAY	Missing Fields	Chen, Kz (Corresponding Author), Univ Hong Kong, Dept Mech Engn, Pokfulam Rd, Hong Kong, Hong Kong, Peoples R China.			Wos:000222013000008	10.1243/095440604323052337	since the development of manufacturing products is very similar to the evolution of living beings, genetic engineering techniques have been applied by the present authors to develop a bionic design theory and methodology for product innovation. this design method is totally different from the conventional method and innovates products via the reform of virtual genes of products. it provides a log…	Chen, Kz	Chen, Kz;Virtual Genes Of Manufacturing Products And Their Reforms For Product Innovative Design	92
2005	3	Data Description Norm And Key Techniques Of Web-Based Parts Library	Plib;Data Description;Parts Information Sharing;Network-Data Driving	Missing Fields	Proceedings Of The Ninth International Conference On Computer Supported Cooperative Work In Design, Vols 1 And 2	Li, Yg;Lu, Y;Liao, Wh;Lin, Zk	Nanjing Univ Aeronaut & Astronaut	Peoples R China	Li, Yg;Lu, Y;Liao, Wh;Lin, Zk	Computer Science, Artificial Intelligence	Computer Science	0	1	3	1	8	Missing Fields	Missing Fields	Nanjing Univ Aeronaut & Astronaut, Coll Mech & Elect Engn, Nanjing 210016, Peoples R China.			Wos:000230443400046	10.1109/Cscwd.2005.194179	web-based parts library is important to collaborative design, concurrent engineering and supply chain management system. as common resources, web-based parts library should be integrated into different application systems of not only parts suppliers but also enterprises. other than research of product design, the research of web-based parts library pays more attention to previewing parts shape, a…	Li, Yg	Li, Yg;Data Description Norm And Key Techniques Of Web-Based Parts Library	20
2005	65	Design Of Robust New Products Under Variability: Marketing Meets Design	Missing Fields	Conjoint-Analysis;Genetic Algorithms;Operations;Patterns;Project	Journal Of Product Innovation Management	Luo, L;Kannan, Pk;Besharati, B;Azarm, S	Univ Maryland	Usa	Luo, L;Kannan, Pk;Besharati, B;Azarm, S	Business;Engineering, Industrial;Management	Business & Economics;Engineering	1	28	86	28	41	MAR	Missing Fields	Univ Maryland, Robert H Smith Sch Business, Fac Mkt, Dept Mkt, College Pk, Md 20742 Usa.			Wos:000227062900006	10.1111/J.0737-6782.2005.00113.X	in designing consumer durables such as appliances and power tools, it is important to account for variations in product performance across different usage situations and conditions. since the specific usage of the product and the usage conditions can vary, the resultant variations in product performance also can impact consumer preferences for the product. therefore, any new product that is desig…	Luo, L	Luo, L;Design Of Robust New Products Under Variability: Marketing Meets Design	226
2005	2	Haptic System For Shape Generation	Industrial Design;Product Design;Shape Modeling;Haptics;Skill Analysis	Missing Fields	Applications Of Digital Techniques In Industrial Design Engineering-Caid&Cd' 2005	Bordegoni, M;Cugini, U	Politecn Milan	Italy	Bordegoni, M;Cugini, U	Computer Science, Interdisciplinary Applications;Engineering, Industrial;Engineering, Manufacturing	Computer Science;Engineering	0	0	2	0	8	Missing Fields	Missing Fields	Politecn Milan, Dipartimento Meccan, Milan, Italy.			Wos:000231145000117	Missing Fields	the paper presents the first results of the eu funded research project t'nd - touch and design that aims at developing a system based on shape manipulators and haptic tools for the creation, modification and evaluation of product shapes. the system offers modeling functionalities that resemble the actions modelers perform when molding malleable material for creating physical prototypes of product…	Bordegoni, M	Bordegoni, M;Haptic System For Shape Generation	412
2005	0	Macroscopic Shape Feature On Products	Curve Design;Macroscopic Shape Feature;Shape Generation	Missing Fields	Applications Of Digital Techniques In Industrial Design Engineering-Caid&Cd' 2005	Ujiie, Y;Asanuma, T;Matsuoka, Y	Keio Univ	Japan	Ujiie, Y;Asanuma, T;Matsuoka, Y	Computer Science, Interdisciplinary Applications;Engineering, Industrial;Engineering, Manufacturing	Computer Science;Engineering	0	0	0	0	8	Missing Fields	Missing Fields	Ujiie, Y (Corresponding Author), Keio Univ, Grad Sch Sci & Technol, Tokyo 108, Japan.			Wos:000231145000051	Missing Fields	in curve design, the construction of method of representing macroscopic shape feature is important. the main reason for this appears to be that human being tends to perceive the overall shape feature macroscopically. however, representation of macroscopic shape feature in curved profiles is difficult using conventional microscopic shape information such as dimension and curvature. this paper desc…	Ujiie, Y	Ujiie, Y;Macroscopic Shape Feature On Products	407
2005	0	Plastic Product Evaluation Based On Mould Conceptual Design	Design Evaluation;Mould Conceptual Design;Parting Direction;Draft Angle;Product Undercut;Mould Layout Design	Missing Fields	Proceedings Of The Asme Design Engineering Division 2005, Pts A And B	Lu, Yq;Liu, Pl;Ding, Xm;Fu, Qr	Inst High Performance Comp	Singapore	Lu, Yiqiang;Liu, Peiling;Ding, Xiaomng;Fu, Qinrong	Engineering, Mechanical	Engineering	0	0	0	0	25	Missing Fields	Missing Fields	Lu, Yq (Corresponding Author), Inst High Performance Comp, 1 Sci Pk Rd 01-01 The Capricorn,Singapore Sci Pk, Singapore 117528, Singapore.			Wos:000241987200036	Missing Fields	severe competition in plastic product manufacturing industry is driving the product design toward first-part-correct. up to now, plastic product design is mainly evaluated by computer-aided-engineering packages to justify the plastic moulding processes including flow, packing and cooling. at the same time, product designers rely on their experience to justify the possibility of forming products, …	Lu, Yq	Lu, Yq;Plastic Product Evaluation Based On Mould Conceptual Design	83
2005	0	Representation Method Of Image And Function Of Product For Computer Aided Industrial Design	Industrial Design Process;Computational Model;Product Shape Image;Function;Topological Space;Phase Space	Missing Fields	Applications Of Digital Techniques In Industrial Design Engineering-Caid&Cd' 2005	Sakita, K	Soka Univ	Japan	Sakita, K	Computer Science, Interdisciplinary Applications;Engineering, Industrial;Engineering, Manufacturing	Computer Science;Engineering	0	0	0	0	9	Missing Fields	Missing Fields	Soka Univ, Fac Engn, Hachioji, Tokyo, Japan.			Wos:000231145000038	Missing Fields	in the early step of the industrial design, the given function of the designing product is the start point of imaging of the product shape. then, the industrial designer creates the alternatives and variations of shape images of the designing product. in order to assist the image generation and the image arrangement, the computational model of this industrial design process using the concepts of …	Sakita, K	Sakita, K;Representation Method Of Image And Function Of Product For Computer Aided Industrial Design	420
2005	61	Texture Design Using A Simplicial Complex Of Morphable Textures	Texture Synthesis;Data-Driven Models;Image Warping;Morphable Models	Image	Acm Transactions On Graphics	Matusik, W;Zwicker, M;Durand, F	Mit;Merl	Usa;Japan	Matusik, W;Zwicker, M;Durand, F	Computer Science, Software Engineering	Computer Science	0	5	77	5	40	JUL	Missing Fields	Merl, Tokyo, Japan.			Wos:000231223700049	10.1145/1073204.1073262	we present a system for designing novel textures in the space of textures induced by an input database. we capture the structure of the induced space by a simplicial complex where vertices of the simplices represent input textures. a user can generate new textures by interpolating within individual simplices. we propose a morphable interpolation for textures, which also defines a metric used to b…	Matusik, W	Matusik, W;Texture Design Using A Simplicial Complex Of Morphable Textures	140
2006	0	A Method To Generate Freeform Curves From A Hand-Drawn Sketch	Fair Curve Generation;Curvature;Hand-Dmwn Sketch;Image Processing;Principal Component Analysis;Bezier Curve;Least-Squares Method	Spline Curves;Curvature	Wmsci 2006: 10Th World Multi-Conference On Systemics, Cybernetics And Informatics, Vol Iii, Proceedings	Kuragano, T;Yamaguchi, A	Meisei Univ	Japan	Kuragano, Tetsuzo;Yamaguchi, Akira	Computer Science, Artificial Intelligence;Computer Science, Cybernetics;Computer Science, Information Systems	Computer Science	0	0	0	0	28	Missing Fields	Missing Fields	Kuragano, T (Corresponding Author), Meisei Univ, Grad Sch Informat Sci, 2-590 Nagabuchi, Ome City, Tokyo 1988655, Japan.			Wos:000251937300058	Missing Fields	when designers begin a product design, they create their ideas and expand them this process is performed on paper, and designers' hand-drawn lines are called sketches. if the designers' hand-drawn sketches can be realized as real curves it would be effective in shortening the design period. we have developed a method to extract five degree bezier curves based on a hand-drawn sketch. the basic tec…	Kuragano, T	Kuragano, T;A Method To Generate Freeform Curves From A Hand-Drawn Sketch	443
2006	2	Advanced Dfm Applications Using Design Based Metrology On Cd Sem	Missing Fields	Missing Fields	Metrology, Inspection, And Process Control For Microlithography Xx, Pts 1 And 2	Lorusso, Gf;Capodieci, L;Stoler, D;Schulz, B;Roling, S;Schramm, J;Tabery, C;Shah, K;Singh, B;Abbott, G;Roberts, A;Azordegan, A;Heinrichs, L;Kaliblotzky, Z;Castel, E	Adv Micro Devices Inc;Kla Tencor	Usa	Lorusso, G F;Capodieci, L;Stoler, D;Schulz, B;Roling, S;Schramm, J;Tabery, C;Shah, K;Singh, B;Abbott, G;Roberts, A;Azordegan, A;Heinrichs, L;Kaliblotzky, Z;Castel, E	Instruments & Instrumentation;Optics;Imaging Science & Photographic Technology	Instruments & Instrumentation;Optics;Imaging Science & Photographic Technology	0	1	2	1	1	Missing Fields	Missing Fields	Lorusso, Gf (Corresponding Author), Imec, B-3061 Leuven, Belgium.			Wos:000238252000011	10.1117/12.674776	design based metrology (dbm) implements a novel automation flow, which allows for a direct and traceable correspondence to be established between selected locations in product designs and matching metrology locations on silicon wafers. thus dbm constitutes the fundamental enabler of design for manufacturability (dfm), because of its intrinsic ability to characterize and quantify the discrepancy b…	Lorusso, Gf	Lorusso, Gf;Advanced Dfm Applications Using Design Based Metrology On Cd Sem	227
2006	3	Algorithm For Computer Aided Design Curve Shape Form Generation Of Knitting Patterns	Computer Graphics;Cad/Cam Systems;Bezier Curves;B-Splines;Ff Knitting Method	Missing Fields	2006 Ieee-Tttc International Conference On Automation, Quality And Testing, Robotics, Vol 1, Proceedings	Zaharieva-Stoyanova, E	Tech Univ Gabrovo	Bulgaria	Zaharieva-Stoyanova, Elena	Automation & Control Systems;Computer Science, Artificial Intelligence;Robotics	Automation & Control Systems;Computer Science;Robotics	0	1	3	1	11	Missing Fields	Missing Fields	Zaharieva-Stoyanova, E (Corresponding Author), Tech Univ Gabrovo, 4 H Dimirat Str, Gabrovo 5300, Bulgaria.			Wos:000241459500062	Missing Fields	the knitting industry cad/cam system's development needs a solution of some problems related to the computer representation of the designed objects. one of them is a generation of curve shape form knitting pattern and its transformation to knitting rows and stitches. this is an important problem for the ff knitting method because the knitted product's shape must be the same as the pattern's one. …	Zaharieva-Stoyanova, E	Zaharieva-Stoyanova, E;Algorithm For Computer Aided Design Curve Shape Form Generation Of Knitting Patterns	218
2006	1	Innovative Design Of The Seal Structure Of Butterfly Valve Based On Triz	Triz;Patterns And Lines Of Technology Evolution;Evolutionary Potential;Innovative Idea Generation;Butterfly Valve	Missing Fields	Knowledge Enterprise: Intelligent Strategies In Product Design, Manufacturing, And Management	Zhang, Jh;Tan, Rh;Jiang, P;Dai, Jl	Pharmaceut Res Inst;Hebei Univ Technol	Peoples R China	Zhang, Jianhui;Tan, Runhua;Jiang, Ping;Dai, Jinling	Engineering, Manufacturing	Engineering	0	5	1	5	5	Missing Fields	Natural Science Foundation Of China [50375045];Tianjin Natural Science Foundation [043802211]	Zhang, Jh (Corresponding Author), Hebei Univ Technol, Inst Design Innovat, Tianjin 300130, Peoples R China.			Wos:000238318500061	Missing Fields	innovative ideas generation is a key step in the innovative design of the products. computer-aided innovation (cai) systems based on triz (theory of inventive problem solving) support new ideas generation of innovation. the patterns and lines of technology evolution in triz provide a powerful structured methodology for a directed development of new products. the concept of 'evolutionary potential…	Zhang, Jh	Zhang, Jh;Innovative Design Of The Seal Structure Of Butterfly Valve Based On Triz	205
2006	25	Mapping Product Design Specification For Mass Customization	Product Design;Product Family;Customizable Designs;Mass Customization;Design Customization Index;Adaptive Design Customization	Missing Fields	Journal Of Intelligent Manufacturing	Krishnapillai, R;Zeid, A	Northeastern Univ	Usa	Krishnapillai, R;Zeid, A	Computer Science, Artificial Intelligence;Engineering, Manufacturing	Computer Science;Engineering	0	23	31	23	9	FEB	Missing Fields	Northeastern Univ, Dept Mech & Ind Engn, 325 Snell Engn Ctr, Boston, Ma 02115 Usa.			Wos:000234688100003	10.1007/S10845-005-5511-3	mass customization is an emerging field in manufacturing research community where customer satisfaction is achieved by complying with exact customer requirements at mass production efficiencies. product varieties have mostly failed in the aspect of satisfying customer requirements, since knowing beforehand exactly what customer needs is beyond the scope of any manufacturing or marketing paradigm.…	Krishnapillai, R	Krishnapillai, R;Mapping Product Design Specification For Mass Customization	70
2006	0	Multilevel Hierarchical Decomposition: Identification Procedures For Edge Of Design Space Feasibility	Missing Fields	Optimization	Proceedings Of The Asme Turbo Expo 2006, Vol 6, Pts A And B	Nagendra, S;Midgley, J;Staubach, Jb	United Technol Corp	Usa	Nagendra, Somanath;Midgley, Jeff;Staubach, Joseph B	Engineering, Mechanical	Engineering	0	0	0	0	13	Missing Fields	Missing Fields	Nagendra, S (Corresponding Author), United Technol Corp, Pratt & Whitney Engines Div, Adv Engine Programs, Syst Optimizat, E Hartford, Ct 06108 Usa.			Wos:000242494000121	Missing Fields	problems with known regions of feasibility and infeasibility. the edge of feasibility is determined and the functional in high performance machines, multiple active mdo constraints dictate the edge of feasibility, i.e. boundary of the design space. it is essential to have an accurate description of the boundary in terms of design variables. given a sample of data, the recognition of a design feat…	Nagendra, S	Nagendra, S;Multilevel Hierarchical Decomposition: Identification Procedures For Edge Of Design Space Feasibility	49
2006	0	Research On The Collaborative Development Chains For Manufacturing Enterprise Based On Product Platform	Product Platform;Product Collaborative Development;Mapping;Manufacturing Enterprise	Early Supplier Involvement;Design	Wcica 2006: Sixth World Congress On Intelligent Control And Automation, Vols 1-12, Conference Proceedings	Hou, L;Han, Dh;Wen, Zj	Xiamen Univ	Peoples R China	Hou, Liang;Han, Donghui;Wen, Zhijia	Automation & Control Systems;Computer Science, Artificial Intelligence	Automation & Control Systems;Computer Science	0	1	0	1	3	Missing Fields	Missing Fields	Hou, L (Corresponding Author), Xiamen Univ, Dept Mech & Elect Engn, Xiamen 361005, Peoples R China.			Wos:000241773207131	Missing Fields	with the increase of enterprise external-cooperation activity, product development has no longer been limited in one enterprise. optimizing, integrating and utilizing various resources from inner and outer enterprise have become the key factors of product development. firstly, the definition of the product collaborative development chains (pcdc) is presented, and the characteristics, requirements…	Hou, L	Hou, L;Research On The Collaborative Development Chains For Manufacturing Enterprise Based On Product Platform	116
2006	0	Scenario-Based Design Knowledge Acquiring And Application In Collaborative Product Design	Design Scenario;Knowledge Acquiring;Collaborative Product Design;Cognitive Experiment;Case-Based Reasoning	Missing Fields	2006 10Th International Conference On Computer Supported Cooperative Work In Design, Proceedings, Vols 1 And 2	Tan, H;Zhao, Jh;Zhang, J	Hunan Univ;Key Lab Adv Technol	Peoples R China	Tan, Hao;Zhao, Jianghong;Zhang, Jun	Computer Science, Artificial Intelligence;Computer Science, Information Systems;Computer Science, Interdisciplinary Applications;Computer Science, Software Engineering	Computer Science	0	1	0	1	19	Missing Fields	National High Technology Research And Development Program Of China [2004Aa424530];China Key Technologies R D Programmer [2001Ba203B13-03]	Tan, H (Corresponding Author), Hunan Univ, Sch Design, Changsha, Peoples R China.			Wos:000241246300061	Missing Fields	collaborative product design is a problem-solving process where designers' knowledge and expertise are always tactic and implicit, in the area of which knowledge acquiring is the difficult problem. this paper depicts the concept of design scenario and the process and pattern of design knowledge acquiring in a cognitive approach. through a scenario-based collaborative product design cognitive expe…	Tan, H	Tan, H;Scenario-Based Design Knowledge Acquiring And Application In Collaborative Product Design	333
2006	24	Shape Exploration Of Designs In A Style: Toward Generation Of Product Designs	Decomposition;Exploration;Product Design;Shape Rule;Structure	Grammar;Language	Ai Edam-Artificial Intelligence For Engineering Design Analysis And Manufacturing	Prats, M;Earl, C;Garner, S;Jowers, I	Open Univ	England	Prats, M;Earl, C;Garner, S;Jowers, I	Computer Science, Artificial Intelligence;Computer Science, Interdisciplinary Applications;Engineering, Multidisciplinary;Engineering, Manufacturing	Computer Science;Engineering	7	32	30	32	34	SUM	Missing Fields	Prats, M (Corresponding Author), Open Univ, Dept Design & Innovat, Milton Keynes Mk7 6Aa, Bucks, England.			Wos:000239017600004	10.1017/S0890060406060173	generative specifications have been used to systematically codify established styles in several design fields including architecture and product design. we examine how designers explore new designs in the early stages of product development as they manipulate and interpret shape representations. a model of exploration is proposed with four types of shape descriptions (contour, decomposition, stru…	Prats, M	Prats, M;Shape Exploration Of Designs In A Style: Toward Generation Of Product Designs	158
2007	7	A Rule Based Assembly Sequence Generation Method For Product Design	Product Design;Assembly Sequence;Contact Relation Matrix;Matrix Representation.	Missing Fields	Concurrent Engineering-Research And Applications	Lin, Mc;Tai, Yy;Chen, Ms;Chang, Ca	Univ Missouri;Natl Cheng Kung Univ	Usa;Taiwan	Lin, Ming-Chyuan;Tai, Yuan-Yeuan;Chen, Ming-Shi;Chang, C Alec	Computer Science, Interdisciplinary Applications;Engineering, Manufacturing;Operations Research & Management Science	Computer Science;Engineering;Operations Research & Management Science	0	16	8	16	21	SEP	Missing Fields	Lin, Mc (Corresponding Author), Natl Cheng Kung Univ, Coll Planning & Design, Dept Ind Engn, Tainan 701, Taiwan.			Wos:000250379800004	10.1177/1063293X07083084	in concurrent engineering, the integration of the designers' knowledge and experience, and computer technology into the design process is very important to improve design quality and production efficiency. a feasible design alternative that follows the design rules for assembly will make product manufacturing and assembly more successful. however, designers seldom consider assembly problems in th…	Lin, Mc	Lin, Mc;A Rule Based Assembly Sequence Generation Method For Product Design	178
2007	7	Analysis And Design Methodology For Recognizing Opportunities And Difficulties For Product-Based Services	Missing Fields	Missing Fields	Picmet '07: Portland International Center For Management Of Engineering And Technology, Vols 1-6, Proceedings: Management Of Converging Technologies	Uchihira, N;Kyoya, Y;Kim, Sk;Maeda, K;Ozawa, M;Ishii, K			Uchihira, Naoshi;Kyoya, Yuji;Kim, Sun K;Maeda, Katsuhiro;Ozawa, Masanori;Ishii, Kosuke	Engineering, Manufacturing;Management;Operations Research & Management Science	Engineering;Business & Economics;Operations Research & Management Science	0	6	7	6	14	Missing Fields	Missing Fields				Wos:000257655901123	10.1109/Picmet.2007.4349613	recently, manufacturing companies have been moving into product-based service businesses in addition to providing the products themselves. however, it is not easy for engineers in manufacturing companies to create new service businesses because their skills, mental models, design processes, and organization are optimized for product design and not for service design. in order to design product-ba…	Uchihira, N	Uchihira, N;Analysis And Design Methodology For Recognizing Opportunities And Difficulties For Product-Based Services	206
2007	0	Scenario-Based Design Knowledge Acquiring And Modeling In Collaborative Product Design	Missing Fields	Missing Fields	Computer Supported Cooperative Work In Design Iii	Tan, H;Zhao, J	Hunan Univ	Peoples R China	Tan, Hao;Zhao, Jianghong	Computer Science, Interdisciplinary Applications;Computer Science, Theory & Methods	Computer Science	0	1	0	1	19	Missing Fields	National Basic Research Program Of China [2004Cb719401];Key Project Of National Science Foundation Of China [60635020]	Tan, H (Corresponding Author), Hunan Univ, State Key Lab Adv Design & Manufacture Vehicle Bo, Changsha 410082, Peoples R China.			Wos:000248528400014	Missing Fields	collaborative product design is a typical complex problem-solving process where designers' knowledge and expertise are always tactic and implicit. this paper depicts the concept of design scenario and the scenario-based design knowledge acquiring in a cognitive approach. through a cognitive experiment based on protocol analysis and sketch analysis in terms of scenario-based collaborative product …	Tan, H	Tan, H;Scenario-Based Design Knowledge Acquiring And Modeling In Collaborative Product Design	348
2007	3	Twelve Design Patterns For Integrating And Normalizing Product Model Schemas	Missing Fields	Missing Fields	Computer-Aided Civil And Infrastructure Engineering	Lee, G;Eastman, Cm;Sacks, R	Technion Israel Inst Technol;Georgia Inst Technol;Yonsei Univ	Usa;South Korea;Israel	Lee, Ghang;Eastman, Charles M;Sacks, Rafael	Computer Science, Interdisciplinary Applications;Construction & Building Technology;Engineering, Civil;Transportation Science & Technology	Computer Science;Construction & Building Technology;Engineering;Transportation	0	4	4	4	33	APR	Missing Fields	Lee, G (Corresponding Author), Yonsei Univ, Dept Architectural Engn, Seoul, South Korea.			Wos:000243910400001	10.1111/J.1467-8667.2007.00475.X	this article reviews a method for generating a product model from user data and introduces 12 design patterns for resolving conflicts that may occur in the integration and normalization process. the generating method and design patterns were evaluated during a project to integrate the product models collected from three different precast concrete companies in the united states, testing the new me…	Lee, G	Lee, G;Twelve Design Patterns For Integrating And Normalizing Product Model Schemas	196
2008	10	A Methodology For Creating A Statistically Derived Shape Grammar Composed Of Non-Obvious Shape Chunks	Vehicle Design;Design Language;Principal Component Analysis;Shape Grammar	Missing Fields	Research In Engineering Design	Orsborn, S;Cagan, J;Boatwright, P	Carnegie Mellon Univ	Usa	Orsborn, Seth;Cagan, Jonathan;Boatwright, Peter	Engineering, Multidisciplinary;Engineering, Industrial;Engineering, Manufacturing	Engineering	1	14	12	14	5	JAN	Missing Fields	Cagan, J (Corresponding Author), Carnegie Mellon Univ, Dept Mech Engn, Scaife Hall,5000 Forbes Ave, Pittsburgh, Pa 15213 Usa.			Wos:000252770300003	10.1007/S00163-007-0035-9	a shape grammar is a production system that can be used to create new product designs. traditionally, a product shape grammar's rules are created by a skilled person that understands the language of the design. in this paper the results of a principal component analysis of vehicles are used to create a vehicle shape grammar by basing the rules upon the determined shape relationships. the advantag…	Orsborn, S	Orsborn, S;A Methodology For Creating A Statistically Derived Shape Grammar Composed Of Non-Obvious Shape Chunks	422
2008	4	Computer Aided Design: An Early Shape Synthesis System	Shape Synthesis;Shape Grammar;Computer Vision;Sub-Shape Detection	Missing Fields	Global Design To Gain A Competitive Edge: An Holistic And Collaborative Design Approach Based On Computational Tools	Mckay, A;Jowers, L;Chan, Hh;De Pennington, A;Hogg, Dc	Univ Leeds	England	Mckay, Alison;Jowers, Lestyn;Chan, Hau Hing;De Pennington, Alan;Hogg, David C	Engineering, Manufacturing;Engineering, Mechanical	Engineering	0	1	4	1	9	Missing Fields	Missing Fields	Mckay, A (Corresponding Author), Univ Leeds, Leeds Ls2 9Jt, W Yorkshire, England.			Wos:000259477800001	10.1007/978-1-84800-239-5_1	today's computer aided design systems enable the creation of digital product definitions that are widely used throughout the design process, for example in analysis or manufacturing. typically, such product definitions are created after the bulk of [shape] designing has been completed because their creation requires a detailed knowledge of the shape that is to be defined. consequently, there is a…	Mckay, A	Mckay, A;Computer Aided Design: An Early Shape Synthesis System	185
2008	0	Development Of Texture Design System Using Fractal And 1/F Fluctuation	Missing Fields	Generation;Geometry	27Th Computers And Information In Engineering Conference, Vol 2, Pts A And B 2007: Proceedings Of The Asme International Design Engineering Technical Conferences And Computers And Information In Engineering Conference	Nakatsuka, S;Aoyama, H	Keio Univ	Japan	Nakatsuka, Satoshi;Aoyama, Hideki	Computer Science, Interdisciplinary Applications;Engineering, Mechanical	Computer Science;Engineering	0	0	0	0	14	Missing Fields	Missing Fields	Nakatsuka, S (Corresponding Author), Keio Univ, Lab Digital Design & Digital Mfg, Dept Syst Design Engn, Kanagawa 2238522, Japan.			Wos:000254279300033	Missing Fields	to enhance product added-value, there is an increasing trend recently to print wood grain patterns or give texture to building materials and industrial products by surface treatment. surface treatment is not only applied for decorative purposes but it also serves practical purposes such as hiding surface damage and uneven coating invisible. the methods of designing wood grain and texture on surfa…	Nakatsuka, S	Nakatsuka, S;Development Of Texture Design System Using Fractal And 1/F Fluctuation	228
2008	0	Emotional Shape Generation System With Exchange Of Others' Viewpoints For Externalizing Customers' Latent Sensitivity	Latent Kansei;Emotional Quality;Shape Generation;Exchanging Viewpoints;Unpredicted Viewpoint	Design	27Th Computers And Information In Engineering Conference, Vol 2, Pts A And B 2007: Proceedings Of The Asme International Design Engineering Technical Conferences And Computers And Information In Engineering Conference	Yanagisawa, H;Murakami, T	Univ Tokyo	Japan	Yanagisawa, Hideyoshi;Murakami, Tamotsu	Computer Science, Interdisciplinary Applications;Engineering, Mechanical	Computer Science;Engineering	0	1	0	1	17	Missing Fields	Missing Fields	Yanagisawa, H (Corresponding Author), Univ Tokyo, Sch Engn, Dept Engn Synth, Bunkyo Ku, 7-3-1 Hongo, Tokyo, Japan.			Wos:000254279300050	Missing Fields	the aesthetics of a product's shape has become an important factor to increase the value of mature products. however, such emotional quality regarding the customer's need is difficult to capture due to its subjectivity. to address this issue, we have previously proposed shape generation methods that help the customers to externalize their image of product aesthetics into a shape. the previous met…	Yanagisawa, H	Yanagisawa, H;Emotional Shape Generation System With Exchange Of Others' Viewpoints For Externalizing Customers' Latent Sensitivity	219
2008	3	Research On Product Image Styling Design Method Based On Neural Network And Genetic Algorithm	Missing Fields	Missing Fields	Icnc 2008: Fourth International Conference On Natural Computation, Vol 5, Proceedings	Su, Jn;Jiang, Yh;Wang, P	Logist Engn Univ Pla;Lanzhou Univ Technol	Peoples R China	Su, Jianning;Jiang, Yuhong;Wang, Peng	Computer Science, Artificial Intelligence;Computer Science, Interdisciplinary Applications;Computer Science, Software Engineering;Engineering, Biomedical;Mathematical & Computational Biology;Telecommunications	Computer Science;Engineering;Mathematical & Computational Biology;Telecommunications	0	16	3	16	8	Missing Fields	Missing Fields	Su, Jn (Corresponding Author), Lanzhou Univ Technol, Coll Design Art, Lanzhou 730050, Peoples R China.			Wos:000264556100122	10.1109/Icnc.2008.129	on the study of kansei engineering and product image evaluation, a product image styling design method based on neural network and genetic algorithm is presented. firstly, according to the findings of kansei image, image evaluating pattern with neural network is constructed; and then, according to consumers' kansei image demands and cooperated with evaluating pattern of neural network as genetic …	Su, Jn	Su, Jn;Research On Product Image Styling Design Method Based On Neural Network And Genetic Algorithm	154
2009	2	Conceptual Model And Evaluation Of Design Characteristics In Product Development	Conceptual Design;Evaluation Model;Product Development;Theory Of Design	Missing Fields	Strojarstvo	Ivandic, Z;Ergic, T;Kokanovic, M	Jj Strossmayer Univ Osijek	Croatia	Ivandic, Zeljko;Ergic, Todor;Kokanovic, Mato	Engineering, Mechanical	Engineering	0	6	3	6	11	JUL-AUG	Missing Fields	Ivandic, Z (Corresponding Author), Jj Strossmayer Univ Osijek, Fac Mech Engn, Trg Ivane Brlic Mazuranic 2, Hr-35000 Slavonski Brod, Croatia.			Wos:000273410400004	Missing Fields	the paper presents an original model of evaluation in the design process, especially developed model transformation features in the conceptual design by an approach for establishing effective mapping and transformation process between product properties and domain requirements from different domains. model transformation feature in the conceptual process of designing and the valuation model featu…	Ivandic, Z	Ivandic, Z;Conceptual Model And Evaluation Of Design Characteristics In Product Development	102
2009	19	Data-Driven Curvature For Real-Time Line Drawing Of Dynamic Scenes	Algorithms;Design;Real-Time Curvature;Real-Time Line Drawing;Real-Time Nonphotorealistic Rendering For Deforming Objects;Data-Driven Curvature;Independent Component Analysis (Ica);Neural Network Regression	Missing Fields	Acm Transactions On Graphics	Kalogerakis, E;Nowrouzezahrai, D;Simari, P;Mccrae, J;Hertzmann, A;Singh, K	Univ Toronto	Canada	Kalogerakis, Evangelos;Nowrouzezahrai, Derek;Simari, Patricio;Mccrae, James;Hertzmann, Aaron;Singh, Karan	Computer Science, Software Engineering	Computer Science	0	6	22	6	50	JAN	Alfred P. Sloan Foundation;Canada Foundation For Innovation (Cfi);Canadian Institute For Advanced Research (Cifar);Microsoft Research, The National Sciences And Engineering Research Council Of Canada (Nserc);Ontario Ministry Of Research And Innovation (Mri);Ontario Ministry Of Education And Training;Canadian Research Network For Mathematics Of Information Technology And Complex Systems (Mitacs)	Kalogerakis, E (Corresponding Author), Univ Toronto, Dept Comp Sci, 10 Kings Coll Rd,Room 3302, Toronto, On M5S 3G4, Canada.			Wos:000263565100011	10.1145/1477926.1477937	this article presents a method for real-time line drawing of deforming objects. object-space line drawing algorithms for many types of curves, including suggestive contours, highlights, ridges, and valleys, rely on surface curvature and curvature derivatives. unfortunately, these curvatures and their derivatives cannot be computed in real-time for animated, deforming objects. in a preprocessing s…	Kalogerakis, E	Kalogerakis, E;Data-Driven Curvature For Real-Time Line Drawing Of Dynamic Scenes	392
2009	48	Data-Driven Decision Tree Classification For Product Portfolio Design Optimization	Missing Fields	Quality Function Deployment;Conjoint-Analysis;Commonality;Methodology	Journal Of Computing And Information Science In Engineering	Tucker, Cs;Kim, Hm	Univ Illinois	Usa	Tucker, Conrad S;Kim, Harrison M	Computer Science, Interdisciplinary Applications;Engineering, Manufacturing	Computer Science;Engineering	1	47	56	47	58	DEC	Missing Fields	Kim, Hm (Corresponding Author), Univ Illinois, Dept Ind & Enterprise Syst Engn, 104 S Mathews Ave, Urbana, Il 61801 Usa.			Wos:000272157300004	10.1115/1.3243634	the formulation of a product portfolio requires extensive knowledge about the product market space and also the technical limitations of a company's engineering design and manufacturing processes. a design methodology is presented that significantly enhances the product portfolio design process by eliminating the need for an exhaustive search of all possible product concepts. this is achieved thr…	Tucker, Cs	Tucker, Cs;Data-Driven Decision Tree Classification For Product Portfolio Design Optimization	324
2009	0	Factors Affecting Viewpoint Shifts When Evaluating Shape Aesthetics Towards Extracting Customer'S Latent Needs Of Emotional Quality	Emotional Quality;Latent Sensitivity;Shape Aesthetics;Shifting Viewpoints;Exchanging Viewpoints	Design	Detc 2008: Proceedings Of The Asme International Design Engineering Technical Conferences And Computers And Informational In Engineering Conference, Vol 3, Pts A And B: 28Th Computers And Information In Engineering Conference	Yanagisawa, H;Murakami, T	Univ Tokyo	Japan	Yanagisawa, Hideyoshi;Murakami, Tamotsu	Computer Science, Information Systems;Computer Science, Software Engineering;Computer Science, Theory & Methods;Engineering, Mechanical	Computer Science;Engineering	0	1	0	1	18	Missing Fields	Missing Fields	Yanagisawa, H (Corresponding Author), Univ Tokyo, Sch Engn, Dept Engn Synth, Bunkyo Ku, 7-3-1 Hongo, Tokyo, Japan.			Wos:000263939600079	Missing Fields	there are three main issues when trying to capture the customer's need for a product's emotional quality such as its aesthetics. the first is that customers have difficulty externalizing their emotional needs even if they have a clear mental image of those needs. the second is that people have different sensitivities when perceiving emotional qualities. the third is that customers have a latent s…	Yanagisawa, H	Yanagisawa, H;Factors Affecting Viewpoint Shifts When Evaluating Shape Aesthetics Towards Extracting Customer'S Latent Needs Of Emotional Quality	247
2009	26	General Shape Grammar Interpreter For Intelligent Designs Generations	Shape Grammars;Electronic Institution;Virtual World;3D;Interpreter	Language	Proceedings Of The 2009 Sixth International Conference On Computer Graphics, Imaging And Visualization	Trescak, T;Rodriguez, I;Esteva, M	Spanish Council Sci Res;Univ Barcelona	Spain	Trescak, T;Rodriguez, I;Esteva, M	Computer Science, Artificial Intelligence;Computer Science, Software Engineering;Imaging Science & Photographic Technology	Computer Science;Imaging Science & Photographic Technology	0	8	31	8	22	Missing Fields	Iea [Tin2006-15662-C02-01];At Consolider [Csd2007-0022];Generalitat De Catalunya [2005-Sgr-00093]	Trescak, T (Corresponding Author), Spanish Council Sci Res, Artificial Intelligence Res Inst, Barcelona, Spain.			Wos:000275127400039	10.1109/Cgiv.2009.74	shape grammars play an important role in a new generation of tools for the analysis and design of products. in this work we present a general tool named shape grammar interpreter (sgi) for the automatic generation of designs. the developed shape grammar framework allows designers to obtain automatically generated designs and to participate in the design process. in that way the generated design c…	Trescak, T	Trescak, T;General Shape Grammar Interpreter For Intelligent Designs Generations	416
2009	1	Generative Design And Cnc Fabrication Using Shape Grammars	Generative Design;Generative Fabrication;Shape Grammars;Cad/Cam;Capp	Manufacturing Systems;Operations;Language	Detc 2008: Proceedings Of The Asme International Design Engineering Technical Conferences And Computers And Information In Engineering Conference, Vol 1, Pts A And B: 34Th Design Automation Conference	Ertelt, C;Shea, K	Tech Univ Munich	Germany	Ertelt, Christoph;Shea, Kristina	Engineering, Industrial;Engineering, Mechanical	Engineering	0	7	1	7	28	Missing Fields	Missing Fields	Ertelt, C (Corresponding Author), Tech Univ Munich, Inst Prod Dev, Fac Mech Engn, Boltzmannstr 15, D-85748 Garching, Germany.			Wos:000264180000003	Missing Fields	generative design and fabrication refers to the ability to autonomously generate designs while simultaneously generating all information to directly fabricate them. this technique is driven by the increasing need to rapidly and flexibly fabricate customized parts and individually designed products. for the automation of the design-to-fabrication process chain, intensive and dynamically updated kn…	Ertelt, C	Ertelt, C;Generative Design And Cnc Fabrication Using Shape Grammars	138
2009	0	Ontology-Based Product Information Modeling Of Conceptual Design	Product Information Modeling;Conceptual Design;Ontology;Owl	Missing Fields	Ecbi: 2009 International Conference On Electronic Commerce And Business Intelligence, Proceedings	Wang, Yy	Nanchang Hangkong Univ	Peoples R China	Wang Youyuan	Business;Computer Science, Information Systems;Economics;Management	Business & Economics;Computer Science	0	4	1	4	10	Missing Fields	Missing Fields				Wos:000272586700013	10.1109/Ecbi.2009.118	the essay offers product information model based on ontology of conceptual design. it studies concrete content and expression methods of non-geometry, geometry and flies relationship information. use the model of f-b-s (function-behavior-structure) to express non-geometry information. describe geometry information of conceptual design in a formalization express modeling language, realize mapping …	Wang, Yy	Wang, Yy;Ontology-Based Product Information Modeling Of Conceptual Design	89
2009	1	Product Innovative Design Framework Based On Triz/Fes	Function-Effect-Structure Framework;Innovative Design;Ideal Solution;Conflict Resolving	Missing Fields	2009 Ieee 10Th International Conference On Computer-Aided Industrial Design & Conceptual Design, Vols 1-3: E-Business, Creative Design, Manufacturing - Caid&Cd'2009	Zhang, Fy;Wang, P;Lu, Xm;Liu, H	Tianjin Univ Sci & Technol China	Peoples R China	Zhang, Fuying;Wang, Ping;Lu, Ximei;Liu, Hui	Computer Science, Interdisciplinary Applications;Engineering, Manufacturing	Computer Science;Engineering	0	2	1	2	8	Missing Fields	Missing Fields	Zhang, Fy (Corresponding Author), Tianjin Univ Sci & Technol China, Dept Mech Engn, Tianjin 300222, Peoples R China.			Wos:000275947300499	Missing Fields	defining and resolving design conflicts are the most important aspect of product innovative design. triz provides theories, methods and tools for resolving design conflicts, but is scarce in identifying conflicts. function-effect-structure (fes) framework constructed for representing the connections of design object is an effective problems analysis way in product design. this paper presents a pr…	Zhang, Fy	Zhang, Fy;Product Innovative Design Framework Based On Triz/Fes	106
2009	3	Research On Conceptual Design Automation Of Mechanical Products -Based On Functional Mode	Conceptual Design;Functional Surface;Functional Mode;Decomposition And Reconstruction	Missing Fields	Icicta: 2009 Second International Conference On Intelligent Computation Technology And Automation, Vol Ii, Proceedings	Li, Pg;Feng, Xy;Zhao, Sc;Huang, Kz	Shandong Univ	Peoples R China	Li, Peigang;Feng, Xianying;Zhao, Shu-Chun;Huang, Kezheng	Automation & Control Systems;Computer Science, Artificial Intelligence;Engineering, Electrical & Electronic	Automation & Control Systems;Computer Science;Engineering	0	5	3	5	10	Missing Fields	Missing Fields	Li, Pg (Corresponding Author), Shandong Univ, Sch Mech Engn, Jinan 250100, Peoples R China.			Wos:000275862100218	10.1109/Icicta.2009.452	at the stage of conceptual design of mechanical products, there are some multiple solutions and uncertainty problems in the process of mapping function to structure. in order to tackle these problems, limit nature of rigid body in the general coordinate system was analyzed and based on the decomposition and reconfiguration theory, conceptual design model of function-functional mode-structure was …	Li, Pg	Li, Pg;Research On Conceptual Design Automation Of Mechanical Products -Based On Functional Mode	124
2009	1	Research On Product Information Model For Collaborative Design	Ajax;Collaborative Design;Information Interaction;Product Information Model	Missing Fields	2009 Ieee 16Th International Conference On Industrial Engineering And Engineering Management, Vols 1 And 2, Proceedings	Xu, Q;Zhang, Gq;Huang, Xl	Taizhou Vocat & Tech Coll	Peoples R China	Xu, Qi;Zhang, Guoqing;Huang, Xiaoliang	Engineering, Industrial;Operations Research & Management Science	Engineering;Operations Research & Management Science	0	2	1	2	10	Missing Fields	Missing Fields	Xu, Q (Corresponding Author), Taizhou Vocat & Tech Coll, Dept Mech Engn, Taizhou, Zhejiang, Peoples R China.			Wos:000276840700384	10.1109/Icieem.2009.5344291	a three-layer structural product information model is put forward. the information interaction of each layer is researched. in data layer, model-driven mapping method is adopted. the bidirectional data mapping mechanism is set up between xml and database using javabean object as the middleware. in logic layer, the paper uses product structure tree to take organization and management on components…	Xu, Q	Xu, Q;Research On Product Information Model For Collaborative Design	82
2009	0	Theoretical Research On Design Dna Based On Stylistic Feature In Industrial Design	Stylistic Features;Design Dna;Inheritance;Variation;Operative Mechanism	Missing Fields	2009 Ieee 10Th International Conference On Computer-Aided Industrial Design & Conceptual Design, Vols 1-3: E-Business, Creative Design, Manufacturing - Caid&Cd'2009	Lu, Zl;Tang, Wc;Xue, Cq	Southeast Univ	Peoples R China	Lu, Zhaolin;Tang, Wencheng;Xue, Chengqi	Computer Science, Interdisciplinary Applications;Engineering, Manufacturing	Computer Science;Engineering	0	5	0	5	6	Missing Fields	Missing Fields	Lu, Zl (Corresponding Author), Southeast Univ, Sch Mech Engn, Nanjing 211189, Jiangsu Prov, Peoples R China.			Wos:000275947300012	Missing Fields	products' stylistic features can be divided into explicit and implicit cues according to the theory of knowledge's division. based on the theoretic frame and knowledge system of industrial design, patterns of design dna is defined as explicit cues, implicit cues and mappings between them. the conceptual model of inheritance and variation is proposed and concept of inheritance power is defined. th…	Lu, Zl	Lu, Zl;Theoretical Research On Design Dna Based On Stylistic Feature In Industrial Design	109
2010	0	A Strategy For Customer-Oriented Human-Centric Product Conceptualization	Concept Generation;Concept Selection;Human-Centric;Customer-Oriented;General Sorting;Repertory Grids;Restricted Coulomb Energy Neural Network	Missing Fields	New World Situation: New Directions In Concurrent Engineering	Chang, Wc;Yan, W;Chen, Ch	Nanyang Technol Univ;Ming Chi Univ Technol;Shanghai Maritime Univ	Taiwan;Peoples R China;Singapore	Chang, Wunching;Yan, Wei;Chen, Chun-Hsien	Engineering, Industrial;Engineering, Manufacturing	Engineering	0	1	0	1	12	Missing Fields	Missing Fields	Chang, Wc (Corresponding Author), Ming Chi Univ Technol, Dept Mech Engn, 84 Gungjuan Rd, Taipei 24301, Taiwan.			Wos:000395362700016	10.1007/978-0-85729-024-3_16	a functional-commercial analysis strategy (fcas) is proposed to facilitate customer-oriented and human-centric product concept generation and selection. first, general sorting is utilized to elicit the initial product platform, which is then used to generate initial design options of a specific product. after that, designers contribute importance ratings on the functional-commercial criteria with…	Chang, Wc	Chang, Wc;A Strategy For Customer-Oriented Human-Centric Product Conceptualization	210
2010	0	Computer-Aided Form Generation For Product Design	Computer-Aided Design;Form Generation;Fuzzy Set Theory;Genetic Algorithms	Genetic Algorithm;Image Evaluation;Neural-Network	Manufacturing Science And Engineering, Pts 1-5	Tsai, Hc;Chen, Tl;Tsai, Hj;Hung, Fk	Natl Kaohsiung First Univ Sci & Technol;Natl Taipei Univ Technol;Wufeng Inst Technol	Taiwan	Tsai, Hung-Cheng;Chen, Tien-Li;Tsai, Hung-Jung;Hung, Fei-Kung	Materials Science, Multidisciplinary;Materials Science, Coatings & Films;Materials Science, Composites	Materials Science	0	6	0	6	14	Missing Fields	National Science Council Of Taiwan [Nsc98-2221-E-327-019-My2]	Tsai, Hc (Corresponding Author), Natl Kaohsiung First Univ Sci & Technol, Grad Inst Ind Design, Kaohsiung 811, Taiwan.			Wos:000279864702038	10.4028/Www.Scientific.Net/Amr.97-101.3785	the product form design activities involve a high degree of uncertainty and complexity and are therefore not easily formulated, coded and regularized. consequently, very few of the computer-aided design approaches presented in the literature can support the conceptual form design tasks typically performed at the preliminary stages of a product's development cycle. to enable designers to perform t…	Tsai, Hc	Tsai, Hc;Computer-Aided Form Generation For Product Design	419
2010	196	Computer-Generated Residential Building Layouts	Procedural Modeling;Architectural Modeling;Computer-Aided Architectural Design;Spatial Allocation;Data-Driven 3D Modeling	Missing Fields	Acm Transactions On Graphics	Merrell, P;Schkufza, E;Koltun, V	Stanford Univ	Usa	Merrell, Paul;Schkufza, Eric;Koltun, Vladlen	Computer Science, Software Engineering	Computer Science	4	62	217	62	47	DEC	Nsf [Ses-0835601, Ccf-0641402]	Merrell, P (Corresponding Author), Stanford Univ, Stanford, Ca 94305 Usa.			Wos:000284943000045	10.1145/1866158.1866203	we present a method for automated generation of building layouts for computer graphics applications. our approach is motivated by the layout design process developed in architecture. given a set of high-level requirements, an architectural program is synthesized using a bayesian network trained on real-world data. the architectural program is realized in a set of floor plans, obtained through sto…	Merrell, P	Merrell, P;Computer-Generated Residential Building Layouts	405
2010	108	Data-Driven Image Color Theme Enhancement	Color Theme;Color Optimization;Histograms;Soft Segmentation;Texture Classes	Preference;Appearance;Emotions	Acm Transactions On Graphics	Wang, By;Yu, Yz;Wong, Tt;Chen, C;Xu, Yq	Zhejiang Univ;Chinese Univ Hong Kong;Univ Illinois	Usa;Peoples R China	Wang, Baoyuan;Yu, Yizhou;Wong, Tien-Tsin;Chen, Chun;Xu, Ying-Qing	Computer Science, Software Engineering	Computer Science	0	17	116	17	26	DEC	National Science Foundation [Iis 09-14631];National Natural Science Foundation Of China [60728204/F020404];Hong Kong Research Grants Council [Cuhk417107]	Wang, By (Corresponding Author), Zhejiang Univ, Hangzhou, Zhejiang, Peoples R China.			Wos:000284943000010	10.1145/1866158.1866172	it is often important for designers and photographers to convey or enhance desired color themes in their work. a color theme is typically defined as a template of colors and an associated verbal description. this paper presents a data-driven method for enhancing a desired color theme in an image. we formulate our goal as a unified optimization that simultaneously considers a desired color theme, …	Wang, By	Wang, By;Data-Driven Image Color Theme Enhancement	387
2010	38	Designing Inclusive Ict Products For Older Users: Taking Into Account The Technology Generation Effect	Information And Communication Technology Products;Technology Generation;Generation Effects;Interface Style	Missing Fields	Journal Of Engineering Design	Lim, Csc	Glasgow Sch Art	Scotland	Lim, Christopher Sze Chong	Engineering, Multidisciplinary	Engineering	1	32	47	32	30	Missing Fields	Missing Fields	Lim, Csc (Corresponding Author), Glasgow Sch Art, Sch Design, 167 Renfrew St, Glasgow G20 9Es, Lanark, Scotland.			Wos:000277576100006	10.1080/09544820903317001	technological products such as mobile phones have the potential to increase the quality of life among older people through enhancing communication networks and recreation. however, surveys have shown that older populations are slower to adopt new technological products compared with younger populations. due to technological advances, the way we interact with information and communication technolo…	Lim, Csc	Lim, Csc;Designing Inclusive Ict Products For Older Users: Taking Into Account The Technology Generation Effect	163
2010	0	Developing Customer Preferences For Concept Generation By Using Engineering Ontologies	Missing Fields	Information-Retrieval;Design;Shape;Methodology;Model	Proceedings Of The Asme International Design Engineering Technical Conferences And Computers And Information In Engineering Conference, Detc 2010, Vol 3, A And B	Cao, Dx;Ramani, K;Li, Zj;Raskin, V;Liu, Y;Li, Zw	Hebei Univ Technol	Peoples R China	Cao, Dongxing;Ramani, Karthik;Li, Zhanjun;Raskin, Victor;Liu, Ying;Li, Zhanwei	Computer Science, Interdisciplinary Applications;Engineering, Multidisciplinary	Computer Science;Engineering	0	1	0	1	0	Missing Fields	Missing Fields	Cao, Dx (Corresponding Author), Hebei Univ Technol, Mech Design & Applicat Lab, Dept Mech Engn, Tianjin 300130, Peoples R China.			Wos:000320569900048	Missing Fields	as customer preference is viewed as a reflection of desires for product features and even future product opportunities, it is crucial for the generation of design concepts. in this paper, a six-stage methodology is described for developing customer preference by using engineering ontology. the methodology mainly focuses upon understanding the product domain knowledge and preference concepts. a mo…	Cao, Dx	Cao, Dx;Developing Customer Preferences For Concept Generation By Using Engineering Ontologies	433
2010	0	Guiding Concept Generation Based On Ontology For Customer Preference Modeling	Ontology;Concepts;Customer Preference;Semantic Expression;Information Extraction	Retrieval;Shape	Tools And Methods Of Competitive Engineering, Vols 1-2	Cao, Dx;Ramani, K;Li, Zj	Eaglepicher Med Power;Purdue Univ;Hebei Univ Technol	Usa;Peoples R China	Cao, Dongxing;Ramani, Karthik;Li, Zhanjun	Engineering, Industrial	Engineering	0	0	0	0	38	Missing Fields	Product Lifecycle Management (Plm) Center At Purdue University;Center For Advanced Manufacturing (Cam)	Cao, Dx (Corresponding Author), Hebei Univ Technol, Sch Mech Engn, Tianjin, Peoples R China.			Wos:000393727100091	Missing Fields	customers often show different preferences relative to the same products, such as function, shape, color, costs, etc. they will surely affect product market activities further. in this paper, a model of preference elicitation from customers is proposed to reduce the gap between the systematic representation of preferences and customers' actual preferences. firstly, the attribute of customer prefe…	Cao, Dx	Cao, Dx;Guiding Concept Generation Based On Ontology For Customer Preference Modeling	428
2010	3	Research On Product Image Form Optimization Design	Industrial Design;Product Image Form Design;Neural Network;Genetic Algorithm	Neural-Network	Iccsit 2010 - 3Rd Ieee International Conference On Computer Science And Information Technology, Vol 2	Li, Yf;Zhu, Lp	Xuzhou Normal Univ	Peoples R China	Li, Yongfeng;Zhu, Liping	Computer Science, Information Systems;Computer Science, Theory & Methods;Engineering, Electrical & Electronic	Computer Science;Engineering	0	4	3	4	11	Missing Fields	Xuzhou Normal University, P.R.C. [09Xla15]	Li, Yf (Corresponding Author), Xuzhou Normal Univ, Coll Mech & Elect Engn, Xuzhou, Peoples R China.			Wos:000393184100037	Missing Fields	in order to design the products that meet consumer emotional demands, this paper proposes a systematic method which combines neural network with genetic algorithm. firstly, a back propagation neural network is applied to map the relationships between product design elements and customer kansei image evaluation. secondly, generic algorithm is employed to search for the optimal product form which s…	Li, Yf	Li, Yf;Research On Product Image Form Optimization Design	85
2010	0	System For 3D Form Generation And Impression Analysis Based On Emotional Words: "Kansei Words"	Missing Fields	Missing Fields	Proceedings Of The Asme International Design Engineering Technical Conferences And Computers And Information In Engineering Conference, Detc 2010, Vol 3, A And B	Aoyama, H;Miyauchi, S	Keio Univ	Japan	Aoyama, Hideki;Miyauchi, Shigeto	Computer Science, Interdisciplinary Applications;Engineering, Multidisciplinary	Computer Science;Engineering	0	1	0	1	5	Missing Fields	Missing Fields	Aoyama, H (Corresponding Author), Keio Univ, Lab Digital Designing & Digital Mfg, Dept Syst Design Engn, Yokohama, Kanagawa 2238522, Japan.			Wos:000320569900060	Missing Fields	appearance design is becoming an increasingly important factor for determining product value as well as product functions as customer preference continues to diversify, leading to growing demands for sophisticated designs. current cad systems are not effective for design because they lack functions to express the designer's sensitivity (kansei). in the first step of appearance design, the designe…	Aoyama, H	Aoyama, H;System For 3D Form Generation And Impression Analysis Based On Emotional Words: "Kansei Words"	438
2010	0	The Study Of Mechanical Product Concept Design Method Based On Reverse Engineering	Concept Design;Reverse Engineering;Decomposition And Reconstruction;The Functional Pattern	Missing Fields	Manufacturing Science And Engineering, Pts 1-5	Li, Pg;Feng, Xy;Shen, Xx;Zhang, Cl	Shandong Univ	Peoples R China	Li, Peigang;Feng, Xianying;Shen, Xiaoxia;Zhang, Chengliang	Materials Science, Multidisciplinary;Materials Science, Coatings & Films;Materials Science, Composites	Materials Science	0	5	0	5	8	Missing Fields	Missing Fields	Li, Pg (Corresponding Author), Shandong Univ, Sch Mech Engn, Jinan 250061, Peoples R China.			Wos:000279864702025	10.4028/Www.Scientific.Net/Amr.97-101.3731	the mechanical product concept design method based on reverse engineering (re) is a new approach in the concept design domain. the functional pattern is thought as an effective carrier and medium of mapping function to structure, which provides an efficient path for expressing the intrinsic evolution rule of the complex mechanical qualitative structure. and it is used as the information organizat…	Li, Pg	Li, Pg;The Study Of Mechanical Product Concept Design Method Based On Reverse Engineering	128
2011	4	A Methodology For Creating Shape Rules During Product Design	Geometry;Product Design;Product Development;Shapes (Structures)	Grammar;Language;Transformations;Generation;Houses	Journal Of Mechanical Design	Oster, A;Mccormack, J	Univ Idaho	Usa	Oster, Adam;Mccormack, Jay	Engineering, Mechanical	Engineering	2	18	6	18	38	JUN	Missing Fields	Oster, A (Corresponding Author), Univ Idaho, Moscow, Id 83844 Usa.			Wos:000291991800009	10.1115/1.4004195	shape grammars provide the means to represent the physical embodiment of a class of products in a set of generative rules. once developed, the shape grammar can be used to generate new forms through automated synthesis or interaction by one or more designers. creating the shape rules has been most often performed after the design process by examining existing designs. furthermore, the approach to…	Oster, A	Oster, A;A Methodology For Creating Shape Rules During Product Design	410
2011	11	A Novel Design Of Data-Driven Architecture For Remote Monitoring And Remote Control Of Sensors Over A Wireless Sensor Network And The Internet	Wireless Sensor Network;Svg;Ajax;Http;Web-Based System	Missing Fields	Journal Of Internet Technology	Chang, Yj;Huang, Wt	Minghsin Univ Sci & Technol;Cent Taiwan Univ Sci & Technol	Taiwan	Chang, Yuan-Jen;Huang, Wen-Tzeng	Computer Science, Information Systems;Telecommunications	Computer Science;Telecommunications	0	2	11	2	20	JAN	Missing Fields	Chang, Yj (Corresponding Author), Cent Taiwan Univ Sci & Technol, Dept Management Informat Syst, Taichung, Taiwan.			Wos:000287064400014	Missing Fields	this study revealed a novel design with an asynchronous concept to provide remote monitoring and remote control functionalities for sensors in wireless sensor network (wsn) via the internet. the architecture includes two independent parts: data communication between the user interface (ui) and the database, and data communication between the sensor network and the database. asynchronous interoper…	Chang, Yj	Chang, Yj;A Novel Design Of Data-Driven Architecture For Remote Monitoring And Remote Control Of Sensors Over A Wireless Sensor Network And The Internet	403
2011	1	Feature Based Similarity Measures Of 3D Models	3D Model;Similarity Measures;Shape Feature;Design Reuse	Missing Fields	Advanced Materials And Information Technology Processing, Pts 1-3	Yang, Zx;Xiao, Df	Univ Macau	Peoples R China	Yang, Zhixin;Xiao, Difu	Education, Scientific Disciplines;Materials Science, Multidisciplinary	Education & Educational Research;Materials Science	0	1	1	1	11	Missing Fields	Missing Fields	Yang, Zx (Corresponding Author), Univ Macau, Fac Sci & Technol, Dept Electromech Engn, Taipa, Macau, Peoples R China.			Wos:000303363500118	10.4028/Www.Scientific.Net/Amr.271-273.639	the industries are facing with the pressure to design products that could meet various customers requirements in short term. at the main time, there are a lot of existing 3d models are available from accumulation of years of design practice. it is therefore critical to extract similar models from existing ones for reuse. this paper proposes a feature based similarity access tools which describe t…	Yang, Zx	Yang, Zx;Feature Based Similarity Measures Of 3D Models	441
2011	1	Form Generation Model Of Two Thinking Paths	Shape Generation;Vertical Thinking;Horizontal Thinking	Missing Fields	Advanced Manufacturing Systems, Pts 1-3	Tseng, Sww;Chang, Tw;Lin, Jh	Natl Yunlin Univ Sci & Technol	Taiwan	Tseng, Sei-Wo Winger;Chang, Teng-Wen;Lin, Ji-Hong	Engineering, Manufacturing;Engineering, Mechanical;Operations Research & Management Science;Materials Science, Multidisciplinary	Engineering;Operations Research & Management Science;Materials Science	0	3	1	3	4	Missing Fields	National Science Council Of The Republic Of China [Nsc98-2410-H224-021]	Tseng, Sww (Corresponding Author), Natl Yunlin Univ Sci & Technol, Dept Ind Design, Touliu 640, Yunlin, Taiwan.			Wos:000292116000224	10.4028/Www.Scientific.Net/Amr.201-203.1177	a model of two thinking paths is developed in this article. early researchers of computer aided for product design focused their attention on sensation of consumers on product appearance to meet the consumer need. however, these generative rules of digital form did not consider the thinking process during design concept development. the experiment was designed to explore the concept transformatio…	Tseng, Sww	Tseng, Sww;Form Generation Model Of Two Thinking Paths	199
2011	0	Modelling And Optimization Of Data-Driven Scene Graphs	Modelling;Optimization;Scene Graph;Vector Graphics;User Interfaces;Safety Critical Systems;Embedded Systems;Mobile Systems;Real-Time Systems	Vector-Graphics;Devices	Grapp 2011: Proceedings Of The International Conference On Computer Graphics Theory And Applications	Boisgérault, S;Vecchié, E	Mines Paristech	France	Boisgerault, Sebastien;Vecchie, Eric	Computer Science, Software Engineering	Computer Science	0	0	0	0	7	Missing Fields	Missing Fields	Boisgérault, S (Corresponding Author), Mines Paristech, 60 Bd St Michel, Paris, France.			Wos:000392902600040	Missing Fields	this article presents data-driven scene graphs, a set of models that address the needs of safety-critical user interfaces design. data-driven scene graphs merge a description of the user interface behavior as a data-flow program with a description of its graphics content as a hierarchical structure of vector and raster elements. we present a formal description of these models, discuss their seman…	Boisgérault, S	Boisgérault, S;Modelling And Optimization Of Data-Driven Scene Graphs	382
2011	42	Trend Mining For Predictive Product Design	Trend Mining;Predictive Product Design;Knowledge Discovery;Data Mining	Discrete-Choice Analysis;Models;Promotion;Tests	Journal Of Mechanical Design	Tucker, Cs;Kim, Hm	Penn State Univ;Univ Illinois	Usa	Tucker, Conrad S;Kim, Harrison M	Engineering, Mechanical	Engineering	3	40	53	40	37	NOV	National Science Foundation [0726934, Cmmi-0726934];Sandia National Labs;Surge;Directorate For Engineering;Div Of Civil, Mechanical, & Manufact Inn [0953021, 0726934] Funding Source: National Science Foundation	Kim, Hm (Corresponding Author), Univ Illinois, 104 S Mathews Ave, Urbana, Il 61801 Usa.			Wos:000298009000009	10.1115/1.4004987	the preference trend mining (ptm) algorithm that is proposed in this work aims to address some fundamental challenges of current demand modeling techniques being employed in the product design community. the first contribution is a multistage predictive modeling approach that captures changes in consumer preferences (as they relate to product design) over time, hereby enabling design engineers to…	Tucker, Cs	Tucker, Cs;Trend Mining For Predictive Product Design	208
2012	6	A Quality-Time-Cost-Oriented Strategy For Product Conceptualization	Product Conceptualization;Product Platform;Product Family;Quality Time Cost;Design Space Framework;Product Development	Concurrent Design;Knowledge;System;Hierarchy;Network;Requirements;Selection	Advanced Engineering Informatics	Chen, Ch;Chong, Yt;Chang, Wc;Yan, W	Nanyang Technol Univ;Ming Chi Univ Technol;Shanghai Maritime Univ	Singapore;Taiwan;Peoples R China	Chen, Chun-Hsien;Chong, Yih Tng;Chang, Wunching;Yan, Wei	Computer Science, Artificial Intelligence;Engineering, Multidisciplinary	Computer Science;Engineering	2	19	7	19	56	JAN	The Program For Professor Of Special Appointment (Eastern Scholar) At Shanghai Institutions Of Higher Learning	Chang, Wc (Corresponding Author), Ming Chi Univ Technol, Dept Mech Engn, 84 Gungjuan Rd, New Taipei City 24301, Taiwan.			Wos:000300071300004	10.1016/J.Aei.2011.08.004	in general, product development companies aim to deliver products of optimal quality while incurring minimal cost in the shortest time possible. in this work, a quality-time-cost-oriented strategy (qtcos) is proposed to facilitate product concept generation and selection. firstly, general sorting is employed to elicit an initial product platform. the platform, constructed with a design space fram…	Chen, Ch	Chen, Ch;A Quality-Time-Cost-Oriented Strategy For Product Conceptualization	211
2012	0	A Review Of Metaheuristic-Based Product Concept Generation Systems	Metaheuristic;Generative Systems;Product Design	Genetic Algorithm;Hybrid Approach;Design;Optimization;Form	Manufacturing Science And Technology, Pts 1-8	Ang, Mc;Mckay, A;Ng, Kw	Univ Leeds;Univ Kebangsaan Malaysia	England;Malaysia	Ang, M C;Mckay, A;Ng, K W	Computer Science, Interdisciplinary Applications;Engineering, Manufacturing;Engineering, Mechanical;Materials Science, Multidisciplinary	Computer Science;Engineering;Materials Science	1	6	0	6	41	Missing Fields	Universiti Kebangsaan Malaysia [Ukm-Ggpm-Ict-102-2010]	Ang, Mc (Corresponding Author), Univ Kebangsaan Malaysia, Ftsm, Sch Informat Technol, Bandar Baru Bangi 43600, Selangor, Malaysia.			Wos:000309016402120	10.4028/Www.Scientific.Net/Amr.383-390.4594	the task of designing product forms is becoming increasingly challenging as consumers demand visually pleasing products that meet functional requirements. researchers have been working on product concept generation systems that support designers in exploring design spaces to produce large numbers of product concepts from which possible solutions can be selected and developed. such systems typical…	Ang, Mc	Ang, Mc;A Review Of Metaheuristic-Based Product Concept Generation Systems	418
2012	9	Emotional Cellular-Based Multi- Class Fuzzy Support Vector Machines On Product'S Kansei Extraction	Emotional Cellular;Gaussian Density Function;Multi-Class Fuzzy Support Vector Machines;Kansei Image	Cancer Classification;Gene Selection;Svm-Rfe	Applied Mathematics & Information Sciences	Shi, Fq;Xu, J	Wenzhou Med Coll;Southeast Univ	Peoples R China	Shi, Fuqian;Xu, Jiang	Mathematics, Applied;Physics, Mathematical	Mathematics;Physics	1	13	13	13	29	JAN	Natural Science Foundation Of Zhejiang Province [Y1110322]	Shi, Fq (Corresponding Author), Wenzhou Med Coll, Dept Informat & Engn, Wenzhou 325035, Peoples R China.			Wos:000298338300006	Missing Fields	it is an important methodology to extract product's overall kansei images by evaluating critical form features (cff). in this paper, multi-class fuzzy support vector machines (mf-svm) employing emotional cellular (ec) model was presented to extract kansei images of product's cff. ec is a very special kind of semantics cell, which is defined on two-dimensional (valence-arousal) emotional space. th…	Shi, Fq	Shi, Fq;Emotional Cellular-Based Multi- Class Fuzzy Support Vector Machines On Product'S Kansei Extraction	139
2012	22	Parametric Feature Constraint Modeling And Mapping In Product Development	Feature-Based Design (Fbd);Concurrent Engineering (Ce);Assembly Feature (Af);Product Lifecycle Management (Plm);Engineering Informatics	Cad-System;Design;Extraction;Framework;Support	Advanced Engineering Informatics	Yin, Cg;Ma, Ys	China Agr Univ;Univ Alberta	Canada;Peoples R China	Yin, C -G;Ma, Y -S	Computer Science, Artificial Intelligence;Engineering, Multidisciplinary	Computer Science;Engineering	1	40	25	40	43	AUG	China Scholarship Council (Csc) [2008635512];Canada Nserc Discovery Grant [355454-09]	Ma, Ys (Corresponding Author), Univ Alberta, Dept Mech Engn, Edmonton, Ab T6G 2G8, Canada.			Wos:000307140300007	10.1016/J.Aei.2012.02.010	this paper presents the exploration and application of a feature-based design methodology within mechanical product development cycles. based on a review of the feature technology and previous research work, this paper focuses on the modeling of intricate relations among features of different design aspects. a concept of feature parameter map that leads to a constraint mapping method is proposed.…	Yin, Cg	Yin, Cg;Parametric Feature Constraint Modeling And Mapping In Product Development	81
2012	2	Product Environment Requirements Mapping And Processing Based On Qfde And Triz	Customer Requirements;Green Design;Product Environment Requirements;Contradiction Matrix	Missing Fields	Advanced Mechanical Design, Pts 1-3	Bao, H;Liu, Gf;Bian, By	Hefei Univ Technol	Peoples R China	Bao Hong;Liu Guangfu;Bian Benyang	Engineering, Manufacturing;Engineering, Mechanical;Materials Science, Multidisciplinary	Engineering;Materials Science	1	11	2	11	6	Missing Fields	National Science Foundation [51135004, 5S1105127]	Bao, H (Corresponding Author), Hefei Univ Technol, Sch Mech & Automobile Engn, Hefei 230009, Peoples R China.			Wos:000311979400435	10.4028/Www.Scientific.Net/Amr.479-481.2171	mapping and processing customer requirements is one of key procedures in green design. the basic theory and methods of product environment requirements mapping and processing are researched, the implementation process of product environment requirements mapping and processing is identified, product environment requirements are mapped based on environmental house of quality (hoq). design requireme…	Bao, H	Bao, H;Product Environment Requirements Mapping And Processing Based On Qfde And Triz	78
2012	0	Representation Of Type In Grammatical Design	Type;Design Grammars;Generative Design;Description Scheme;Product Design	Missing Fields	Proceedings Of The 17Th International Conference On Computer-Aided Architectural Design Research In Asia (Caadria 2012): Beyond Codes And Pixels	Ahmad, S	Aka Res & Design	India	Ahmad, Sumbul	Architecture;Computer Science, Interdisciplinary Applications	Architecture;Computer Science	0	3	0	3	11	Missing Fields	Missing Fields	Ahmad, S (Corresponding Author), Aka Res & Design, New Delhi, India.			Wos:000351498300043	Missing Fields	grammatical design is useful for the generation of a set of related designs. the concept of type aids designers in generating designs with a specified structure. however, existing studies in grammar are ambiguous in their definition of type in the language of designs generated by a grammar. extending our previous study of defining style in grammar, this paper provides a formal definition of the c…	Ahmad, S	Ahmad, S;Representation Of Type In Grammatical Design	184
2012	4	Scrum Conceptualization Using K-Crio Ontology	Missing Fields	Organizations;Semantics;Design;Model	Data-Driven Process Discovery And Analysis, Simpda 2011	Lin, Ys;Hilaire, V;Gaud, N;Koukam, A	Utbm	France	Lin, Yishuai;Hilaire, Vincent;Gaud, Nicolas;Koukam, Abderrafiaa	Computer Science, Information Systems	Computer Science	0	1	5	1	14	Missing Fields	Missing Fields	Lin, Ys (Corresponding Author), Utbm, Lab Syst & Transports Set, F-90010 Belfort, France.			Wos:000345330100011	Missing Fields	many enterprises are on the path towards the automation of their business processes. to be fully efficient this kind of automation needs to rely on rich models of business processes. this paper presents an ontology, named k-crio, that allows the description of a specific kind of business processes: those that are dedicated to the design of a product. this ontology draws from organizational theori…	Lin, Ys	Lin, Ys;Scrum Conceptualization Using K-Crio Ontology	377
2012	0	The Robustness Analysis Of Mapping Process From Functional Domain To Physical Domain In Axiomatic Design For Product Design	Robust Design;Robustness Analysis;Axiomatic Design;Mapping;Product Design	Missing Fields	Frontiers Of Advanced Materials And Engineering Technology, Pts 1-3	Cheng, Xf	E China Jiaotong Univ	Peoples R China	Cheng, Xianfu	Materials Science, Multidisciplinary	Materials Science	2	14	0	14	9	Missing Fields	Missing Fields	Cheng, Xf (Corresponding Author), E China Jiaotong Univ, Sch Mech & Elect Engn, Nanchang 330013, Peoples R China.			Wos:000310495401032	10.4028/Www.Scientific.Net/Amr.430-432.1554	the robust design in early design phases has crucial effect on the quality of product. it aims to design a product that satisfies customer needs while ensuring minimal effects of environmental variations. so, it is very necessary to research on the system robustness. axiomatic design generally leads to design robustness, which can easily represent system structure, capture design requirements, an…	Cheng, Xf	Cheng, Xf;The Robustness Analysis Of Mapping Process From Functional Domain To Physical Domain In Axiomatic Design For Product Design	72
2013	3	A New Integration Mechanism For Knowledge Map Of Complex Product Development	Complex Product Development;Knowledge Integration Map;The Local Detailed Map;The Whole Framework Map;Integration Method	Missing Fields	2013 10Th International Conference On Fuzzy Systems And Knowledge Discovery (Fskd)	Liu, Jh;Ge, L	Beihang Univ	Peoples R China	Liu, Jihong;Ge, Ling	Computer Science, Artificial Intelligence;Computer Science, Information Systems	Computer Science	1	15	3	15	9	Missing Fields	Missing Fields	Liu, Jh (Corresponding Author), Beihang Univ, Sch Mech Engn & Automat, Beijing 100191, Peoples R China.			Wos:000341633700087	Missing Fields	currently complex product development involves effective communication and knowledge sharing across multidisciplinary teams and departments, whose processes and product structures are complicated. this paper presents a generalized framework to integrate knowledge maps to reuse development knowledge adequately. firstly, the knowledge map of complex product development is classified as the concept …	Liu, Jh	Liu, Jh;A New Integration Mechanism For Knowledge Map Of Complex Product Development	71
2013	0	Extraction Of Design Factors Of Product Family Based On Customer Needs	Product Family;Design Factors;Mapping;Qfd;Hoq	Missing Fields	Advanced Designs And Researches For Manufacturing, Pts 1-3	Ni, Mn;Lv, Qz;Jin, P	Donghua Univ;Yiwu Ind & Commercial Vocat & Tech Coll	Peoples R China	Ni, Minna;Lv, Qingzhang;Jin, Ping	Engineering, Manufacturing	Engineering	0	4	0	4	4	Missing Fields	Missing Fields	Ni, Mn (Corresponding Author), Donghua Univ, Mech Coll, People North Rd 2999, Shanghai, Peoples R China.			Wos:000318958000049	10.4028/Www.Scientific.Net/Amr.605-607.250	design factors of product-family is one of the important elements to maintain and to improve customers' loyalty to a band. extraction of design factors of product family based on customer needs promotes relations between brands and customers while improves satisfaction to products of the consumers. in existing studies, methods of getting customer needs have always attracted close attention. but t…	Ni, Mn	Ni, Mn;Extraction Of Design Factors Of Product Family Based On Customer Needs	94
2013	0	Manufacturability Analysis Of Integrated Product Based On Feature Mapping	Feature Mapping;Manufacturing Feature;Manufacturability Analysis;Integrated Product	Missing Fields	Applied Materials And Technologies For Modern Manufacturing, Pts 1-4	Tian, Jp;Huang, Dp;Zhang, Ld;Yang, Hl;Huang, Yc	Sichuan Univ Sci & Engn	Peoples R China	Tian, Jianping;Huang, Danping;Zhang, Liangdong;Yang, Haili;Huang, Yuchun	Engineering, Manufacturing;Engineering, Mechanical;Materials Science, Multidisciplinary;Mechanics	Engineering;Materials Science;Mechanics	0	2	0	2	5	Missing Fields	Missing Fields	Tian, Jp (Corresponding Author), Sichuan Univ Sci & Engn, Sch Mech Engn, Zigong 643000, Peoples R China.			Wos:000339363800360	10.4028/Www.Scientific.Net/Amm.423-426.1837	for the lack of effective product representation method, traditional cad system cannot support integration of product design and manufacture effectively. this integration is the key to achieving three-dimensional process design. using the model definition of manufacturing feature, the part information of processing & manufacturing could be expressed completely. this representation method was put …	Tian, Jp	Tian, Jp;Manufacturability Analysis Of Integrated Product Based On Feature Mapping	76
2013	2	Multi-Instance Object Segmentation With Exemplars	Missing Fields	Missing Fields	2013 Ieee International Conference On Computer Vision Workshops (Iccvw)	He, Xm;Gould, S	Nicta;Australian Natl Univ	Australia	He, Xuming;Gould, Stephen	Computer Science, Artificial Intelligence;Engineering, Electrical & Electronic	Computer Science;Engineering	1	3	2	3	13	Missing Fields	Missing Fields	He, Xm (Corresponding Author), Nicta, Comp Vis Grp, Sydney, Nsw, Australia.			Wos:000349847200001	10.1109/Iccvw.2013.9	we address the problem of joint detection and segmentation of multiple object instances in an image, a key step towards scene understanding. inspired by data-driven methods, we propose an exemplar-based approach to the task of multi-instance segmentation using a small set of annotated reference images. we design a novel crf model that jointly models object appearance, shape deformation, and objec…	He, Xm	He, Xm;Multi-Instance Object Segmentation With Exemplars	41
2013	41	Probabilistic Color-By-Numbers: Suggesting Pattern Colorizations Using Factor Graphs	Probabilistic Modeling;Factor Graphs;Colorization;Graphic Design;Data-Driven Methods;Markov Chain Monte Carlo	Missing Fields	Acm Transactions On Graphics	Lin, S;Ritchie, D;Fisher, M;Hanrahan, P	Stanford Univ	Usa	Lin, Sharon;Ritchie, Daniel;Fisher, Matthew;Hanrahan, Pat	Computer Science, Software Engineering	Computer Science	0	8	44	8	34	JUL	Intel (Istc-Vc);Sap Stanford Graduate Fellowship	Lin, S (Corresponding Author), Stanford Univ, Stanford, Ca 94305 Usa.			Wos:000321840100006	10.1145/2461912.2461988	we present a probabilistic factor graph model for automatically coloring 2d patterns. the model is trained on example patterns to statistically capture their stylistic properties. it incorporates terms for enforcing both color compatibility and spatial arrangements of colors that are consistent with the training examples. using markov chain monte carlo, the model can be sampled to generate a dive…	Lin, S	Lin, S;Probabilistic Color-By-Numbers: Suggesting Pattern Colorizations Using Factor Graphs	141
2013	0	Reference Model Selection For A Model-Matching Data-Driven Control Design	Data-Driven Control Design;Model Matching;Reference Model;Loop Shaping Control Design	Missing Fields	2013 Proceedings Of Sice Annual Conference (Sice)	Saeki, M;Yamanari, N;Wada, N;Satoh, S	Hiroshima Univ	Japan	Saeki, Masami;Yamanari, Naoki;Wada, Nobutaka;Satoh, Satoshi	Automation & Control Systems;Instruments & Instrumentation	Automation & Control Systems;Instruments & Instrumentation	0	1	0	1	9	Missing Fields	Missing Fields	Saeki, M (Corresponding Author), Hiroshima Univ, Grad Sch Engn, Higashihiroshima 7398527, Japan.			Wos:000350982400085	Missing Fields	model matching is a useful method for control design. this method has been also studied in the data-driven control design that gives a controller directly from plant response data. main difficulty of this method lies in the selection of an appropriate reference model. in this paper, we propose a method of making an appropriate reference model based on the design result of our data-driven loop sha…	Saeki, M	Saeki, M;Reference Model Selection For A Model-Matching Data-Driven Control Design	5
2013	0	Rendering Of Unfalsified Pid Gain Sets For Parameter Space Control Design	Missing Fields	Model	2013 9Th Asian Control Conference (Ascc)	Saeki, M	Hiroshima Univ	Japan	Saeki, Masami	Automation & Control Systems;Engineering, Electrical & Electronic	Automation & Control Systems;Engineering	0	3	0	3	17	Missing Fields	Missing Fields	Saeki, M (Corresponding Author), Hiroshima Univ, Dept Mech Syst Engn, Kagamiyama 1-4-1, Higashihiroshima 7398527, Japan.			Wos:000333734900138	Missing Fields	in this paper, a new approach to the data-driven pid control design in parameter space is proposed. namely, first, volume data of the pid gains that are falsified by a necessary condition for the maximum sensitivity constraint is calculated, and next it is visualized by volume rendering. because of the recent development of parallel computation and gpu(graphics processing unit), rendering can be …	Saeki, M	Saeki, M;Rendering Of Unfalsified Pid Gain Sets For Parameter Space Control Design	146
2014	0	A Candidate Solutions Generator Based On Mixed Strategy For Non-Rigid Object Extraction	Hypothesis Generation;Mixed Strategy;Non-Rigid Object Extraction	Missing Fields	2014 International Conference On Security, Pattern Analysis, And Cybernetics (Spac)	Jiang, M;Zhou, Xz;Yao, Sj;Gan, Zh	Wuhan Univ Sci & Technol	Peoples R China	Jiang, Min;Zhou, Xiaozhou;Yao, Shijie;Gan, Zhaohui	Computer Science, Artificial Intelligence;Computer Science, Cybernetics;Computer Science, Theory & Methods;Engineering, Electrical & Electronic	Computer Science;Engineering	0	0	0	0	12	Missing Fields	Missing Fields	Jiang, M (Corresponding Author), Wuhan Univ Sci & Technol, Coll Comp Sci & Technol, Wuhan 430081, Peoples R China.			Wos:000363988900066	Missing Fields	extracting non-rigid object from images can be used in object recognition, medical image analysis, video monitoring, etc. in order to improve the efficiency and accuracy of visual object extraction, we design a candidate shape generator based on a mixture strategy, called mixture generator, it combines the image data driven method with model parameter driven method, and tends to generate valid sh…	Jiang, M	Jiang, M;A Candidate Solutions Generator Based On Mixed Strategy For Non-Rigid Object Extraction	45
2014	1	Data-Driven Method For High Level Rendering Pipeline Construction	Graphics Pipeline;Visualization;Visualization Algebra	Missing Fields	Neural Networks And Artificial Intelligence, Icnnai 2014	Krasnoproshin, V;Mazouka, D	Belarusian State Univ	Belarus	Krasnoproshin, Victor;Mazouka, Dzmitry	Computer Science, Artificial Intelligence;Computer Science, Theory & Methods	Computer Science	0	0	1	0	5	Missing Fields	Missing Fields	Krasnoproshin, V (Corresponding Author), Belarusian State Univ, Minsk 220050, Belarus.			Wos:000347515900018	Missing Fields	the paper describes a software methodology for the graphics pipeline extension. it is argued that common modern visualization techniques do not satisfy current visualization software development requirements adequately enough. the proposed approach is based on specialized formal language called visualization algebra. by invoking data-driven design principles inherited from the existing programmab…	Krasnoproshin, V	Krasnoproshin, V;Data-Driven Method For High Level Rendering Pipeline Construction	386
2014	22	Decobrush: Drawing Structured Decorative Patterns By Example	Stroke;Stylization;Data-Driven;Decorative Patterns	Missing Fields	Acm Transactions On Graphics	Lu, Jw;Barnes, C;Wan, C;Asente, P;Mech, R;Finkelstein, A	Univ Virginia;Princeton Univ;Adobe Res	Usa;India	Lu, Jingwan;Barnes, Connelly;Wan, Connie;Asente, Paul;Mech, Radomir;Finkelstein, Adam	Computer Science, Software Engineering	Computer Science	2	9	27	9	32	JUL	Missing Fields	Lu, Jw (Corresponding Author), Princeton Univ, Princeton, Nj 08544 Usa.			Wos:000340000100057	10.1145/2601097.2601190	structured decorative patterns are common ornamentations in a variety of media like books, web pages, greeting cards and interior design. creating such art from scratch using conventional software is time consuming for experts and daunting for novices. we introduce decobrush, a data-driven drawing system that generalizes the conventional digital "painting" concept beyond the scope of natural medi…	Lu, Jw	Lu, Jw;Decobrush: Drawing Structured Decorative Patterns By Example	395
2014	59	Design And Fabrication By Example	Fabrication;Data-Driven Methods;Design	Exploration;Model	Acm Transactions On Graphics	Schulz, A;Shamir, A;Levin, Diw;Sitthi-Amorn, P;Matusik, W	Interdisciplinary Ctr Herzliya;Mit	Usa;Israel	Schulz, Adriana;Shamir, Ariel;Levin, David I W;Sitthi-Amorn, Pitchaya;Matusik, Wojciech	Computer Science, Software Engineering	Computer Science	1	12	70	12	29	JUL	Nsf [1138967];Israel Science Foundation [324/11];Div Of Information & Intelligent Systems;Direct For Computer & Info Scie & Enginr [1116296] Funding Source: National Science Foundation	Schulz, A (Corresponding Author), Mit, Cambridge, Ma 02139 Usa.			Wos:000340000100029	10.1145/2601097.2601127	we propose a data-driven method for designing 3d models that can be fabricated. first, our approach converts a collection of expert-created designs to a dataset of parameterized design templates that includes all information necessary for fabrication. the templates are then used in an interactive design system to create new fabricable models in a design-by-example manner. a simple interface allow…	Schulz, A	Schulz, A;Design And Fabrication By Example	389
2014	12	Hgh Isoform Differential Immunoassays Applied To Blood Samples From Athletes: Decision Limits For Anti-Doping Testing	Quantile;Regression;Decision Limits;Isoforms;Human Growth Hormone;Doping	Growth-Hormone;Sports;Gh	Growth Hormone & Igf Research	Hanley, Ja;Saarela, O;Stephens, Da;Thalabard, Jc	Paris Descartes Univ;Hop Cochin;Mcgill Univ	Canada;France	Hanley, James A;Saarela, Olli;Stephens, David A;Thalabard, Jean-Christophe	Cell Biology;Endocrinology & Metabolism	Cell Biology;Endocrinology & Metabolism	0	18	12	18	12	OCT	Missing Fields	Hanley, Ja (Corresponding Author), Dept Epidemiol Biostat & Occupat Hlth, 1020 Pine Ave West, Montreal, Pq H3A 1A2, Canada.			Wos:000343629100009	10.1016/J.Ghir.2014.06.001	objective: to detect hgh doping in sport, the world anti-doping agency (wada)-accredited laboratories use the ratio of the concentrations of recombinant hgh ('rec') versus other 'natural' pituitary-derived isoforms of hgh ('pit'), measured with two different kits developed specifically to detect the administration of exogenous hgh. the current joint compliance decision limits (dls) for ratios der…	Hanley, Ja	Hanley, Ja;Hgh Isoform Differential Immunoassays Applied To Blood Samples From Athletes: Decision Limits For Anti-Doping Testing	63
2014	0	Predictive, Data-Driven Product Family Design	Predictive Design Analytics;Preference Trend Mining;Product Family Design	Platform Design;Methodology	Proceedings Of The Asme International Design Engineering Technical Conferences And Computers And Information In Engineering Conference, 2014, Vol 2A	Ma, J;Kim, Hm	Univ Illinois	Usa	Ma, Jungmok;Kim, Harrison M	Engineering, Electrical & Electronic;Engineering, Mechanical	Engineering	0	7	0	7	22	Missing Fields	Missing Fields	Kim, Hm (Corresponding Author), Univ Illinois, Dept Ind & Enterprise Syst Engn, Enterprise Syst Optimizat Lab, Urbana, Il 61801 Usa.			Wos:000379987200011	Missing Fields	predictive design analytics is a new paradigm to enable design engineers to extract knowledge from large-scale, multidimensional, unstructured, volatile data, and transform the knowledge and its trend into design decision making. predictive, data driven family design (pdfd) is proposed as one of the predictive design analytics methods to tackle some issues in family design. first, a number and sp…	Ma, J	Ma, J;Predictive, Data-Driven Product Family Design	288
2014	1	Research On The Key Technologies Of Ceramic Pattern Design System	Ceramic Pattern;Asp.Net;Genotyping Algorithm;Sketch;Cad	Missing Fields	2014 Fifth International Conference On Intelligent Systems Design And Engineering Applications (Isdea)	We, Lx;Zhang, Y	Ceram Acad Fine Arts	Peoples R China	We Lixin;Zhang, Yu	Computer Science, Artificial Intelligence;Computer Science, Theory & Methods;Engineering, Electrical & Electronic	Computer Science;Engineering	0	1	1	1	7	Missing Fields	Missing Fields	We, Lx (Corresponding Author), Ceram Acad Fine Arts, Jingdezhen Ceram Inst, Jingdezhen 333403, Peoples R China.			Wos:000364076000202	10.1109/Isdea.2014.194	this paper aims at establishing a ceramic pattern design system based on asp.net, to provide an effective solution for product pattern design. we combine the service model theory of asp.net with product customization features to develop corresponding pattern design modules. our work mainly includes two parts: one is aiming at the key technology of sketch plug-ins like primitives library managemen…	We, Lx	We, Lx;Research On The Key Technologies Of Ceramic Pattern Design System	198
2014	0	The Integration Of Dsm And Axiomatic Design In Product Design As Part Of An Mdm Process	Dsm;Mdm;Axiomatic Design;Design Matrix;Dmm	Missing Fields	Risk And Change Management In Complex Systems	Rizzuti, S;De Napoli, L	Univ Calabria	Italy	Rizzuti, Sergio;De Napoli, Luigi	Engineering, Industrial;Operations Research & Management Science	Engineering;Operations Research & Management Science	0	0	0	0	11	Missing Fields	Missing Fields	Rizzuti, S (Corresponding Author), Univ Calabria, Dept Mech Energy & Management Engn, Ponte Pietro Bucci 46-C, I-87036 Arcavacata Di Rende, Cosenza, Italy.			Wos:000365420300004	Missing Fields	mapping among several domains allows different aspects of the design process to be put in relation. considering that the dsm data structure is able to capture much information of a single part of the product development process, the dmm allows different domains to be linked. the first mapping matrix employed in the design process connects the functional and the physical domain. it describes how t…	Rizzuti, S	Rizzuti, S;The Integration Of Dsm And Axiomatic Design In Product Design As Part Of An Mdm Process	117
2014	4	Using Shape Grammars To Identify Salient Features In Support Of Product Family Design	Missing Fields	Generation;Language;Brand	Proceedings Of The Asme International Design Engineering Technical Conferences And Computers And Information In Engineering Conference, 2014, Vol 7	Culbertson, Td;Simpson, Tw	Penn State Univ;Philips Healthcare	Usa	Culbertson, Timothy D;Simpson, Timothy W	Engineering, Electrical & Electronic;Engineering, Mechanical	Engineering	0	3	4	3	54	Missing Fields	Missing Fields	Simpson, Tw (Corresponding Author), Penn State Univ, Mech & Ind Engn, University Pk, Pa 16802 Usa.			Wos:000380080200052	Missing Fields	product form and aesthetics play a major role in consumer preference and product differentiation. during product family design, it is important to differentiate products in the family yet similarities among some stylistic features may connote a more coherent design strategy. shape grammars offer a method for producing designs with a coherent style along with the ability to control the variation o…	Culbertson, Td	Culbertson, Td;Using Shape Grammars To Identify Salient Features In Support Of Product Family Design	159
2015	0	A Novel Shape Generation Method Applied In Product Design	Shape Extraction;Fusion Method;Shape Averaging;Spline Interpolation	Missing Fields	Proceedings Of The 5Th International Conference On Advanced Design And Manufacturing Engineering	Zhou, Y;Fan, Cx	Harbin Inst Technol	Peoples R China	Zhou, Yan;Fan, Chenxiao	Thermodynamics;Engineering, Multidisciplinary;Engineering, Industrial;Engineering, Manufacturing;Mechanics	Thermodynamics;Engineering;Mechanics	0	4	0	4	4	Missing Fields	Missing Fields	Zhou, Y (Corresponding Author), Harbin Inst Technol, Sch Mechatron Engn, Harbin 150006, Peoples R China.			Wos:000371013800063	Missing Fields	in the traditional product design method, the design method simply based on the knowledge and experience has hindered the efficiency of the product design, and it brings inconvenience to predict the tendency of the product shape. to solve this problem, a shape generation method is proposed, based on averaging algorithm and spline interpolation. a sampling method for product model based on 2d sect…	Zhou, Y	Zhou, Y;A Novel Shape Generation Method Applied In Product Design	406
2015	48	Data-Driven Finite Elements For Geometry And Material Design	Data-Driven Simulation;Finite Element Methods;Numerical Coarsening;Material Design	Deformations;Model	Acm Transactions On Graphics	Chen, Ds;Levin, Diw;Sueda, S;Matusik, W	Mit;Calif Polytech State Univ San Luis Obispo	Usa	Chen, Desai;Levin, David I W;Sueda, Shinjiro;Matusik, Wojciech	Computer Science, Software Engineering	Computer Science	0	23	55	23	38	AUG	Nsf [Ccf-1138967];Darpa [N66001-12-1-4242]	Chen, Ds (Corresponding Author), Mit, Csail, 77 Massachusetts Ave, Cambridge, Ma 02139 Usa.			Wos:000358786600040	10.1145/2766889	crafting the behavior of a deformable object is difficult-whether it is a biomechanically accurate character model or a new multimaterial 3d printable design. getting it right requires constant iteration, performed either manually or driven by an automated system. unfortunately, previous algorithms for accelerating three-dimensional finite element analysis of elastic objects suffer from expensive…	Chen, Ds	Chen, Ds;Data-Driven Finite Elements For Geometry And Material Design	378
2015	23	Data-Driven Interactive Quadrangulation	Quad Meshing;Polygon Quadrangulation;Retopology	Missing Fields	Acm Transactions On Graphics	Marcias, G;Takayama, K;Pietroni, N;Panozzo, D;Sorkine-Hornung, O;Puppo, E;Cignoni, P	Natl Inst Informat;Cnr Italy;Univ Pisa;Swiss Fed Inst Technol;Univ Genoa	Switzerland;Italy;Japan	Marcias, Giorgio;Takayama, Kenshi;Pietroni, Nico;Panozzo, Daniele;Sorkine-Hornung, Olga;Puppo, Enrico;Cignoni, Paolo	Computer Science, Software Engineering	Computer Science	1	7	24	7	25	AUG	Erc Grant Imodel [Stg-2012-306877];Eu Fp7 Project Ict Fet Harvest4D [323567];Grants-In-Aid For Scientific Research [15K15999] Funding Source: Kaken	Marcias, G (Corresponding Author), Cnr Italy, Rome, Italy.			Wos:000358786600031	10.1145/2766964	we propose an interactive quadrangulation method based on a large collection of patterns that are learned from models manually designed by artists. the patterns are distilled into compact quadrangulation rules and stored in a database. at run-time, the user draws strokes to define patches and desired edge flows, and the system queries the database to extract fitting patterns to tessellate the ske…	Marcias, G	Marcias, G;Data-Driven Interactive Quadrangulation	391
2015	18	Product Requirement Modeling And Optimization Method Based On Product Configuration Design	Product Requirement Modeling;Configuration Design;Function Structure Model;Customer Requirement	Missing Fields	Cirp 25Th Design Conference Innovative Product Creation	Wei, W;Liu, A;Lu, Scy;Wuest, T	Univ Southern Calif;Beihang Univ;Biba Bremer Inst Prod & Logist Gmbh	Germany;Usa;Peoples R China	Wei, Wei;Liu, Ang;Lu, Stephen C -Y;Wuest, Thorsten	Education, Scientific Disciplines;Engineering, Industrial;Operations Research & Management Science	Education & Educational Research;Engineering;Operations Research & Management Science	0	8	20	8	9	Missing Fields	Missing Fields	Wei, W (Corresponding Author), Beihang Univ, Sch Mech Engn & Automat, Beijing 100191, Peoples R China.			Wos:000379870600001	10.1016/J.Procir.2015.01.020	product requirement modeling is a process that the product requirement information is collected, analyzed, structured and converted to the design specification, it is the determinant of the ability to quickly respond to the diverse requirements of customers. this paper presents a product requirement modeling method based on configuration design, which uses "tabular layouts of article characterist…	Wei, W	Wei, W;Product Requirement Modeling And Optimization Method Based On Product Configuration Design	75
2015	0	Research On Design Features Of Intelligent Product Based On Big Data	Product Design;Big Data;Data Mining;Data Driven	Missing Fields	Proceedings Of The 2015 3Rd International Conference On Machinery, Materials And Information Technology Applications	Dong, K;Mao, Xd	Shanghai Nongdeli Agr Prod Co Ltd;Fengxian Dist Econ Commiss	Peoples R China	Dong, Kai;Mao, Xuedi	Automation & Control Systems;Computer Science, Theory & Methods;Engineering, Electrical & Electronic	Automation & Control Systems;Computer Science;Engineering	0	7	0	7	9	Missing Fields	Missing Fields	Dong, K (Corresponding Author), Fengxian Dist Econ Commiss, Shanghai, Peoples R China.			Wos:000371522300008	Missing Fields	at present, the products design and development of enterprises are facing more complex internal and external environment, the specific performances are the technological and economic changes, the endless innovation of competitor, the constant changing of consumer's demands. to the enterprise management, these are not only crises, but also opportunities and challenges. previously, entrepreneurs an…	Dong, K	Dong, K;Research On Design Features Of Intelligent Product Based On Big Data	322
2016	30	A Bayesian Sampling Method For Product Feature Extraction From Large-Scale Textual Data	Product Design;Product Feature Extraction;Information Retrieval;Online;Bayesian;Text Mining;Training Data;Non-I.I.D.;Keyword	Design;Size	Journal Of Mechanical Design	Lim, S;Tucker, Cs	Penn State Univ	Usa	Lim, Sunghoon;Tucker, Conrad S	Engineering, Mechanical	Engineering	1	24	34	24	38	JUN	Penn State'S Global Engagement Network (Gen) Grant	Tucker, Cs (Corresponding Author), Penn State Univ, Engn Design & Ind & Mfg Engn, University Pk, Pa 16802 Usa.			Wos:000379607900003	10.1115/1.4033238	the authors of this work propose an algorithm that determines optimal search keyword combinations for querying online product data sources in order to minimize identification errors during the product feature extraction process. data-driven product design methodologies based on acquiring and mining online product-feature-related data are presented with two fundamental challenges: (1) determining …	Lim, S	Lim, S;A Bayesian Sampling Method For Product Feature Extraction From Large-Scale Textual Data	361
2016	13	A Creative Idea Generation Methodology By Future Envisioning From The User Experience Perspective	Fuzzy Front End;Creative Problem Solving;Design Fixation;Scenario;Idea Generation Technique	Fuzzy Front-End;Product Development;Design;Innovation;Quality;Style	International Journal Of Industrial Ergonomics	Moon, H;Han, Sh	Pohang Univ Sci & Technol Postech	South Korea	Moon, Heekyung;Han, Sung H	Engineering, Industrial;Ergonomics	Engineering	4	56	15	56	83	NOV	National Research Foundation Of Korea (Nrf) Grant - Korea Government (Msip) [Nrf-2016R1A2B2011158]	Han, Sh (Corresponding Author), Pohang Univ Sci & Technol Postech, Dept Ind & Management Engn, San 31, Pohang, South Korea.			Wos:000389112600010	10.1016/J.Ergon.2016.09.012	although several studies have suggested activities of the fuzzy front end (ffe), they focus more on incremental innovation than to radical innovation. this study developed a creative idea generation methodology for the ffe of radical innovation from the user experience (ux) perspective, i.e., ux-driven idea generation methodology. based on a literature review, a creative idea generation process w…	Moon, H	Moon, H;A Creative Idea Generation Methodology By Future Envisioning From The User Experience Perspective	183
2016	14	A Regression-Based Kansei Engineering System Based On Form Feature Lines For Product Form Design	Kansei Engineering;Image Perception;Product Form Feature Lines;Multiple Linear Regression;Support Vector Regression	Affective Responses;Satisfaction;Dimensions	Advances In Mechanical Engineering	Xiong, Y;Li, Y;Pan, Py;Chen, Y	Sichuan Univ;London Metropolitan Univ	England;Peoples R China	Xiong, Yan;Li, Yan;Pan, Peiyuan;Chen, Yu	Thermodynamics;Engineering, Mechanical	Thermodynamics;Engineering	3	88	14	88	30	JUL	National Natural Science Research Foundation Of China [51205262, 51435011]	Li, Y (Corresponding Author), Sichuan Univ, Sch Mfg Sci & Engn, 24 South Sect 1,Yihuan Rd, Chengdu 610065, Peoples R China.			Wos:000385215200021	10.1177/1687814016656107	when developing new products, it is important for a designer to understand users' perceptions and develop product form with the corresponding perceptions. in order to establish the mapping between users' perceptions and product design features effectively, in this study, we presented a regression-based kansei engineering system based on form feature lines for product form design. first according …	Xiong, Y	Xiong, Y;A Regression-Based Kansei Engineering System Based On Form Feature Lines For Product Form Design	130
2016	1	Attribute And Technology Value Mapping For Conceptual Product Design Phase	Conceptual Design;Design Research;Design Optimisation;Project Management;Design	Missing Fields	Proceedings Of The Institution Of Mechanical Engineers Part C-Journal Of Mechanical Engineering Science	Georgiou, A;Haritos, G;Fowler, M;Imani, Y	Ford Motor Co Ltd;Univ Hertfordshire	England	Georgiou, Aris;Haritos, George;Fowler, Moyra;Imani, Yasmin	Engineering, Mechanical	Engineering	0	17	1	17	16	JUN	Missing Fields	Georgiou, A (Corresponding Author), Ford Motor Co Ltd, Basildon Ss15 6Ee, Essex, England.			Wos:000378786100001	10.1177/0954406215585595	the main focus of this paper is how the concept design phase of the product development process can be improved by using an objective data-driven approach in selecting a final concept design to progress further. a quantitative new test-bed product optimisation value engineering' (proven) is presented to critically assess new and evolving powertrain technologies at the concept design phase. the ne…	Georgiou, A	Georgiou, A;Attribute And Technology Value Mapping For Conceptual Product Design Phase	337
2016	2	Automated Generation Of Repeated Geometric Patterns For Customized Additively Manufactured Personal Products	Patterning;Computer-Aided Design;Bubble Packing;Tensor Field Generation;Geometric Modeling;Mass-Customization	Missing Fields	44Th North American Manufacturing Research Conference, Namrc 44	Andrade, D;He, W;Shimada, K	Carnegie Mellon Univ	Usa	Andrade, Diego;He, Wei;Shimada, Kenji	Engineering, Manufacturing	Engineering	0	1	3	1	20	Missing Fields	Missing Fields	Andrade, D (Corresponding Author), Carnegie Mellon Univ, 5000 Forbes Ave, Pittsburgh, Pa 15213 Usa.			Wos:000387592400073	10.1016/J.Promfg.2016.08.082	aesthetic patterning of free-form surfaces is difficult and time consuming, especially for a nonexpert user of a 3d computer-aided design (cad) system. this paper presents a computational method for automatically generating aesthetic patterns based on minimal user input. the system produces anisotropic geometric feature patterns in three-steps: (1) model preparation, (2) feature interpolation via…	Andrade, D	Andrade, D;Automated Generation Of Repeated Geometric Patterns For Customized Additively Manufactured Personal Products	232
2016	10	Building A Relationship Between Elements Of Product Form Features And Vocabulary Assessment Models	Shape Generation;Feature Base;Extension Engineering Method;Morphological Chart;Superiority Evaluation Method	Design;Grammar;Shape	Eurasia Journal Of Mathematics Science And Technology Education	Lo, Ch	Tunghai Univ	Taiwan	Lo, Chi-Hung	Education & Educational Research	Education & Educational Research	0	9	11	9	42	MAY	Missing Fields	Lo, Ch (Corresponding Author), Tunghai Univ, Dept Ind Design, 1727,Sec 4,Taiwan Blvd, Taichung 40704, Taiwan.			Wos:000372952300021	Missing Fields	based on the characteristic feature parameterization and the superiority evaluation method (sem) in extension engineering, a product-shape design method was proposed in this study. the first step of this method is to decompose the basic feature components of a product. after that, the morphological chart method is used to segregate the ideas so as to generate new product forms. finally, the exten…	Lo, Ch	Lo, Ch;Building A Relationship Between Elements Of Product Form Features And Vocabulary Assessment Models	425
2016	0	Color Networks Of Traditional Cultural Patterns Inspired Color Design Technology	Color Network;Traditional Culture;Pattern;Color Design	Missing Fields	2015 Advanced Design Concepts And Practice (Adcp 2015)	Liu, Xj;Zhao, Lx;Cao, Yj	Zhejiang Univ Technol	Peoples R China	Liu, Xiaojian;Zhao, Luxi;Cao, Yujing	Computer Science, Information Systems;Computer Science, Theory & Methods	Computer Science	3	12	0	12	13	Missing Fields	Chinese National Natural Science Fund [51375450];Chinese Postdoctoral Fund [134392];National Torch Project [2013Gh550958];Academy Of Finland (Aka) [134392] Funding Source: Academy Of Finland (Aka)	Liu, Xj (Corresponding Author), Zhejiang Univ Technol, Ind Design Inst, Hangzhou, Zhejiang, Peoples R China.			Wos:000400826600033	Missing Fields	many traditional chinese patterns (especially textiles) feature their unique styles of color matching. these features can bring valuable creative inspiration for the product design or graphic design. in this paper, two-pass clustering is used to extract a series of colors from a pattern library. in the first pass of clustering, several feature colors are extracted from each pattern image. the sec…	Liu, Xj	Liu, Xj;Color Networks Of Traditional Cultural Patterns Inspired Color Design Technology	214
2016	11	Curvature Manipulation Of The Spectrum Of Valence-Arousal-Related Fmri Dataset Using Gaussian-Shaped Fast Fourier Transform And Its Application To Fuzzy Kansei Adjectives Modeling	Valence-Arousal;Kansei Adjectives;Power Spectrum Density;Gaussian-Shaped Fast Fourier Transform;Adaptive Neuro Fuzzy Inference System	Visual Location Recognition;Human Brain;Processing Valence;Component Analysis;Time-Series;Classification;Segmentation;Activation;Signals;Words	Neurocomputing	He, T;Cao, Ly;Balas, Ve;Mccauley, P;Shi, Fq	Aurel Vlaicu Univ Arad;Wenzhou Med Univ;Univ Cent Florida	Usa;Peoples R China;Romania	He, Ting;Cao, Luyin;Balas, Valentina E;Mccauley, Pamela;Shi, Fuqian	Computer Science, Artificial Intelligence	Computer Science	0	39	11	39	61	JAN 22	Missing Fields	Shi, Fq (Corresponding Author), Wenzhou Med Univ, Coll Informat & Engn, Wenzhou 325035, Peoples R China.			Wos:000367276900049	10.1016/J.Neucom.2015.10.025	valence-arousal is regarded as a reflection of kansei adjectives, which is the core concept in the theory of emotional dimensions for brain recognition. this paper presents a novel method for determining the characteristics of valence-arousal-based timing signals using power spectrum density (psd) of fmri images, and gaussian filtering, segmenting, and gaussian-shaped fast fourier transform (fft)…	He, T	He, T;Curvature Manipulation Of The Spectrum Of Valence-Arousal-Related Fmri Dataset Using Gaussian-Shaped Fast Fourier Transform And Its Application To Fuzzy Kansei Adjectives Modeling	436
2016	0	Cyber-Empathic Design - A Data Driven Framework For Product Design	Missing Fields	Decision-Support;Information;Specification;Acceptance;Ease	Proceedings Of The Asme International Design Engineering Technical Conferences And Computers And Information In Engineering Conference, 2016, Vol 2A	Ghosh, Dd;Kim, J;Olewnik, A;Lakshmanan, A;Lewis, Ke	Suny Buffalo	Usa	Ghosh, Dipanjan D;Kim, Junghan;Olewnik, Andrew;Lakshmanan, Arun;Lewis, Kemper E	Engineering, Multidisciplinary;Engineering, Mechanical	Engineering	0	3	0	3	60	Missing Fields	National Science Foundation (Nsf) [Cmmi-1435479]	Ghosh, Dd (Corresponding Author), Suny Buffalo, Dept Mech & Aerosp Engn, 805 Furnas Hall, Buffalo, Ny 14260 Usa.			Wos:000393362900012	Missing Fields	one of the critical tasks in product design is to map information from the consumer space to the design space. currently, this process is largely dependent on the designer to identify and map how psychological and consumer level factors relate to engineered product attributes. in this way current methodologies lack provision to test a designer's cognitive reasoning and could therefore introduce b…	Ghosh, Dd	Ghosh, Dd;Cyber-Empathic Design - A Data Driven Framework For Product Design	118
2016	0	Data Driven Design For Reliability	Design For Reliability;Big Data;Test Design;Prior Knowledge	Missing Fields	Annual Reliability And Maintainability Symposium 2016 Proceedings	Geiger, C;Sarakakis, G	Tesla Motors;3500 Deer Creek Rd	Usa	Geiger, Celine;Sarakakis, Georgios	Engineering, Electrical & Electronic	Engineering	0	12	0	12	2	Missing Fields	Missing Fields	Geiger, C (Corresponding Author), 3500 Deer Creek Rd, Palo Alto, Ca 94304 Usa.			Wos:000383954600063	Missing Fields	reliability is one of the driving factors towards perceived product value and brand image. in addition, reliability in the automotive industry plays a crucial role for product safety. during fast-paced product development, design for reliability is essential to guarantee product reliability while maintaining short iteration times. this requires detailed knowledge of relevant failure modes, loads …	Geiger, C	Geiger, C;Data Driven Design For Reliability	291
2016	25	Data-Driven Bending Elasticity Design By Shell Thickness	Categories And Subject Descriptors (According To Acm Ccs);I;3;5 [Computer Graphics]: Computational Geometry And Object Modelingphysically Based Modeling;J;6 [Computer-Aided Engineering]: Computer-Aided Design (Cad)	Models	Computer Graphics Forum	Zhang, Xt;Le, Xy;Wu, Zh;Whiting, E;Wang, Ccl	Shanghai Jiao Tong Univ;Dartmouth Coll;Chinese Univ Hong Kong;Delft Univ Technol	Usa;Netherlands;Peoples R China	Zhang, Xiaoting;Le, Xinyi;Wu, Zihao;Whiting, Emily;Wang, Charlie C L	Computer Science, Software Engineering	Computer Science	0	29	28	29	60	AUG	Div Of Information & Intelligent Systems;Direct For Computer & Info Scie & Enginr [1464267] Funding Source: National Science Foundation	Zhang, Xt (Corresponding Author), Dartmouth Coll, Hanover, Nh 03755 Usa;Zhang, Xt (Corresponding Author), Chinese Univ Hong Kong, Hong Kong, Hong Kong, Peoples R China.			Wos:000383444500016	10.1111/Cgf.12972	we present a method to design the deformation behavior of 3d printed models by an interactive tool, where the variation of bending elasticity at different regions of a model is realized by a change in shell thickness. given a soft material to be used in 3d printing, we propose an experimental setup to acquire the bending behavior of this material on tubes with different diameters and thicknesses.…	Zhang, Xt	Zhang, Xt;Data-Driven Bending Elasticity Design By Shell Thickness	394
2016	58	Data-Driven Innovation To Capture User-Experience Product Design: An Empirical Study For Notebook Visual Aesthetics Design	User Experience;Data-Driven Innovation;Visual Aesthetics Design;Rough Set Theory;Notebook;Data Mining	Rough Set Approach;Customer Satisfaction;Decision-Making;Configuration;Extraction;Diagnosis;Tool	Computers & Industrial Engineering	Chien, Cf;Kerh, R;Lin, Ky;Yu, Api	Asia Univ;Natl Tsing Hua Univ;Natl Chung Cheng Univ	Taiwan	Chien, Chen-Fu;Kerh, Rhoann;Lin, Kuo-Yi;Yu, Annie Pei-I	Computer Science, Interdisciplinary Applications;Engineering, Industrial	Computer Science;Engineering	4	108	60	108	57	SEP	Ministry Of Science And Technology, Taiwan [Nsc 102-2221-E-007-057-My3, Most 105-2622-8-007-002-Tm1, Most 105-2410-H-468-002-My2, Most 103-2218-E-007-023, Most 105-2221-E-007-078-My3];Toward World Class University Project From Ministry Of Education [104N2074E1];Quanta Computer, Inc.	Chien, Cf (Corresponding Author), Natl Tsing Hua Univ, Dept Ind Engn & Engn Management, 101 Sect 2,Kuang Fu Rd, Hsinchu 30013, Taiwan.			Wos:000383930600013	10.1016/J.Cie.2016.07.006	visual aesthetics is a critical factor of new product design to capture customer attention and create positive emotional reaction to enhance the customer satisfaction. understanding user preferences in terms of product visual aesthetics and the factors affecting user experience (ux) is crucial for the product designers to enhance customer satisfaction. however, few studies have been done to ident…	Chien, Cf	Chien, Cf;Data-Driven Innovation To Capture User-Experience Product Design: An Empirical Study For Notebook Visual Aesthetics Design	303
2016	0	Digital Design Of Crack Patterns With Natural Impressions On Pottery	Missing Fields	Missing Fields	International Design Engineering Technical Conferences And Computers And Information In Engineering Conference, 2015, Vol 1B	Shimizu, K;Aoyama, H	Keio Univ	Japan	Shimizu, Kaoru;Aoyama, Hideki	Computer Science, Interdisciplinary Applications;Engineering, Industrial;Engineering, Mechanical	Computer Science;Engineering	0	0	0	0	7	Missing Fields	Missing Fields	Shimizu, K (Corresponding Author), Keio Univ, Lab Digital Designing & Digital Mfg, Dept Syst Design Engn, Yokohama, Kanagawa 2238522, Japan.			Wos:000379883600007	Missing Fields	with the rapid development in production technology, it is becoming increasingly difficult to identify high-quality industrial products. thus, appearance design is considered an important factor for deciding quality. there is increasing burden on the designer to develop a design that matches the preferences of a large number of consumers. for this reason, it is imperative to develop a system that…	Shimizu, K	Shimizu, K;Digital Design Of Crack Patterns With Natural Impressions On Pottery	224
2016	81	Evidence-Based Design Heuristics For Idea Generation	Creativity;Conceptual Design;Design Cognition;Design Tools;Innovation	Engineering Design;Creativity;Fixation;Analogy;Examples;Patterns	Design Studies	Yilmaz, S;Daly, Sr;Seifert, Cm;Gonzalez, R	Univ Michigan;Iowa State Univ	Usa	Yilmaz, Seda;Daly, Shanna R;Seifert, Colleen M;Gonzalez, Richard	Engineering, Multidisciplinary;Engineering, Manufacturing	Engineering	7	80	83	80	84	SEP	National Science Foundation, Engineering Design And Innovation (Edi) Grant [0927474];Direct For Education And Human Resources [1322552] Funding Source: National Science Foundation;Direct For Education And Human Resources;Division Of Undergraduate Education [1323251] Funding Source: National Science Foundation;Directorate For Engineering [0927474] Funding Source: National Science Foundation;Divisi…	Seifert, Cm (Corresponding Author), Univ Michigan, Ann Arbor, Mi 48109 Usa.			Wos:000383821800006	10.1016/J.Destud.2016.05.001	how do product designers create multiple concepts to consider? to address this question, we combine evidence from four empirical studies of design process and outcomes, including award-winning products, multiple concepts for a project by an experienced industrial designer, and concept sets from 48 industrial and engineering designers for a single design problem. this compilation of over 3450 desi…	Yilmaz, S	Yilmaz, S;Evidence-Based Design Heuristics For Idea Generation	201
2016	40	Product Family Architecture Design With Predictive, Data-Driven Product Family Design Method	Product Family Design;Clustering-Based Approach;Market-Driven Approach;Prediction Intervals;Predictive Design Analytics	High-Dimensional Data;Platform Design;Price	Research In Engineering Design	Ma, J;Kim, Hm	Korea Natl Def Univ;Univ Illinois	Usa;South Korea	Ma, Jungmok;Kim, Harrison M	Engineering, Multidisciplinary;Engineering, Industrial;Engineering, Manufacturing	Engineering	2	71	47	71	42	JAN	Missing Fields	Kim, Hm (Corresponding Author), Univ Illinois, Dept Ind & Enterprise Syst Engn, Urbana, Il 61801 Usa.			Wos:000367921400001	10.1007/S00163-015-0201-4	this article addresses the challenge of determining optimal product family architectures with customer preference data. the proposed model, predictive data-driven product family design (pdpfd), expands clustering-based approaches to incorporate a market-driven approach. the market-driven approach provides a profit model in the near future to determine the optimal position and number of product ar…	Ma, J	Ma, J;Product Family Architecture Design With Predictive, Data-Driven Product Family Design Method	298
2016	1	Research On Implementation Process From Conceptual Design To Detailed Design Of Mechanical Product	Conceptual Design;Principle Solution;Detailed Technical Solution;Modelling;Topology Optimization	Missing Fields	2015 Advanced Design Concepts And Practice (Adcp 2015)	Cao, Gz;Luo, Pf;Wei, Cg;Liang, T	Qinghua Univ;Hebei Univ Technol;South China Univ Technol	Peoples R China	Cao, Guozhong;Luo, Panfeng;Wei, Congge;Liang, Tao	Computer Science, Information Systems;Computer Science, Theory & Methods	Computer Science	0	6	1	6	17	Missing Fields	Missing Fields	Cao, Gz (Corresponding Author), South China Univ Technol, Sch Mech & Automot Engn, Guangzhou, Guangdong, Peoples R China.			Wos:000400826600005	Missing Fields	conceptual design is a process of the formation of the product principle solution, directly affects the subsequent stage of product development. to all problems of formalized expression, validation, and structural optimization in conceptual design, the paper studies the key technologies of mapping from product principle solution to detailed technical solution. firstly, study on the model and simu…	Cao, Gz	Cao, Gz;Research On Implementation Process From Conceptual Design To Detailed Design Of Mechanical Product	110
2016	2	Strategic Style Change Using Grammar Transformations	Aesthetics;Computer-Aided Design;Product Design;Shape Grammars;Style	Design;Representation;Generation;Houses	Ai Edam-Artificial Intelligence For Engineering Design Analysis And Manufacturing	Khan, S;Chase, Sc	Univ Strathclyde;Singapore Univ Technol & Design	Scotland;Singapore	Khan, Sumbul;Chase, Scott C	Computer Science, Artificial Intelligence;Computer Science, Interdisciplinary Applications;Engineering, Multidisciplinary;Engineering, Manufacturing	Computer Science;Engineering	0	11	4	11	33	NOV	Missing Fields	Khan, S (Corresponding Author), Singapore Univ Technol & Design, 3-301-11,8 Somapah Rd, Singapore 487372, Singapore.			Wos:000386196800013	10.1017/S0890060416000135	new styles can be created by modifying existing ones. in order to formalize style change using grammars, style has to be formally defined in the design language of a grammar. previous studies in the use of grammars for style change do not give explicit rationale for transformation. how would designers decide which rules to modify in a grammar to generate necessary changes in style(s) of designs? …	Khan, S	Khan, S;Strategic Style Change Using Grammar Transformations	160
2016	0	Study On Evaluation Of Product Modeling Based On Style Matching	Product Style;Model Evaluation;Kansei Engineering;Manufacturing Automation	Missing Fields	Material Engineering And Mechanical Engineering (Meme2015)	Gu, Jf;He, Cq;Yang, X	Hohai Univ	Peoples R China	Gu, Jia-Feng;He, Can-Qun;Yang, Xu	Engineering, Mechanical;Materials Science, Multidisciplinary	Engineering;Materials Science	0	5	0	5	14	Missing Fields	Graduate'S Science And Technology Innovation Project Of Hohai University [Xzx/14B001-02];Central University [2013B34214]	Gu, Jf (Corresponding Author), Hohai Univ, Sch Mech & Elect Engn, Changzhou, Jiangsu, Peoples R China.			Wos:000435485000016	Missing Fields	with the rapid development of modern manufacturing industry and maturity of the computer-aided design technology (cad), the design tends to be automotive constantly. improving the efficiency and quality of product design. early in the product development, grasp the late style of modeling correctly can improve manufacturing efficiency, produce high-quality products which will meet expectations and…	Gu, Jf	Gu, Jf;Study On Evaluation Of Product Modeling Based On Style Matching	64
2016	2	Synthesis From A Practical Perspective	Code Generation;Linear-Time Synthesis;Metamodeling;Domain-Specific Languages	Missing Fields	Leveraging Applications Of Formal Methods, Verification And Validation: Foundational Techniques, Pt I	Jörges, S;Lamprecht, Al;Margaria, T;Naujokat, S;Steffen, B	Tu Dortmund Univ;Univ Limerick	Germany;Ireland	Joerges, Sven;Lamprecht, Anna-Lena;Margaria, Tiziana;Naujokat, Stefan;Steffen, Bernhard	Computer Science, Software Engineering	Computer Science	0	1	2	1	56	Missing Fields	Missing Fields	Naujokat, S (Corresponding Author), Tu Dortmund Univ, Chair Programming Syst, Dortmund, Germany.			Wos:000389939100020	10.1007/978-3-319-47166-2_20	based on a very liberal understanding of synthesis as a generic term for techniques that generate programming artifacts from higher-level specifications, the paper discusses several corresponding facets from a practical perspective. the synthesis examples we consider comprise variations of code generation, model synthesis from temporal logic descriptions, and metamodel-based tool generation. alth…	Jörges, S	Jörges, S;Synthesis From A Practical Perspective	242
2016	3	The Matching Research Of User'S Emotional Needs Hierarchy And Product'S Modeling Characteristics	Modeling Characteristics;Image Requirements;The Mapping Mechanism;Emotional Cognition	Missing Fields	2015 Advanced Design Concepts And Practice (Adcp 2015)	Yao, X;Yi, D;Hu, Hy;Li, Yx	Xiangtan Univ	Peoples R China	Yao, Xiang;Yi, Dan;Hu, Hong-Yan;Li, Ying-Xin	Computer Science, Information Systems;Computer Science, Theory & Methods	Computer Science	0	1	3	1	11	Missing Fields	Missing Fields	Yao, X (Corresponding Author), Xiangtan Univ, Sch Mech Engn, Dept Ind Design, Xiangtan, Peoples R China.			Wos:000400826600036	Missing Fields	it is an important issue to meet the user's emotional needs effectively in product design. modeling characteristics are the major carriers to meet the user's emotional needs, and image is the representation of emotion. the ambiguity of emotion and the relevancy degree between emotion and molding characteristics are the main difficulties in modeling design to meet the user's emotional needs. in th…	Yao, X	Yao, X;The Matching Research Of User'S Emotional Needs Hierarchy And Product'S Modeling Characteristics	66
2016	70	Unison Framework Of Data-Driven Innovation For Extracting User Experience Of Product Design Of Wearable Devices	Data-Driven Innovation;User Experience;Wearable Devices;Product Design;Unison Framework;Data Mining	Consumer Response;Form;Technology;System;Configuration;Perceptions;Involvement;Aesthetics;Impact;Taste	Computers & Industrial Engineering	Lin, Ky;Chien, Cf;Kerh, R	Asia Univ;Natl Tsing Hua Univ	Taiwan	Lin, Kuo-Yi;Chien, Chen-Fu;Kerh, Rhoann	Computer Science, Interdisciplinary Applications;Engineering, Industrial	Computer Science;Engineering	3	91	72	91	78	SEP	Ministry Of Science And Technology, Taiwan [Nsc102-2622-E-007-013, Nsc102-2221-E-007-057-My3, Most105-2622-8-007-002-Tm1, Nsc105-2410-H-468-002-My2];Toward World Class University Project From The Ministry Of Education [104N2074E1];Quanta Computer, Inc.	Chien, Cf (Corresponding Author), Natl Tsing Hua Univ, Dept Ind Engn & Engn Management, 101 Sect 2 Kuang Fu Rd, Hsinchu 30013, Taiwan.			Wos:000383930600041	10.1016/J.Cie.2016.05.023	for consumer products, the time-to-market pressure and market share competition are intensive due to the shortening product life cycles. product form design that contributes to the user experience (ux) is critical to distinguish the product from others. however, few studies have been done for exploring the relationship between ux and the design of product form. to fill the gaps, this study aims t…	Lin, Ky	Lin, Ky;Unison Framework Of Data-Driven Innovation For Extracting User Experience Of Product Design Of Wearable Devices	289
2016	23	Unsupervised Texture Transfer From Images To Model Collections	Data-Driven Graphics;Shape Analysis;Appearance Transfer;Texture;Illumination	Missing Fields	Acm Transactions On Graphics	Wang, Tfy;Su, H;Huang, Qx;Huang, Jw;Guibas, L;Mitra, Nj	Ttic Ut Austin;Stanford Univ;Ucl	England;Usa	Wang, Tuanfeng Y;Su, Hao;Huang, Qixing;Huang, Jingwei;Guibas, Leonidas;Mitra, Niloy J	Computer Science, Software Engineering	Computer Science	0	19	28	19	32	NOV	Direct For Computer & Info Scie & Enginr;Div Of Information & Intelligent Systems [1546206] Funding Source: National Science Foundation;Direct For Mathematical & Physical Scien;Division Of Mathematical Sciences [1700234] Funding Source: National Science Foundation;Division Of Mathematical Sciences;Direct For Mathematical & Physical Scien [1521608] Funding Source: National Science Foundation	Wang, Tfy (Corresponding Author), Ucl, London Wc1E 6Bt, England.			Wos:000388446200019	10.1145/2980179.2982404	large 3d model repositories of common objects are now ubiquitous and are increasingly being used in computer graphics and computer vision for both analysis and synthesis tasks. however, images of objects in the real world have a richness of appearance that these repositories do not capture, largely because most existing 3d models are untextured. in this work we develop an automated pipeline capab…	Wang, Tfy	Wang, Tfy;Unsupervised Texture Transfer From Images To Model Collections	35
2016	3	View-Aware Image Object Compositing And Synthesis From Multiple Sources	Image Cloning;3D Proxy;Probabilistic Modeling;Data-Driven Method	Missing Fields	Journal Of Computer Science And Technology	Chen, X;Xu, Ww;Yeung, Sk;Zhou, K	Zhejiang Univ;Singapore Univ Technol & Design	Peoples R China;Singapore	Chen, Xiang;Xu, Wei-Wei;Yeung, Sai-Kit;Zhou, Kun	Computer Science, Hardware & Architecture;Computer Science, Software Engineering	Computer Science	0	11	3	11	48	MAY	Missing Fields	Zhou, K (Corresponding Author), Zhejiang Univ, State Key Lab Comp Aided Design & Comp Graph, Hangzhou 310058, Zhejiang, Peoples R China.			Wos:000375932200004	10.1007/S11390-016-1640-8	image compositing is widely used to combine visual elements from separate source images into a single image. although recent image compositing techniques are capable of achieving smooth blending of the visual elements from different sources, most of them implicitly assume the source images are taken in the same viewpoint. in this paper, we present an approach to compositing novel image objects fr…	Chen, X	Chen, X;View-Aware Image Object Compositing And Synthesis From Multiple Sources	43
2017	4	A Mapping Network Model Integrating Service To Warrant Function Availability Of Complex Electro-Mechanical Products	Product Service System;Pss;Mapping Network Model;Function Availability;Service Activity Chain	Systems	24Th Cirp Conference On Life Cycle Engineering	Chang, Ft;Zhou, Gh;Lu, Q	Xi An Jiao Tong Univ	Peoples R China	Chang, Fengtian;Zhou, Guanghui;Lu, Qi	Engineering, Industrial	Engineering	0	7	4	7	19	Missing Fields	Program For New Century Excellent Talents In University By China Ministry Of Education [Ncet-12-0452];Special Program For Innovation Method Of The Ministry Of Science And Technology, China [2015Im020600]	Zhou, Gh (Corresponding Author), Xi An Jiao Tong Univ, Sch Mech Engn, Xian 710049, Peoples R China;Zhou, Gh (Corresponding Author), Xi An Jiao Tong Univ, State Key Lab Mfg Syst Engn, Xian 710049, Peoples R China.			Wos:000404511900116	10.1016/J.Procir.2016.11.165	in recent years, in order to obtain value increment of enterprises, product service system (pss) that integrates products and services is attracting more and more attentions in life cycle. meanwhile, in the product usage phase, the maintenance actions undertaken in-house by customers haven't fully warranted products' availability for increasingly complex electro-mechanical products. so, for the p…	Chang, Ft	Chang, Ft;A Mapping Network Model Integrating Service To Warrant Function Availability Of Complex Electro-Mechanical Products	107
2017	0	A Mechanism For Semantic Enhanced Integrated Product Modeling In Collaborative Design Environment	Ontology;Integrated Product Modeling;Semantic Reconcile	Ontologies	2017 10Th International Congress On Image And Signal Processing, Biomedical Engineering And Informatics (Cisp-Bmei)	Lou, Yc;Ge, Gt	Zhejiang Gongshang Univ	Peoples R China	Lou, Yichao;Ge, Guangtao	Engineering, Biomedical;Engineering, Electrical & Electronic;Imaging Science & Photographic Technology	Engineering;Imaging Science & Photographic Technology	0	1	0	1	27	Missing Fields	Zhejiang Provincial Natural Science Foundation Of China [Ly14F010001]	Ge, Gt (Corresponding Author), Zhejiang Gongshang Univ, Coll Informat & Elect Engn, Hangzhou, Zhejiang, Peoples R China.			Wos:000464407100431	Missing Fields	complex product development becomes more and more knowledge-intensive. knowledge integration faces the problems of semantic ambiguity and semantic heterogeneity due to cross-functional teams and multiple cross-domain applications involved in collaborative design environment. to address these problems, this paper presents a mechanism for integrated product modeling with semantic enhancing through …	Lou, Yc	Lou, Yc;A Mechanism For Semantic Enhanced Integrated Product Modeling In Collaborative Design Environment	86
2017	1	A Probabilistic Framework For Component-Based Vector Graphics	Missing Fields	Missing Fields	Computer Graphics Forum	Lieng, H	Oslo & Akershus Univ Coll Appl Sci	Norway	Lieng, Henrik	Computer Science, Software Engineering	Computer Science	0	3	1	3	40	OCT	Missing Fields	Lieng, H (Corresponding Author), Oslo & Akershus Univ Coll Appl Sci, Oslo, Norway.			Wos:000412902600020	10.1111/Cgf.13285	we propose a framework for data-driven manipulation and synthesis of component-based vector graphics. using labelled vector graphical images of a given type of object as input, our processing pipeline produces training data, learns a probabilistic bayesian network from that training data, and offer various data-driven vector-related tools using synthesis functions. the tools ranges from data-driv…	Lieng, H	Lieng, H;A Probabilistic Framework For Component-Based Vector Graphics	400
2017	31	A Quantitative Approach To Design Alternative Evaluation Based On Data-Driven Performance Prediction	Design Alternative Evaluation;Rough Dematel;Quantitative Evaluation;Data-Driven;Performance Prediction	Support Vector Regression;Supplier Development Programs;Rough Set;Fuzzy Ahp;Customer Satisfaction;Dematel Method;Selection;Model;Vikor;Optimization	Advanced Engineering Informatics	Zhang, Zj;Gong, L;Jin, Y;Xie, J;Hao, J	Univ Southern Calif;Beijing Inst Technol	Usa;Peoples R China	Zhang, Zi-Jian;Gong, Lin;Jin, Yan;Xie, Jian;Hao, Jia	Computer Science, Artificial Intelligence;Engineering, Multidisciplinary	Computer Science;Engineering	3	60	39	60	68	APR	National Natural Science Foundation Of China [51405018];Beijing Higher Education Young Elite Teacher Project [Yetp1167];Excellent Young Scholars Research Fund Of Beijing Institute Of Technology	Gong, L (Corresponding Author), Beijing Inst Technol, Sch Mech Engn, Beijing 100081, Peoples R China.			Wos:000403859800005	10.1016/J.Aei.2016.12.009	design alternative evaluation in the early stages of engineering design plays an important role in determining the success of new product development, as it influences considerably the subsequent design activities. however, existing approaches to design alternative evaluation are overly reliant on experts' ambiguous and subjective judgments and qualitative descriptions. to reduce subjectivity and…	Zhang, Zj	Zhang, Zj;A Quantitative Approach To Design Alternative Evaluation Based On Data-Driven Performance Prediction	295
2017	28	A Research Review On The Key Technologies Of Intelligent Design For Customized Products	Customized Products;Customer Requirements;Variant Design;Intelligent Design;Knowledge Push	Quality Function Deployment;Variant Design;Genetic Algorithm;Mechanism Design;Family Design;System;Framework;Requirements;Management;Model	Engineering	Zhang, Sy;Xu, Jh;Gou, Hw;Tan, Jr	Zhejiang Univ	Peoples R China	Zhang, Shuyou;Xu, Jinghua;Gou, Huawei;Tan, Jianrong	Engineering, Multidisciplinary	Engineering	27	240	34	240	81	OCT	National Natural Science Foundation Of China [51375012, 51675478];Science And Technology Plan Project Of Zhejiang Province [2017C31002];Fundamental Research Funds For The Central Universities [2017Fza4003]	Xu, Jh (Corresponding Author), Zhejiang Univ, State Key Lab Fluid Power & Mechatron Syst, Hangzhou 310027, Zhejiang, Peoples R China.			Wos:000416286000013	10.1016/J.Eng.2017.04.005	the development of technologies such as big data and cyber-physical systems (cpss) has increased the demand for product design. product digital design involves completing the product design process using advanced digital technologies such as geometry modeling, kinematic and dynamic simulation, multi-disciplinary coupling, virtual assembly, virtual reality (vr), multi-objective optimization (moo),…	Zhang, Sy	Zhang, Sy;A Research Review On The Key Technologies Of Intelligent Design For Customized Products	345
2017	1	A Systematic Methodology For Engineered Object Design : The P-To-V Model Of Functional Innovation	Design;Methodology;Model;Operating Chart	Missing Fields	Advances On Mechanics, Design Engineering And Manufacturing	Matthews, Gs	Abc Optimal Ltd	England	Matthews, Geoffrey S	Engineering, Industrial;Engineering, Manufacturing;Engineering, Mechanical	Engineering	0	2	1	2	21	Missing Fields	Missing Fields	Matthews, Gs (Corresponding Author), Abc Optimal Ltd, Southampton So30 2Gb, Hants, England.			Wos:000392417700001	10.1007/978-3-319-45781-9_1	this paper seeks to establish the foundations of a methodology offering practical guidance to aid the innovative design of engineered object functionality. the methodology is set in a p-to-v framework. the concept of the framework is borrowed from an earlier work, but constituent elements are new. much recent work focuses on different aspects of innovation. however, there seems to be a gap for an…	Matthews, Gs	Matthews, Gs;A Systematic Methodology For Engineered Object Design : The P-To-V Model Of Functional Innovation	244
2017	6	An Approach To Computational Co-Evolutionary Product Design	Co-Evolutionary Design;Computational Design;Undirected Graph;Product Design	Slider-Crank;Optimization;Model;Transmission;Coevolution	International Journal Of Advanced Manufacturing Technology	He, B;Zhou, Gf;Hou, Sc;Zeng, Lb	Shanghai Univ;Shanghai Aerosp Syst Engn Inst	Peoples R China	He, Bin;Zhou, Gaofei;Hou, Shuangchao;Zeng, Lingbin	Automation & Control Systems;Engineering, Manufacturing	Automation & Control Systems;Engineering	1	21	6	21	32	APR	National Natural Science Foundation Of China [51675319];Ningbo Major Project Of Industrial Science And Technology [2016B10014]	He, B (Corresponding Author), Shanghai Univ, Sch Mechatron Engn & Automat, Shanghai Key Lab Intelligent Mfg & Robot, 149 Yanchang Rd, Shanghai 200072, Peoples R China.			Wos:000398997800023	10.1007/S00170-016-9295-8	computational co-evolution design provides a mechanism for searching a potential solution space according to a specified fitness function. co-evolutionary design is an approach to design problem solving in which the requirements and solutions of design evolve separately and affect each other. this paper is devoted to a new computational co-evolutionary product design approach. the undirected grap…	He, B	He, B;An Approach To Computational Co-Evolutionary Product Design	77
2017	38	Augmented Lagrangian Method For An Euler'S Elastica Based Segmentation Model That Promotes Convex Contours	Euler'S Elastica;Augmented Lagrangian Method;Image Segmentation;Convex Contour;Variational Model	Variational Approach;Image Segmentation;Active Contours;Approximation;Algorithms	Inverse Problems And Imaging	Bae, E;Tai, Xc;Zhu, W	Univ Bergen;Norwegian Def Res Estab;Univ Alabama	Norway;Usa	Bae, Egil;Tai, Xue-Cheng;Zhu, Wei	Mathematics, Applied;Physics, Mathematical	Mathematics;Physics	0	6	42	6	45	FEB	Norwegian Research Council Evita Project [214889]	Zhu, W (Corresponding Author), Univ Bergen, Dept Math, Pob 7803, N-5020 Bergen, Norway;Zhu, W (Corresponding Author), Univ Alabama, Dept Math, Box 870350, Tuscaloosa, Al 35487 Usa.			Wos:000393422400001	10.3934/Ipi.2017001	in this paper, we propose an image segmentation model where an l-1 variant of the euler's elastica energy is used as boundary regularization. an interesting feature of this model lies in its preference for convex segmentation contours. however, due to the high order and non-differentiability of euler's elastica energy, it is nontrivial to minimize the associated functional. as in recent work on t…	Bae, E	Bae, E;Augmented Lagrangian Method For An Euler'S Elastica Based Segmentation Model That Promotes Convex Contours	50
2017	20	Cyber-Empathic Design: A Data-Driven Framework For Product Design	Cyber-Empathic Design;Data-Driven Design;Design Methodology;Product Design;Product Development	Information;Specification;Acceptance	Journal Of Mechanical Design	Ghosh, D;Olewnik, A;Lewis, K;Kim, J;Lakshmanan, A	Univ Buffalo Suny	Usa	Ghosh, Dipanjan;Olewnik, Andrew;Lewis, Kemper;Kim, Junghan;Lakshmanan, Arun	Engineering, Mechanical	Engineering	8	56	23	56	77	SEP	Division Of Civil, Mechanical And Manufacturing Innovation [Cmmi-1435479];Div Of Civil, Mechanical, & Manufact Inn;Directorate For Engineering [1435479] Funding Source: National Science Foundation	Ghosh, D (Corresponding Author), Univ Buffalo Suny, Dept Mech & Aerosp Engn, 805 Furnas Hall, Buffalo, Ny 14260 Usa.			Wos:000408024600002	10.1115/1.4036780	a critical task in product design is mapping information from consumer to design space. currently, this process largely depends on designers identifying and mapping psychological and consumer level factors to engineered attributes. in this way, current methodologies lack provision to test a designer's cognitive reasoning and could introduce bias when mapping from consumer to design space. in addi…	Ghosh, D	Ghosh, D;Cyber-Empathic Design: A Data-Driven Framework For Product Design	74
2017	81	Data-Driven Guides: Supporting Expressive Design For Information Graphics	Information Graphics;Visualization;Design Tools;2D Graphics	Visual Embellishments;Visualization	Ieee Transactions On Visualization And Computer Graphics	Kim, Nw;Schweickart, E;Liu, Zc;Dontcheva, M;Li, W;Popovic, J;Pfister, H	Cornell Univ;Harvard Univ;Adobe Res	Usa	Kim, Nam Wook;Schweickart, Eston;Liu, Zhicheng;Dontcheva, Mira;Li, Wilmot;Popovic, Jovan;Pfister, Hanspeter	Computer Science, Software Engineering	Computer Science	1	19	96	19	55	JAN	Kwanjeong Educational Foundation	Kim, Nw (Corresponding Author), Harvard Univ, John Paulson Sch Engn & Appl Sci, Cambridge, Ma 02138 Usa.			Wos:000395537600052	10.1109/Tvcg.2016.2598620	in recent years, there is a growing need for communicating complex data in an accessible graphical form. existing visualization creation tools support automatic visual encoding, but lack flexibility for creating custom design; on the other hand, freeform illustration tools require manual visual encoding, making the design process time-consuming and error-prone. in this paper, we present data-driv…	Kim, Nw	Kim, Nw;Data-Driven Guides: Supporting Expressive Design For Information Graphics	7
2017	10	Data-Driven Styling: Augmenting Intuition In The Product Design Process Using Holistic Styling Analysis	Missing Fields	Shape;Brand;Gestalt;Unity	Journal Of Mechanical Design	Ranscombe, C;Kinsella, P;Blijlevens, J	Rmit Univ;Swinburne Univ Technol	Australia	Ranscombe, Charlie;Kinsella, Philip;Blijlevens, Janneke	Engineering, Mechanical	Engineering	2	31	10	31	44	NOV	Swinburne University Of Technology Centre For Design Innovation	Ranscombe, C (Corresponding Author), Swinburne Univ Technol, Ctr Design Innovat, Dept Interior Architecture & Ind Design, Hawthorn, Vic 3122, Australia.			Wos:000417294300018	10.1115/1.4037249	styling or product appearance is well known for holding great influence on its differentiation, branding, and overall success in the market. however, the styling process is difficult due to the intuitive and subjective way in which designers evaluate designs. in particular, negotiating iterations between designers and engineers is challenging since engineers have objective, data-driven approaches…	Ranscombe, C	Ranscombe, C;Data-Driven Styling: Augmenting Intuition In The Product Design Process Using Holistic Styling Analysis	251
2017	3	Design Capabilities In Software Innovation Settings	Missing Fields	Product Development;Dynamic Capabilities;Technology;Management;Creativity;Advantage;Firm;Knowledge;Framework;Patterns	2017 Portland International Conference On Management Of Engineering And Technology (Picmet)	Zapata-Roldan, F	Univ Pontificia Bolivariana;Univ Bridgeport	Usa;Colombia	Zapata-Roldan, Felipe	Engineering, Electrical & Electronic	Engineering	0	9	4	9	28	Missing Fields	Missing Fields	Zapata-Roldan, F (Corresponding Author), Univ Bridgeport, Technol Management Dept, Bridgeport, Ct 06604 Usa;Zapata-Roldan, F (Corresponding Author), Univ Pontificia Bolivariana, Escuela Arquitectura & Diseno, Medellin, Colombia.			Wos:000419843900148	Missing Fields	the border between tangible and digital products is getting more diffuse, and the design methodologies are converging to a more comprehensive and holistic approach in that sense. the output of these novel innovation processes is often a digital entity like an app or a physical object. for users and consumers, it is important to keep a fluid interface between hardware and software assuring a prope…	Zapata-Roldan, F	Zapata-Roldan, F;Design Capabilities In Software Innovation Settings	221
2017	6	Design Patterns For Visualization-Based Tools In Sustainable Product Design	Missing Fields	Life-Cycle Assessment;Information Visualization;Environmental Impacts;Visual Analytics;System;Aid	Proceedings Of The Asme International Design Engineering Technical Conferences And Computers And Information In Engineering Conference, 2017, Vol 4	Ramanujan, D;Bernstein, Wz;Ramani, K	Nist;Mit;Purdue Univ	Usa	Ramanujan, Devarajan;Bernstein, William Z;Ramani, Karthik	Engineering, Manufacturing;Engineering, Mechanical	Engineering	0	2	6	2	62	Missing Fields	Nsf [Eec 0935074, Cmmi 110619];Tata Design Innovation Grant	Ramanujan, D (Corresponding Author), Mit, Dept Mech Engn, Cambridge, Ma 02139 Usa.			Wos:000423244100042	Missing Fields	most design activities involve exploring and comparing existing designs. thus, adopting an eco-conscious approach in the design exploration process can aid environmentally sustainable product design (spd). one approach for supporting exploration in spd is through tools based on information visualization (infovis). the use of infows for spd allows data-driven exploration of solutions that is rapid…	Ramanujan, D	Ramanujan, D;Design Patterns For Visualization-Based Tools In Sustainable Product Design	357
2017	31	Developing A Mapping From Affective Words To Design Parameters For Affective Design Of Apparel Products	Affective;Apparel;Design Parameter;Neural Networks;Validation	Decision-Support-System;Neural-Network	Textile Research Journal	Zhao, Y;Sun, J;Gupta, Mm;Moody, W;Laverty, Wh;Zhang, Wj	East China Univ Sci & Technol;Cambridge Sch Art;Univ Saskatchewan;Southwest Univ	England;Canada;Peoples R China	Zhao, Yu;Sun, Jian;Gupta, Madan M;Moody, Wendy;Laverty, William H;Zhang, Wenjun	Materials Science, Textiles	Materials Science	1	16	31	16	47	NOV	Missing Fields	Zhang, Wj (Corresponding Author), 105 Adm Pl, Saskatoon, Sk S7N 5A2, Canada.			Wos:000414429800005	10.1177/0040517516669072	the development of an emotion-based (or affect-based) apparel design system has become an important issue nowadays due to the customer's increased demand for apparel products not only in the aspect of function but also of aesthetics or affect/emotion. this paper presents a study on developing a mapping from affective words to design parameters. the technique employed to develop this mapping is ne…	Zhao, Y	Zhao, Y;Developing A Mapping From Affective Words To Design Parameters For Affective Design Of Apparel Products	88
2017	7	Dynamic Customer Preference Analysis For Product Portfolio Identification Using Sequential Pattern Mining	Customer Need;Product Family Design;Product Portfolio Identification;Product Specification;Sequential Pattern Mining	Rough Set;Platform Design;Family Design;Customization;Architecture;Methodology;Definition;Algorithm	Industrial Management & Data Systems	Yu, L;Zhang, Zf;Shen, J	Shanghai Univ;Shanghai Univ Finance & Econ;Shanghai Dianji Univ	Peoples R China	Yu, Li;Zhang, Zaifang;Shen, Jin	Computer Science, Interdisciplinary Applications;Engineering, Industrial	Computer Science;Engineering	2	35	7	35	38	Missing Fields	National Natural Science Foundation Of China [71101084, 51205242, 71401099];Natural Science Foundation Of Shanghai [11Zr1411800]	Yu, L (Corresponding Author), Shanghai Univ Finance & Econ, Shanghai Key Lab Financial Informat Technol, Shanghai, Peoples R China.			Wos:000399073200007	10.1108/Imds-12-2015-0496	purpose - in the initial stage of product design, product portfolio identification (ppi) aims to translate customer needs (cns) into product specifications (pss). this is an essential task, since understanding what customers really want is at the center of product design. however, design information is incomplete and design knowledge is minimal during this stage. furthermore, ppi is often a confu…	Yu, L	Yu, L;Dynamic Customer Preference Analysis For Product Portfolio Identification Using Sequential Pattern Mining	200
2017	3	Early Stage Hot Spot Analysis Through Standard Cell Base Random Pattern Generation	Process Optimization;Lithography Hotspot Candidate Patterns;Layout Schema Generator (Lsg);Pattern Scoring	Missing Fields	Design-Process-Technology Co-Optimization For Manufacturability Xi	Jeon, Jw;Song, J;Kim, Jl;Park, S;Yang, Sh;Lee, S;Kang, Hk;Madkour, K;Elmanhawy, W;Lee, S;Kwan, J	Mentor Graph Corp;Samsung Elect Co Ltd;Heliopolis	Usa;South Korea;Egypt	Jeon, Joong-Won;Song, Jaewan;Kim, Jeong-Lim;Park, Seongyul;Yang, Seung-Hune;Lee, Sooryong;Kang, Ho-Kyu;Madkour, Kareem;Elmanhawy, Wael;Lee, Seungjo;Kwan, Joe	Optics	Optics	0	2	3	2	2	Missing Fields	Missing Fields	Jeon, Jw (Corresponding Author), Samsung Elect Co Ltd, 1 Samsungjeonja Ro, Hwaseong Si 18448, Gyeonggi Do, South Korea.			Wos:000405560100025	10.1117/12.2257830	due to limited availability of drc clean patterns during the process and ret recipe development, opc recipes are not tested with high pattern coverage. various kinds of pattern can help opc engineer to detect sensitive patterns to lithographic effects. random pattern generation is needed to secure robust opc recipe. however, simple random patterns without considering real product layout style can…	Jeon, Jw	Jeon, Jw;Early Stage Hot Spot Analysis Through Standard Cell Base Random Pattern Generation	187
2017	0	Feature Recognition And Parameterization Methods For Algorithm-Based Product Development Process	Cad;Feature Recognition;Algorithm-Based Product Development Process	Missing Fields	Proceedings Of The Asme International Design Engineering Technical Conferences And Computers And Information In Engineering Conference, 2017, Vol 1	Martins, Tw;Anderl, R	Tech Univ Darmstadt	Germany	Martins, Thiago Weber;Anderl, Reiner	Engineering, Industrial;Engineering, Mechanical	Engineering	0	1	0	1	28	Missing Fields	German Research Foundation (Deutsche Forschungsgemeinschaft, Abbr.: Dfg);Dfg	Martins, Tw (Corresponding Author), Tech Univ Darmstadt, Fac Mech Engn, Dept Comp Integrated Design, Otto Berndt Str 2, D-64287 Darmstadt, Germany.			Wos:000423243500006	Missing Fields	the algorithm-based product development process applies mathematical optimization tools in the conceptual steps of the product development process. it relies on formalized data such as initial loads and boundary conditions to find the best product solution for optimized bifurcated sheet metal parts. previous research efforts focused on the automation of cad modeling steps. current algorithms are …	Martins, Tw	Martins, Tw;Feature Recognition And Parameterization Methods For Algorithm-Based Product Development Process	429
2017	4	Generative Shape Design Using 3D Spatial Grammars, Simulation And Optimization	Missing Fields	Algorithm	Design Computing And Cognition '16	Zimmermann, L;Chen, T;Shea, K	Eth Zuerich	Switzerland	Zimmermann, Luca;Chen, Tian;Shea, Kristina	Computer Science, Artificial Intelligence;Computer Science, Theory & Methods;Neurosciences	Computer Science;Neurosciences & Neurology	0	6	4	6	39	Missing Fields	Missing Fields	Zimmermann, L (Corresponding Author), Eth Zuerich, Zurich, Switzerland.			Wos:000454343400016	10.1007/978-3-319-44989-0_16	advancements in 3d printers are challenging engineers to design ever more complex, customizable and unique products. this paper presents a method that facilitates design by combining 3d spatial grammars, structural simulation and optimization. the proposed method is generic and illustrated here through the design of wheels for inline skates since they have both aesthetic and functional requiremen…	Zimmermann, L	Zimmermann, L;Generative Shape Design Using 3D Spatial Grammars, Simulation And Optimization	435
2017	7	Generative Software Product Line Development Using Variability-Aware Design Patterns	Missing Fields	Implementation;Java	Computer Languages Systems & Structures	Seidl, C;Schuster, S;Schaefer, I	Tech Univ Carolo Wilhelmina Braunschweig	Germany	Seidl, Christoph;Schuster, Sven;Schaefer, Ina	Computer Science, Software Engineering	Computer Science	0	28	8	28	57	JUN	Dfg (German Research Foundation) [Scha1635/2-2];European Commission [H2020-644298]	Seidl, C (Corresponding Author), Tech Univ Carolo Wilhelmina Braunschweig, Braunschweig, Germany.			Wos:000392162400006	10.1016/J.Cl.2016.08.006	software product lines (spls) are an approach to reuse in-the-large that models a set of closely related software systems in terms of commonalities and variabilities. design patterns are best practices for addressing recurring design problems in object-oriented source code. in the practice of implementing spl, instances of certain design patterns are employed to handle variability, which makes th…	Seidl, C	Seidl, C;Generative Software Product Line Development Using Variability-Aware Design Patterns	204
2017	2	Innovating Trend Research Practice Through A Data Driven-Approach: A Blended Experience Within The Design Field	Metadesign;Design Trend Research;Data-Driven Technology;Social Media;Concept Development	Missing Fields	10Th International Conference Of Education, Research And Innovation (Iceri2017)	Celi, M;Colombi, C	Politecn Milan	Italy	Celi, Manuela;Colombi, Chiara	Education & Educational Research	Education & Educational Research	1	10	2	10	30	Missing Fields	Farb - University Fund For Basic Research, Design Dept. - Politecnico Di Milano;Nextatlas	Celi, M (Corresponding Author), Politecn Milan, Design Dept, Milan, Italy.			Wos:000429975306099	Missing Fields	in the last decade, the design practice has been widely crossing disciplines and their inputs, acting as a mediator among fine arts, humanities, economics, technology and engineering sciences. not only the cross-fertilization among methodologies and research tools has empowered design practice's ability to modeling cultural contexts but also web 2.0, social media and big data has dramatically cha…	Celi, M	Celi, M;Innovating Trend Research Practice Through A Data Driven-Approach: A Blended Experience Within The Design Field	252
2017	2	Product Data Model For Performance-Driven Design	Complex Product Design;Performance Driven;Data Model;Mapping Relationship;High-Speed Train	Missing Fields	Chinese Journal Of Mechanical Engineering	Hu, Gz;Xu, Xj;Xiao, Sn;Yang, Gw;Pu, F	Southwest Jiaotong Univ;Sichuan Univ Sci & Engn	Peoples R China	Hu, Guang-Zhong;Xu, Xin-Jian;Xiao, Shou-Ne;Yang, Guang-Wu;Pu, Fan	Engineering, Mechanical	Engineering	4	33	2	33	32	SEP	National Natural Science Foundation Of China [51275432, 51505390];Sichuan Application Foundation Projects [2016Jy0098];Independent Research Project Of Tpl [Tpl1501]	Hu, Gz (Corresponding Author), Sichuan Univ Sci & Engn, Sch Mech Engn, Zigong 643000, Peoples R China.			Wos:000408620300009	10.1007/S10033-017-0173-6	when designing large-sized complex machinery products, the design focus is always on the overall performance; however, there exist no design theory and method based on performance driven. in view of the deficiency of the existing design theory, according to the performance features of complex mechanical products, the performance indices are introduced into the traditional design theory of "requir…	Hu, Gz	Hu, Gz;Product Data Model For Performance-Driven Design	80
2017	0	Proposal Of Delta Design Map Based On Function, Behavior, Structure And User Experience For Design Ideation Support	Missing Fields	Missing Fields	Proceedings Of The Asme International Design Engineering Technical Conferences And Computers And Information In Engineering Conference, 2017, Vol 7	Murakami, T;Koyanagi, T	Univ Tokyo	Japan	Murakami, Tamotsu;Koyanagi, Tomoyuki	Engineering, Industrial;Engineering, Mechanical	Engineering	0	1	0	1	20	Missing Fields	Jsps [16K12668];Grants-In-Aid For Scientific Research [16K12668] Funding Source: Kaken	Murakami, T (Corresponding Author), Univ Tokyo, Dept Mech Engn, Bunkyo Ku, Tokyo 1138656, Japan.			Wos:000423244500008	Missing Fields	in the present competitive business environment, designers and engineers need to come up with creative, innovative and valuable design ideas. in engineering design, the function (f), behavior (b) and structure (s) of a product are discussed using design theory and methodology. on the other hand, the concept of user experience (ux) is becoming important in product design. in this paper, we first d…	Murakami, T	Murakami, T;Proposal Of Delta Design Map Based On Function, Behavior, Structure And User Experience For Design Ideation Support	127
2017	0	Research On Attractive Factors Of Electric Motorcycle Design	Electric Motorcycle;Kansei Engineering;Quantification Theory Type I (Qtt-I);Product Design	Missing Fields	Transdisciplinary Engineering: A Paradigm Shift	Zhang, Zh;Ding, W;Cheng, Jx;Ye, Jn;Li, Ty	East China Univ Sci & Technol	Peoples R China	Zhang, Ziheng;Ding, Wei;Cheng, Jianxin;Ye, Junnan;Li, Tengye	Engineering, Industrial	Engineering	0	6	0	6	13	Missing Fields	Missing Fields	Zhang, Zh (Corresponding Author), East China Univ Sci & Technol, Sch Art Design & Media, Shanghai, Peoples R China.			Wos:000449466100031	10.3233/978-1-61499-779-5-269	.abstract goes herelectric motorcycle has become the most popular vehicle for people to travel in the short distance due to its convenience and the environmentally friendly design. with the development of the renewable energy techniques, the electric motorcycle was designed to obtain more flexibility compared to the traditional generation. considering the situation where the product just appeared…	Zhang, Zh	Zhang, Zh;Research On Attractive Factors Of Electric Motorcycle Design	164
2017	8	Trajectory Generation And Planning For Simultaneous 3D Printing Of Multiple Objects	Additive Manufacturing;Fused Filament Fabrication;3D Printer;Path Generation And Planning;Transition Travel	Missing Fields	2017 Ieee 26Th International Symposium On Industrial Electronics (Isie)	Luo, Rc;Tseng, Pk	Natl Taiwan Univ	Taiwan	Luo, Ren C;Tseng, Po-Kai	Engineering, Electrical & Electronic	Engineering	0	20	9	20	12	Missing Fields	Missing Fields	Luo, Rc (Corresponding Author), Natl Taiwan Univ, Dept Elect Engn, Taipei, Taiwan.			Wos:000426794000181	Missing Fields	additive manufacturing (am) technologies not only reduce the new product development cycle, but also allow users to design models of their own style. fused filament fabrication is a method that builds a model of rapid prototyping and product in customization fashion. with path generation and planning methods for additive manufacturing, common 3d printers print an object layer by layer. however, w…	Luo, Rc	Luo, Rc;Trajectory Generation And Planning For Simultaneous 3D Printing Of Multiple Objects	181
2018	17	A Data-Driven Framework To New Product Demand Prediction: Integrating Product Differentiation And Transfer Learning Approach	Demand Prediction;Demand-Differentiation Index;Life-Cycle Demand;New Product Development;Product Differentiation;Transfer Learning	Industrial-Design;Commonality;Sales;Inventory;Systems;Management;Innovation;Forecasts;Models;Impact	Expert Systems With Applications	Afrin, K;Nepal, B;Monplaisir, L	Wayne State Univ;Texas A&M Univ	Usa	Afrin, Kahkashan;Nepal, Bimal;Monplaisir, Leslie	Computer Science, Artificial Intelligence;Engineering, Electrical & Electronic;Operations Research & Management Science	Computer Science;Engineering;Operations Research & Management Science	4	117	19	117	47	OCT 15	Missing Fields	Nepal, B (Corresponding Author), Texas A&M Univ, Dept Engn Technol & Ind Distribut, 3367 Tamu, College Stn, Tx 77843 Usa.			Wos:000436222400019	10.1016/J.Eswa.2018.04.032	predicting the demand for a new product at early stages is crucial in determining successful product designs. however, the lack of market and consumer related data during the early stages make demand prediction incredibly difficult and unreliable, often underestimating or overestimating the product's demand. with increasing global competition and shortening product life-cycle, almost all the new …	Afrin, K	Afrin, K;A Data-Driven Framework To New Product Demand Prediction: Integrating Product Differentiation And Transfer Learning Approach	329
2018	29	A Shape Sampling Technique Via Particle Tracing For Cad Models	Computer-Aided Design;Generative Design;Constraint-Based Sampling;Shape Space	Designs;Generation;Exploration;Points;Mesh	Graphical Models	Gunpinar, E;Gunpinar, S	Istanbul Tech Univ	Turkey	Gunpinar, Erkan;Gunpinar, Serkan	Computer Science, Software Engineering	Computer Science	1	19	29	19	43	MAR	Scientific And Technological Research Council Of Turkey [315M077]	Gunpinar, E (Corresponding Author), Istanbul Tech Univ, Sch Mech Engn, Istanbul, Turkey.			Wos:000428188700002	10.1016/J.Gmod.2018.01.003	in this paper, a shape sampling approach is proposed for cad products that can be used to suggest innovative product shapes to designers and consumers. these shapes are intended to inspire designers and can be employed during the design process. for a given set of geometric parameters defining the product shapes, parameter relationships (i.e., geometric constraints), and parameter ranges, a parti…	Gunpinar, E	Gunpinar, E;A Shape Sampling Technique Via Particle Tracing For Cad Models	426
2018	4	A Systematic Optimization Design Method For Complex Mechatronic Products Design And Development	Missing Fields	High-Speed Train;Multidisciplinary Design;Sensitivity-Analysis	Mathematical Problems In Engineering	Jiang, J;Ding, Gf;Zhang, J;Zou, Ys;Qin, Sf	Southwest Jiaotong Univ;Northumbria Univ	England;Peoples R China	Jiang, Jie;Ding, Guofu;Zhang, Jian;Zou, Yisheng;Qin, Shengfeng	Engineering, Multidisciplinary;Mathematics, Interdisciplinary Applications	Engineering;Mathematics	9	53	4	53	35	Missing Fields	National Natural Science Fund Of Intelligent Mapping Research For Requirement Driven Fine Design Process Of High-Speed Railway Vehicle, China [51575461]	Zhang, J (Corresponding Author), Southwest Jiaotong Univ, Sch Mech Engn, Chengdu 610031, Sichuan, Peoples R China;Qin, Sf (Corresponding Author), Northumbria Univ, Dept Design, Newcastle Upon Tyne Ne1 8St, Tyne & Wear, England.			Wos:000425821600001	10.1155/2018/3159637	designing a complex mechatronic product involves multiple design variables, objectives, constraints, and evaluation criteria as well as their nonlinearly coupled relationships. the design space can be very big consisting of many functional design parameters, structural design parameters, and behavioral design (or running performances) parameters. given a big design space and inexplicit relations …	Jiang, J	Jiang, J;A Systematic Optimization Design Method For Complex Mechatronic Products Design And Development	349
2018	3	Automatic Graspability Map Generation Based On Shape-Primitives For Unknown And Familiar Objects	Robotic Manipulators;Grasping;Graspability Map	Grasp Synthesis;Gripper Design;Task	Robotics And Autonomous Systems	Eizicovits, D;Berman, S	Ben Gurion Univ Negev	Israel	Eizicovits, Danny;Berman, Sigal	Automation & Control Systems;Computer Science, Artificial Intelligence;Robotics	Automation & Control Systems;Computer Science;Robotics	0	19	3	19	44	DEC	Ben-Gurion Paul Ivanier Center For Production Management, Israel;Helmsley Charitable Trust, Usa Through The Agricultural, Biological And Cognitive Robotics Center At Ben-Gurion University Of The Negev, Israel	Berman, S (Corresponding Author), Ben Gurion Univ Negev, Dept Ind Engn & Management, Pob 653, Il-84105 Beer Sheva, Israel.			Wos:000451791600001	10.1016/J.Robot.2018.09.001	determining goal configurations that lead to successful grasps is a critical, time-consuming stage in reach-to-grasp planning, especially in unstructured, cluttered environments. while traditional, analytic algorithms are computation intensive and susceptible to uncertainty, modern, data-driven algorithms do not offer success guarantees and require large datasets for learning models of reach-to-g…	Eizicovits, D	Eizicovits, D;Automatic Graspability Map Generation Based On Shape-Primitives For Unknown And Familiar Objects	23
2018	18	Balancing Homogeneity And Heterogeneity In Design Exploration By Synthesizing Novel Design Alternatives Based On Genetic Algorithm And Strategic Styling Decision	Computational Design;Design Alternative;Design Exploration;Styling Strategy;Design Synthesis;Family Look	Concept Generation;Product;Form;Support;Model	Advanced Engineering Informatics	Hyun, Kh;Lee, Jh	Hanyang Univ;Korea Adv Inst Sci & Technol	South Korea	Hyun, Kyung Hoon;Lee, Ji-Hyun	Computer Science, Artificial Intelligence;Engineering, Multidisciplinary	Computer Science;Engineering	4	37	20	37	57	OCT	Hanyang University	Lee, Jh (Corresponding Author), Korea Adv Inst Sci & Technol, Grad Sch Culture Technol, Daejeon 305701, South Korea.			Wos:000454378700010	10.1016/J.Aei.2018.06.005	designers constantly and consistently draft and develop both general concepts and directions to identify the solution that best fits the styling objectives of the lead designer. designers often confront design fixations that cognitively clash to explore different design combinations. as design teams explore the range of possible design spaces of a certain design strategy, there is an opportunity …	Hyun, Kh	Hyun, Kh;Balancing Homogeneity And Heterogeneity In Design Exploration By Synthesizing Novel Design Alternatives Based On Genetic Algorithm And Strategic Styling Decision	152
2018	2	Data-Driven Logotype Design	Dynamic Visual Identity;Generative Typography;Type Design;Information Visualisation;Graphic Design	Missing Fields	2018 22Nd International Conference Information Visualisation (Iv)	Parente, J;Martins, T;Bicker, J	Univ Coimbra	Portugal	Parente, Jessica;Martins, Tiago;Bicker, Joao	Computer Science, Theory & Methods	Computer Science	0	7	2	7	12	Missing Fields	Fundacao Para A Ciencia E Tecnologia (Fct), Portugal [Sfrh/Bd/105506/2014];Fundação Para A Ciência E A Tecnologia [Sfrh/Bd/105506/2014] Funding Source: Fct	Parente, J (Corresponding Author), Univ Coimbra, Cisuc, Dept Informat Engn, Coimbra, Portugal.			Wos:000460565700013	10.1109/Iv.2018.00022	this work explores the intersection of type design, visual identity, and information visualisation. we study how data can influence the logotype design, and how a logotype can convey information. to do this, we developed a data-driven logotype for each faculty of our institution, the university of coimbra, in portugal. the design of the glyphs, or letterforms, that compose the logotypes, is influ…	Parente, J	Parente, J;Data-Driven Logotype Design	381
2018	0	Data-Driven Shoe Last Generation Based On Preference-Aware Gan	3D Compression;Gan;Shoe Last;Comfort Level Prediction	Missing Fields	2018 Ieee International Conference On Multimedia & Expo Workshops (Icmew 2018)	Huang, S;Dong, Yl;Wang, Z;Jiang, Y;Zhang, X;Gao, R	Epoque;Tsinghua Univ	Peoples R China	Huang, Shan;Dong, Yanlong;Wang, Zhi;Jiang, Yong;Zhang, Xu;Gao, Rui	Computer Science, Hardware & Architecture;Computer Science, Information Systems;Engineering, Electrical & Electronic	Computer Science;Engineering	3	9	0	9	11	Missing Fields	National Natural Science Foundation Of China [61771273, 61773229];Shenzhen Province Basic Research Foundation [Jcyj20170307153157440]	Huang, S (Corresponding Author), Tsinghua Univ, Beijing, Peoples R China.			Wos:000465249700082	Missing Fields	recent years have witnessed an increasing growth of customization in traditional computer-aided design and manufacturing, in which customized shoe last making has long been a pain to designers. conventional last making solutions are not able to provide satisfactory comfortableness because they cannot take individuals' preferences into consideration. in this paper, we propose a data-driven approac…	Huang, S	Huang, S;Data-Driven Shoe Last Generation Based On Preference-Aware Gan	13
2018	0	Design Of A Hand Rehabilitation Device Using Integrated Axiomatic And Benchmarking Methods	Product Design;Axiomatic Design;Benchmarking;Hand Rehabilitation	Exoskeleton;Quality;Model	6Th Cirp Global Web Conference - Envisaging The Future Manufacturing, Design, Technologies And Systems In Innovation Era (Cirpe 2018)	Yang, J;Peng, Qj;Zhang, J;Gu, Ph	Shantou Univ;Univ Manitoba	Canada;Peoples R China	Yang, Jun;Peng, Qingjin;Zhang, Jian;Gu, Peihua	Engineering, Industrial;Engineering, Manufacturing	Engineering	1	15	1	15	31	Missing Fields	National Natural Science Foundation Of China [51375287, 51505269];Sailing Talent Project Of Guangdong Province, China;Pearl River Scholar Project Of Guangdong Province, China;Science And Technologies Program Of Guangdong Province, China [2017B090922008]	Peng, Qj (Corresponding Author), Univ Manitoba, Dept Mech Engn, Winnipeg, Mb R3T 5V6, Canada.			Wos:000471250900051	10.1016/J.Procir.2018.09.064	the diversity of users and market requires that product must be developed based on the customer need. it is a challenge for designers to fully understand the customer need in the product development. traditional methods of the product development rely on designers' experience. it is difficulty to generate a consistent design solution by different designers. this paper introduces an integrated app…	Yang, J	Yang, J;Design Of A Hand Rehabilitation Device Using Integrated Axiomatic And Benchmarking Methods	125
2018	1399	Digital Twin-Driven Product Design, Manufacturing And Service With Big Data	Digital Twin;Product Lifecycle;Design;Manufacturing;Service;Big Data;Cyber And Physical Convergence	Life-Cycle Management	International Journal Of Advanced Manufacturing Technology	Tao, F;Cheng, Jf;Qi, Ql;Zhang, M;Zhang, H;Sui, Fy	Beihang Univ	Peoples R China	Tao, Fei;Cheng, Jiangfeng;Qi, Qinglin;Zhang, Meng;Zhang, He;Sui, Fangyuan	Automation & Control Systems;Engineering, Manufacturing	Automation & Control Systems;Engineering	163	2472	1574	2472	33	FEB	National Natural Science Foundation Of China (Nsfc) [51522501];National Key Research And Development Program Of China [2016Yfb1101700];Beijing Nova Program In China [Z161100004916063]	Tao, F (Corresponding Author), Beihang Univ, Sch Automat Sci & Elect Engn, Beijing 100191, Peoples R China.			Wos:000425592900043	10.1007/S00170-017-0233-1	nowadays, along with the application of new-generation information technologies in industry and manufacturing, the big data-driven manufacturing era is coming. however, although various big data in the entire product lifecycle, including product design, manufacturing, and service, can be obtained, it can be found that the current research on product lifecycle data mainly focuses on physical produ…	Tao, F	Tao, F;Digital Twin-Driven Product Design, Manufacturing And Service With Big Data	355
2018	38	Infonice: Easy Creation Of Information Graphics	Infographics;Visualization;Design Tools	Visual Embellishments;Visualization;Design	Proceedings Of The 2018 Chi Conference On Human Factors In Computing Systems (Chi 2018)	Wang, Y;Zhang, Hd;Huang, H;Chen, X;Yin, Qf;Hou, Zt;Zhang, Dm;Luo, Q;Qu, Hm	Microsoft Res;Hong Kong Univ Sci & Technol;Peking Univ	Usa;Peoples R China	Wang, Yun;Zhang, Haidong;Huang, He;Chen, Xi;Yin, Qiufeng;Hou, Zhitao;Zhang, Dongmei;Luo, Qiong;Qu, Huamin	Computer Science, Cybernetics;Computer Science, Information Systems	Computer Science	1	6	44	6	41	Missing Fields	Hk Itf Grant [Its/306/15Fp];National Basic Research Program Of China (973 Program) [2014Cb340304]	Wang, Y (Corresponding Author), Hong Kong Univ Sci & Technol, Hong Kong, Peoples R China.			Wos:000509673104016	10.1145/3173574.3173909	information graphics are widely used to convey messages and present insights in data effectively. however, creating expressive data-driven infographics remains a great challenge for general users without design expertise. we present infonice, a visualization design tool that enables users to easily create data-driven infographics. infonice allows users to convert unembellished charts into infogra…	Wang, Y	Wang, Y;Infonice: Easy Creation Of Information Graphics	401
2018	28	Merging <I>K</I>-Means With Hierarchical Clustering For Identifying General-Shaped Groups	Complete Linkage;Distance Measure;Hierarchical Clustering;K-Means Algorithm;Single Linkage	Mixture Components;Data Set;Number	Stat	Peterson, Ad;Ghosh, Ar;Maitra, R	Iowa State Univ	Usa	Peterson, Anna D;Ghosh, Arka R;Maitra, Ranjan	Statistics & Probability	Mathematics	2	11	30	11	36	Missing Fields	National Science Foundation (Nsf) [Dms-0707069, Dms-Career-0437555];National Institutes Of Health [R21Eb0126212]	Maitra, R (Corresponding Author), Iowa State Univ, Dept Stat, Ames, Ia 50011 Usa.			Wos:000453887800037	10.1002/Sta4.172	clustering partitions a dataset such that observations placed together in a group are similar but different from those in other groups. hierarchical and k-means clustering are two approaches but have different strengths and weaknesses. for instance, hierarchical clustering identifies groups in a tree-like structure but suffers from computational complexity in large datasets, while k-means cluster…	Peterson, Ad	Peterson, Ad;Merging <I>K</I>-Means With Hierarchical Clustering For Identifying General-Shaped Groups	32
2018	0	Modular Design Of Data-Driven Analytics Models In Smart-Product Development	Smart Product Development;Analytics Model Modularity;Unmanned Aircraft Systems;Product Autonomy;Product Intelligence	Architecture	Proceedings Of The Asme International Mechanical Engineering Congress And Exposition, 2017, Vol 11	Li, Yp;Roy, U;Saltz, Js	Syracuse Univ	Usa	Li, Yunpeng;Roy, Utpal;Saltz, Jeffrey S	Engineering, Industrial;Engineering, Manufacturing;Engineering, Mechanical	Engineering	0	8	0	8	24	Missing Fields	Center For Advanced Systems And Engineering (Case) At Syracuse University;United States National Institute Of Standards And Technology (Nist)	Li, Yp (Corresponding Author), Syracuse Univ, Dept Mech & Aerosp Engn, Syracuse, Ny 13244 Usa.			Wos:000428711400022	Missing Fields	data-driven analytics models have been built as critical components of a smart product to enable product autonomy and intelligence. due in part to the dynamic nature of the machine learning algorithms used in data-driven analytics models, the configuration of a smart product is frequently refined, often in a real-time context. hence, a smart product requires a continuous evolution of its architec…	Li, Yp	Li, Yp;Modular Design Of Data-Driven Analytics Models In Smart-Product Development	301
2018	37	Product Innovation Design Based On Deep Learning And Kansei Engineering	Deep Learning;Kenpi;Kansei Engineering;Neural Style Transfer;Product Innovative Design	Form;System	Applied Sciences-Basel	Quan, Hf;Li, Sb;Hu, Jj	Guizhou Univ;Univ South Carolina	Usa;Peoples R China	Quan, Huafeng;Li, Shaobo;Hu, Jianjun	Chemistry, Multidisciplinary;Engineering, Multidisciplinary;Materials Science, Multidisciplinary;Physics, Applied	Chemistry;Engineering;Materials Science;Physics	13	208	39	208	32	DEC	National Natural Science Foundation Of China [51475097, 91746116, 51741101];Science And Technology Foundation Of Guizhou Province [[2015]4011, [2016]5013, [2015]02, [2017]239]	Li, Sb;Hu, Jj (Corresponding Author), Guizhou Univ, Sch Mech Engn, Guiyang 550025, Guizhou, Peoples R China;Hu, Jj (Corresponding Author), Univ South Carolina, Dept Comp Sci & Engn, Columbia, Sc 29208 Usa.			Wos:000455145000065	10.3390/App8122397	creative product design is becoming critical to the success of many enterprises. however, the conventional product innovation process is hindered by two major challenges: the difficulty to capture users' preferences and the lack of intuitive approaches to visually inspire the designer, which is especially true in fashion design and form design of many other types of products. in this paper, we pr…	Quan, Hf	Quan, Hf;Product Innovation Design Based On Deep Learning And Kansei Engineering	65
2018	5	Sketch-Based Shape Retrieval Via Multi-View Attention And Generalized Similarity	Sketch;Shape;Attention;Generalized Similarity	Model	2018 7Th International Conference On Digital Home (Icdh 2018)	Xu, Yz;Hu, Jc;Zeng, K;Gong, Yy	Sun Yat Sen Univ;Guangdong Univ Foreign Studies	Peoples R China	Xu, Yongzhe;Hu, Jiangchuan;Zeng, Kun;Gong, Yongyi	Computer Science, Interdisciplinary Applications	Computer Science	0	2	5	2	26	Missing Fields	National Science Foundation Grant Of China [61370160, U1711266];Guangdong Province Natural Science Foundation [2015A030313578, 2015A030313129]	Zeng, K (Corresponding Author), Sun Yat Sen Univ, Sch Data & Comp Sci, Guangzhou 510006, Guangdong, Peoples R China.			Wos:000462352800053	10.1109/Icdh.2018.00061	sketch-based shape retrieval has received increasing attention in computer vision and computer graphics. it suffers from the challenge gap between 2d sketches and 3d shapes. in this paper, we propose a generalized similarity matching framework based on a multi-view attention network (wan), which can retrieve 3d shape that is most similar to the query sketch. in proposed approach, firstly we compu…	Xu, Yz	Xu, Yz;Sketch-Based Shape Retrieval Via Multi-View Attention And Generalized Similarity	151
2018	71	Utilizing Text Mining And Kansei Engineering To Support Data-Driven Design Automation At Conceptual Design Stage	Text Mining;Data-Driven Design;Kansei Engineering;Product Development Process;Design Automation	Product;Identification;Technology;Form	Advanced Engineering Informatics	Chiu, Mc;Lin, Kz	Natl Tsing Hua Univ	Taiwan	Chiu, Ming-Chuan;Lin, Kong-Zhao	Computer Science, Artificial Intelligence;Engineering, Multidisciplinary	Computer Science;Engineering	9	137	84	137	44	OCT	Ministry Of Science And Technology Of The Republic Of China, Taiwan [Most 106-2221-E-007-073-My3];Advanced Manufacturing And Service Management Research Center (Amsmrc), National Tsing Hua University, Taiwan, Republic Of China	Chiu, Mc (Corresponding Author), 101,Sect 2,Kuang Fu Rd, Hsinchu 30013, Taiwan.			Wos:000454378700060	10.1016/J.Aei.2018.11.002	purpose: the purpose of this research was to develop a case-based method for analyzing online customer reviews and extracting customer preferences through an integration of text mining and kansei engineering (ke) in an effort to achieve conceptual data-driven design automation and to successfully identify future trends in a particular consumer product. design/methodology/approach this study's mod…	Chiu, Mc	Chiu, Mc;Utilizing Text Mining And Kansei Engineering To Support Data-Driven Design Automation At Conceptual Design Stage	292
2019	1	3D Shape Classification With Nnls Coding And Optimal Projections Technique	Sparse Representation;Nonnegative Least Squares;3D Shape Classification;Laplace-Beltrami;Support Vector Machines	Face	Multimedia Tools And Applications	Fotopoulou, F;Oikonomou, S;Economou, G	Univ Patras	Greece	Fotopoulou, F;Oikonomou, S;Economou, G	Computer Science, Information Systems;Computer Science, Software Engineering;Computer Science, Theory & Methods;Engineering, Electrical & Electronic	Computer Science;Engineering	0	6	1	6	49	DEC	Missing Fields	Fotopoulou, F (Corresponding Author), Univ Patras, Dept Comp Engn & Informat, Patras 26500, Greece.			Wos:000489940100001	10.1007/S11042-019-08152-5	using graph-based encoding techniques and well-known shape descriptors a framework is presented here which is checked for 3d shape classification performance. a data-driven feature extraction procedure, taking the form of a simple projection operator, is in the core of our framework. provided a shape database, a graph encapsulating the structural relationships among all the available shapes is fi…	Fotopoulou, F	Fotopoulou, F;3D Shape Classification With Nnls Coding And Optimal Projections Technique	33
2019	18	A Framework For The Capture And Analysis Of Product Usage Data For Continuous Product Improvement	Data-Driven Product Improvement;Requirements Engineering;Self-Optimizing Product;Product Embedded Information Devices (Peid);Internet Of Things (Iot);Machine Learning;Data Mining;Data-Driven Design;Closed-Loop Product Lifecycle Management;User-Centered Design	Internet;Design;Field	Journal Of Manufacturing Science And Engineering-Transactions Of The Asme	Voet, H;Altenhof, M;Ellerich, M;Schmitt, Rh;Linke, B	Univ Calif Davis;Rhein Westfal Th Aachen	Germany;Usa	Voet, Henning;Altenhof, Max;Ellerich, Max;Schmitt, Robert H;Linke, Barbara	Engineering, Manufacturing;Engineering, Mechanical	Engineering	2	43	18	43	45	FEB	Deutsche Forschungsgemeinschaft (Cluster Of Excellence "Integrative Production Technology For High-Wage Countries");Rwth Aachen University (Rwth Research Ambassador Scholarship)	Voet, H (Corresponding Author), Rhein Westfal Th Aachen, Lab Machine Tools & Prod Engn Wzl, Campus Blvd 30, D-52074 Aachen, Germany.			Wos:000455219600011	10.1115/1.4041948	product improvement, usually through changes in design and functionality, is relying more and more on the continuous analysis of large amounts of data. product data can come from many sources with varying effort in obtaining the data, e.g., condition monitoring and maintenance data. intelligent products, also known as "product embedded information devices" (peid), are already equipped with sensor…	Voet, H	Voet, H;A Framework For The Capture And Analysis Of Product Usage Data For Continuous Product Improvement	331
2019	15	A New User Implicit Requirements Process Method Oriented To Product Design	User Implicit Requirements;Cloud Service Platform;Product Attributes;Metaphor Extraction Technique;Semantic Similarity	Customer Requirements;Online Reviews;Knowledge	Journal Of Computing And Information Science In Engineering	Guo, Q;Xue, C;Yu, Mj;Shen, Zf	Southeast Univ;Northwestern Polytech Univ	Peoples R China	Guo, Qi;Xue, Chengqi;Yu, Mingjiu;Shen, Zhangfan	Computer Science, Interdisciplinary Applications;Engineering, Manufacturing	Computer Science;Engineering	4	103	16	103	56	MAR	National Natural Science Foundation Of China [71471037, 71271053];Science And Technology On Avionics Integration Laboratory And Aeronautical Science Fund [20165569019]	Xue, C (Corresponding Author), Southeast Univ, Sch Mech Engn, Nanjing 210000, Jiangsu, Peoples R China.			Wos:000457838500012	10.1115/1.4041418	user requirements play an important role in product design activities. customer satisfaction has a direct bearing on the acquisition of user requirements for product design. however, these implicit requirements are equipped with the attributes of potentiality, fuzziness, and subjectivity. in this paper, a new implicit user requirement processing method based on a cloud service platform is propose…	Guo, Q	Guo, Q;A New User Implicit Requirements Process Method Oriented To Product Design	120
2019	101	A Novel Data-Driven Graph-Based Requirement Elicitation Framework In The Smart Product-Service System Context	Requirement Elicitation;Product-Service Systems;Knowledge Management;Data-Driven Design;Value Co-Creation	Life-Cycle;Conceptual-Framework;Design;Extraction;Representation	Advanced Engineering Informatics	Wang, Zx;Chen, Ch;Zheng, P;Li, Xy;Khoo, Lp	Nanyang Technol Univ	Singapore	Wang, Zuoxu;Chen, Chun-Hsien;Zheng, Pai;Li, Xinyu;Khoo, Li Pheng	Computer Science, Artificial Intelligence;Engineering, Multidisciplinary	Computer Science;Engineering	11	137	103	137	59	OCT	National Research Foundation (Nrf) Singapore;Delta Electronics International (Singapore) Pte Ltd., Under The Corporate Laboratory@ University Scheme At Nanyang Technological University, Singapore [Sco-Rp1, Rca-16/434]	Zheng, P (Corresponding Author), Nanyang Technol Univ, Sch Mech & Aerosp Engn, Singapore 639798, Singapore;Zheng, P (Corresponding Author), Nanyang Technol Univ, Sch Elect & Elect Engn, Delta Ntu Corp Lab Cyber Phys Syst, Singapore 639798, Singapore.			Wos:000501389000015	10.1016/J.Aei.2019.100983	nowadays, industrial companies are facing ever-increasing challenges to generate new value-in-use and maintain their high competitiveness in the market. with the rapid development of information and communication technology (ict), it is embedded in the products themselves, i.e. smart, connected products (scps) to generate values. hence, an emerging value proposition paradigm, smart product-servic…	Wang, Zx	Wang, Zx;A Novel Data-Driven Graph-Based Requirement Elicitation Framework In The Smart Product-Service System Context	302
2019	234	Abc: A Big Cad Model Dataset For Geometric Deep Learning	Missing Fields	Robust Normal Estimation	2019 Ieee/Cvf Conference On Computer Vision And Pattern Recognition (Cvpr 2019)	Koch, S;Matveev, A;Jiang, Zs;Williams, F;Artemov, A;Burnaev, E;Alexa, M;Zorin, D;Panozzo, D	Nyu;Tu Berlin;Skoltech	Germany;Usa;Russia	Koch, Sebastian;Matveev, Albert;Jiang, Zhongshi;Williams, Francis;Artemov, Alexey;Burnaev, Evgeny;Alexa, Marc;Zorin, Denis;Panozzo, Daniele	Computer Science, Artificial Intelligence;Computer Science, Theory & Methods	Computer Science	2	28	252	28	53	Missing Fields	Onshape;Nyu It High Performance Computing Resources, Services, And Staff Expertise;Nsf [Mri-1229185, Iis-1320635, Dms1436591, 1835712];Nsf Career Award [1652515];Russian Science Foundation [19-41-04109];Russian Science Foundation [19-41-04109] Funding Source: Russian Science Foundation;Direct For Computer & Info Scie & Enginr;Office Of Advanced Cyberinfrastructure (Oac) [1835712] Funding Source: …	Koch, S (Corresponding Author), Tu Berlin, Berlin, Germany.			Wos:000542649303021	10.1109/Cvpr.2019.00983	we introduce abc-dataset, a collection of one million computer-aided design (cad) models for research of geometric deep learning methods and applications. each model is a collection of explicitly parametrized curves and surfaces, providing ground truth for differential quantities, patch segmentation, geometric feature detection, and shape reconstruction. sampling the parametric descriptions of su…	Koch, S	Koch, S;Abc: A Big Cad Model Dataset For Geometric Deep Learning	48
2019	14	Automatic Microarray Image Segmentation With Clustering-Based Algorithms	Missing Fields	Cdna Microarray;Spots;Model;Intensity	Plos One	Shao, Gf;Li, Dy;Zhang, Jf;Yang, Jb;Shangguan, Yl	Xiamen Univ	Peoples R China	Shao, Guifang;Li, Dongyao;Zhang, Junfa;Yang, Jianbo;Shangguan, Yali	Multidisciplinary Sciences	Science & Technology - Other Topics	0	12	16	12	43	JAN 22	National Natural Science Foundation Of China [61403318]	Shao, Gf (Corresponding Author), Xiamen Univ, Dept Automat, Xiamen, Peoples R China.			Wos:000456306400004	10.1371/Journal.Pone.0210075	image segmentation, as a key step of microarray image processing, is crucial for obtaining the spot expressions simultaneously. however, state-of-art clustering-based segmentation algorithms are sensitive to noises. to solve this problem and improve the segmentation accuracy, in this article, several improvements are introduced into the fast and simple clustering methods (k-means and fuzzy c mean…	Shao, Gf	Shao, Gf;Automatic Microarray Image Segmentation With Clustering-Based Algorithms	61
2019	14	Combining Users' Cognition Noise With Interactive Genetic Algorithms And Trapezoidal Fuzzy Numbers For Product Color Design	Missing Fields	Consumer-Oriented Technology;Image Evaluation;System;Support;Harmony;Model	Computational Intelligence And Neuroscience	Yang, Yp;Tian, X	Changan Univ	Peoples R China	Yang, Yan-Pu;Tian, Xing	Mathematical & Computational Biology;Neurosciences	Mathematical & Computational Biology;Neurosciences & Neurology	3	54	14	54	42	AUG 1	National Natural Science Foundation Of China [51805043];Innovative Talents Promotion Project Of Shannxi Province Of China [2019Kjxx-059];Fundamental Research Funds For The Central Universities, Chd [300102259202]	Yang, Yp (Corresponding Author), Changan Univ, Sch Construct Machinery, Xian 710064, Shaanxi, Peoples R China.			Wos:000481822700001	10.1155/2019/1019749	product color plays a vital role in shaping brand style and affecting users' purchase decision. however, users' preferences about product color design schemes may vary due to their cognition differences. although considering users' perception of product color has been widely performed by industrial designers, it is not effective to support this activity. in order to provide users with plentiful p…	Yang, Yp	Yang, Yp;Combining Users' Cognition Noise With Interactive Genetic Algorithms And Trapezoidal Fuzzy Numbers For Product Color Design	177
2019	2	Curved Surface Shape Generation Method Based On "Complexity" Index	Missing Fields	Missing Fields	2019 Ieee International Conference On Systems, Man And Cybernetics (Smc)	Okano, A;Matsumoto, T;Kato, T	Keio Univ	Japan	Okano, Akihiro;Matsumoto, Taishi;Kato, Takeo	Computer Science, Cybernetics;Computer Science, Information Systems	Computer Science	0	3	2	3	16	Missing Fields	Japan Society For The Promotion Of Science [18K18318];Research Grant Of Keio Leading-Edge Laboratory Of Science Technology;Grants-In-Aid For Scientific Research [18K18318] Funding Source: Kaken	Okano, A (Corresponding Author), Keio Univ, Yokohama, Kanagawa, Japan.			Wos:000521353901021	Missing Fields	in recent years, the shape of industrial products has become important. in the conventional study, total absolute curvature was proposed as an index of "complexity" on curved surface shapes. however, the proposed index has not been applied to the research aiming to support design activities. therefore, this research proposes a curved surface shape generation method based on the index. the method …	Okano, A	Okano, A;Curved Surface Shape Generation Method Based On "Complexity" Index	421
2019	3	Data As A Medium For Inheritance And Creativity Of Traditional Design. A Case Study On Data-Driven Modern Creative Design Of Ancient Chinese Catering Utensils	Traditional Design;Innovation;Data Analysis;Data Driven Design;Graphic Quantitation	Data Science;Big Data	Design Journal	Han, R;Zhang, H;Li, R;Sha, Cf	Jiangnan Univ;Jiangsu Univ	Peoples R China	Han, Rong;Zhang, Hong;Li, Rui;Sha, Chunfa	Art	Art	5	64	4	64	21	Missing Fields	Propagation Of Ancient Chinese Catering Utensils Cultures Under The Technology And Form Perspective Base By General Art Projects Of National Social Science Fund Of China [17Bg123]	Han, R (Corresponding Author), Jiangsu Univ, Sch Art, Zhenjiang, Jiangsu, Peoples R China.			Wos:000470072200075	10.1080/14606925.2019.1594978	traditional handicraft design, nowadays, is regarded as the inheritance of traditional design culture in modern times. however, due to the gaps between traditional design and modern design, the products of modern design are limited to the superficial cultural exhibition but lack practical cultural connotations. regarding the gaps under the design context in china, we proposed a strategy of data-d…	Han, R	Han, R;Data As A Medium For Inheritance And Creativity Of Traditional Design. A Case Study On Data-Driven Modern Creative Design Of Ancient Chinese Catering Utensils	283
2019	45	Data-Driven Design Space Exploration And Exploitation For Design For Additive Manufacturing	Missing Fields	Engineering Design;Flexibility Characteristics;3-Dimensional Kinematics;Human Ankle;Models	Journal Of Mechanical Design	Xiong, Y;Duong, Plt;Wang, D;Park, Si;Ge, Q;Raghavan, N;Rosen, Dw	Shanghai Jiao Tong Univ;Incheon Natl Univ;Georgia Inst Technol;Singapore Univ Technol & Design	Usa;South Korea;Peoples R China;Singapore	Xiong, Yi;Pham Luu Trung Duong;Wang, Dong;Park, Sang-In;Ge, Qi;Raghavan, Nagarajan;Rosen, David W	Engineering, Mechanical	Engineering	0	33	47	33	34	OCT	Singapore National Research Foundation [Rgdm1710205]	Xiong, Y (Corresponding Author), Singapore Univ Technol & Design, Digital Mfg & Design Ctr, Singapore 487372, Singapore.			Wos:000506890700002	10.1115/1.4043587	recently, design for additive manufacturing has been proposed to maximize product performance through the rational and integrated design of the product, its materials, and their manufacturing processes. searching design solutions in such a multidimensional design space is a challenging task. notably, no existing design support method is both rapid and tailored to the design process. in this study…	Xiong, Y	Xiong, Y;Data-Driven Design Space Exploration And Exploitation For Design For Additive Manufacturing	311
2019	0	Design Driven Test Patterns For Smo Opc And Spa	Lithography;Test Patterns;Smo;Opc	Missing Fields	2019 China Semiconductor Technology International Conference (Cstic)	Ma, L;Duan, Yl;Dong, Ls;Zhang, Lb;Wei, Yy	Univ Chinese Acad Sci;Gangzheng Intellectual Property Ctr Co Ltd;Chinese Acad Sci	Peoples R China	Ma, Le;Duan, Yingli;Dong, Lisong;Zhang, Libin;Wei, Yayi	Engineering, Electrical & Electronic;Materials Science, Multidisciplinary;Physics, Condensed Matter	Engineering;Materials Science;Physics	0	0	0	0	7	Missing Fields	Missing Fields	Wei, Yy (Corresponding Author), Chinese Acad Sci, Inst Microelect, Integrated Circuit Adv Proc Ctr, Beijing 100029, Peoples R China;Wei, Yy (Corresponding Author), Univ Chinese Acad Sci, Beijing 100029, Peoples R China.			Wos:000490874500078	10.1109/Cstic.2019.8755685	comprehensive test patterns are crucial to the development of new semiconductor technology. they play a key role in lithography such as source optimization, model calibration and mask optimization. this paper presents design driven test patterns generation principle and flow. the applications of test patterns on smo (source and mask optimization) opc (optical proximity correction) and spa (scatti…	Ma, L	Ma, L;Design Driven Test Patterns For Smo Opc And Spa	203
2019	550	Digital Twin-Driven Product Design Framework	Digital Twin;Product Design;Framework;Design Theory;Data Lifecycle;Big Data	Future;Systems	International Journal Of Production Research	Tao, F;Sui, Fy;Liu, A;Qi, Ql;Zhang, M;Song, By;Guo, Zr;Lu, Scy;Nee, Ayc	Univ Southern Calif;Natl Univ Singapore;Univ New South Wales;Beihang Univ	Australia;Usa;Peoples R China;Singapore	Tao, Fei;Sui, Fangyuan;Liu, Ang;Qi, Qinglin;Zhang, Meng;Song, Boyang;Guo, Zirong;Lu, Stephen C -Y;Nee, A Y C	Engineering, Industrial;Engineering, Manufacturing;Operations Research & Management Science	Engineering;Operations Research & Management Science	81	1105	617	1105	57	JUN 18	Beijing Nova Program [Z161100004916063];National Natural Science Foundation Of China (Nsfc) [51522501];National Key Research And Development Plan [2016Yfb1101700]	Tao, F (Corresponding Author), Beihang Univ, Sch Automat Sci & Elect Engn, Beijing, Peoples R China.			Wos:000474250800010	10.1080/00207543.2018.1443229	with the advent of new generation information technologies in industry and product design, the big data-driven product design era has arrived. however, the big data-driven product design mainly places emphasis on the analysis of physical data rather than the virtual models, in other words, the convergence between product physical and virtual space is usually absent. digital twin, a new emerging a…	Tao, F	Tao, F;Digital Twin-Driven Product Design Framework	335
2019	121	How Data Science Workers Work With Data: Discovery, Capture, Curation, Design, Creation	Data Science;Work-Practices;Data Discovery;Data Capture;Data Curation;Data Design;Data Creation;Grounded Theory	Big Data;Materiality	Chi 2019: Proceedings Of The 2019 Chi Conference On Human Factors In Computing Systems	Muller, M;Lange, I;Wang, D;Piorkowski, D;Tsay, J;Liao, Qv;Dugan, C;Erickson, T	Ibm Res	Usa	Muller, Michael;Lange, Ingrid;Wang, Dakuo;Piorkowski, David;Tsay, Jason;Liao, Q Vera;Dugan, Casey;Erickson, Thomas	Computer Science, Cybernetics;Computer Science, Information Systems;Computer Science, Theory & Methods	Computer Science	5	18	137	18	94	Missing Fields	Missing Fields	Muller, M (Corresponding Author), Ibm Res, Cambridge, Ma 02142 Usa.			Wos:000474467901055	10.1145/3290605.3300356	with the rise of big data, there has been an increasing need for practitioners in this space and an increasing opportunity for researchers to understand their workflows and design new tools to improve it. data science is often described as data-driven, comprising unambiguous data and proceeding through regularized steps of analysis. however, this view focuses more on abstract processes, pipelines…	Muller, M	Muller, M;How Data Science Workers Work With Data: Discovery, Capture, Curation, Design, Creation	40
2019	2	Image Generation In Product Form For Sustainable Development	Marketing Strategy;Mouse Design;Semantic Differential Method;Product Form;Hierarchy Process	Missing Fields	Journal Of Environmental Protection And Ecology	Lin, My;Qui, Gp;Chen, J;Li, Yg	Sanming Univ	Peoples R China	Lin, Ming-Chyuan;Qui, Guo-Peng;Chen, Jing;Li, Yi Gui	Environmental Sciences	Environmental Sciences & Ecology	0	12	2	12	12	Missing Fields	Fujian University Humanities And Social Science Research Base-Product Design Innovation Research Centre, China [Ja11262S]	Lin, My (Corresponding Author), Sanming Univ, Coll Arts & Design, Fujian, Peoples R China.			Wos:000531884000010	Missing Fields	product design is one of the core strategies for the sustainable development of a company in the global competitive markets. in product design, the designer develops an innovative form to attract the attention of consumers. the innovative form of a product refers to the acceptable degree of a favourable image that the consumer can respond to his or her buying. however, most designers design produ…	Lin, My	Lin, My;Image Generation In Product Form For Sustainable Development	230
2019	2	Methodical Data-Driven Integration Of Perceived Quality Into The Product Development Process	Perceived Quality;Product Development Process;Data Analytics;Customer Driven Innovation	Missing Fields	29Th Cirp Design Conference 2019	Lindemann, M;Nuy, L;Briele, K;Schmitt, R	Wzl Rwth Aachen Univ	Germany	Lindemann, Marie;Nuy, Leo;Briele, Kristof;Schmitt, Robert	Engineering, Industrial;Engineering, Manufacturing	Engineering	0	4	2	4	15	Missing Fields	German Research Foundation Dfg [390621612]	Lindemann, M (Corresponding Author), Wzl Rwth Aachen Univ, Lab Machine Tools & Prod Engn, Campus Blvd 30, D-52074 Aachen, Germany.			Wos:000566943700069	10.1016/J.Procir.2019.04.205	due to the strong technical and functional similarities of today's consumer products, the emotional and sensory product characteristics become increasingly important in order to stand out from the competition. to meet the comprehensive customer requirements it is no longer sufficient to develop a product that only focusses on functional aspects - the common understanding of product quality - but …	Lindemann, M	Lindemann, M;Methodical Data-Driven Integration Of Perceived Quality Into The Product Development Process	318
2019	14	Multi-View Feature Modeling For Design-For-Additive Manufacturing	Multi-View Feature Modeling;Level Set;Design-For-Additive Manufacturing;Integrated Product Development	Structural Topology Optimization;Integration;Concurrent;Cad;Generation;Trends;Shape	Advanced Engineering Informatics	Leili;Liu, Jk;Ma, Ys;Ahmad, R;Qureshi, A	Univ Alberta;Univ Pittsburgh	Usa;Canada	Leili;Liu, Jikai;Ma, Yongsheng;Ahmad, Rafiq;Qureshi, Ahmed	Computer Science, Artificial Intelligence;Engineering, Multidisciplinary	Computer Science;Engineering	0	28	15	28	59	JAN	Natural Sciences And Engineering Research Council Of Canada (Nserc) [Rgpin-2016-04689];University Of Alberta Mechanical Engineering Department	Liu, Jk (Corresponding Author), Univ Pittsburgh, Dept Mech Engn & Mat Sci, Pittsburgh, Pa 15260 Usa.			Wos:000461408100011	10.1016/J.Aei.2018.12.004	this paper presents a design-for-additive manufacturing (dfam) methodology based on multi-view feature modeling. multi-view feature model is a unified information carrier which contains the data of a product related to different lifecycle stages. the information can be selectively extracted, interpreted and clustered to provide a specific view of the product and thus to facilitate the design-for-…	Leili	Leili;Multi-View Feature Modeling For Design-For-Additive Manufacturing	444
2019	0	Ostnet: Calibration Method For Optical See-Through Head-Mounted Displays Via Non-Parametric Distortion Map Generation	Computing Methodologies;Computer Graphics;Graphics Systems And Interfaces;Mixed / Augmented Reality;Computing Methodologies;Computer Graphics;Graphics Systems And Interfaces;Virtual Reality	Spatial Calibration	Adjunct Proceedings Of The 2019 Ieee International Symposium On Mixed And Augmented Reality (Ismar-Adjunct 2019)	Someya, K;Hiroi, Y;Yamada, M;Itoh, Y	Tokyo Inst Technol;Kyoto Univ;Keio Univ	Japan	Someya, Kiyosato;Hiroi, Yuichi;Yamada, Makoto;Itoh, Yuta	Computer Science, Hardware & Architecture;Robotics;Imaging Science & Photographic Technology	Computer Science;Robotics;Imaging Science & Photographic Technology	0	0	1	0	8	Missing Fields	Jsps Kakenhi, Japan [Jp17H04692];Jst Presto, Japan [Jp-Mjpr17J2]	Someya, K (Corresponding Author), Tokyo Inst Technol, Tokyo, Japan.			Wos:000530071200061	10.1109/Ismar-Adjunct.2019.00-34	we propose a spatial calibration method for optical see-through head-mounted displays (ost-hmds) having complex optical distortion such as wide field-of-view (fov) designs. viewpoint-dependent non-linear optical distortion makes existing spatial calibration methods either impossible to handle or difficult to compensate without intensive computation. to overcome this issue, we propose ostnet, a no…	Someya, K	Someya, K;Ostnet: Calibration Method For Optical See-Through Head-Mounted Displays Via Non-Parametric Distortion Map Generation	145
2019	17	Quantification Of "Complexity" In Curved Surface Shape Using Total Absolute Curvature	Surface Design;Shape Complexity;Gaussian Curvature	Missing Fields	Computers & Graphics-Uk	Matsumoto, T;Sato, K;Matsuoka, Y;Kato, T	Chiba Univ;Keio Univ	Japan	Matsumoto, Taishi;Sato, Koichiro;Matsuoka, Yoshiyuki;Kato, Takeo	Computer Science, Software Engineering	Computer Science	0	15	17	15	31	FEB	Missing Fields	Kato, T (Corresponding Author), Keio Univ, Kohoku Ku, 3-14-1 Hiyoshi, Yokohama, Kanagawa, Japan.			Wos:000458709700013	10.1016/J.Cag.2018.10.009	in recent years, with the popularization of 3d-cad, various curved surface shapes have been used in the styling of industrial products. however, evaluation and control of shape features are done in trial and error based on the experience and intuition of the designer, causing the inefficiency of styling design. therefore, this study aims to support the styling design by quantifying cognitive char…	Matsumoto, T	Matsumoto, T;Quantification Of "Complexity" In Curved Surface Shape Using Total Absolute Curvature	175
2019	63	Sample-Based Monte Carlo Denoising Using A Kernel-Splatting Network	Monte Carlo Denoising;Deep Learning;Data-Driven Methods;Convolutional Neural Networks	Missing Fields	Acm Transactions On Graphics	Gharbi, M;Li, Tm;Aittala, M;Lehtinen, J;Durand, F	Mit Csail;Aalto Univ;Adobe;Nvidia	Usa;Finland	Gharbi, Michatel;Li, Tzu-Mao;Aittala, Miika;Lehtinen, Jaakko;Durand, Fredo	Computer Science, Software Engineering	Computer Science	0	14	73	14	53	JUL	Toyota Research Institute	Gharbi, M (Corresponding Author), Adobe, San Jose, Ca 95110 Usa;Gharbi, M (Corresponding Author), Mit Csail, Cambridge, Ma 02139 Usa.			Wos:000475740600099	10.1145/3306346.3322954	denoising has proven to be useful to efficiently generate high-quality monte carlo renderings. traditional pixel-based denoisers exploit summary statistics of a pixel's sample distributions, which discards much of the samples' information and limits their denoising power. on the other hand, sample-based techniques tend to be slow and have difficulties handling general transport scenarios. we pres…	Gharbi, M	Gharbi, M;Sample-Based Monte Carlo Denoising Using A Kernel-Splatting Network	142
2019	110	Scan2Cad: Learning Cad Model Alignment In Rgb-D Scans	Missing Fields	Missing Fields	2019 Ieee/Cvf Conference On Computer Vision And Pattern Recognition (Cvpr 2019)	Avetisyan, A;Dahnert, M;Dai, A;Savva, M;Chang, Ax;Niessner, M	Tech Univ Munich;Simon Fraser Univ	Germany;Canada	Avetisyan, Armen;Dahnert, Manuel;Dai, Angela;Savva, Manolis;Chang, Angel X;Niessner, Matthias	Computer Science, Artificial Intelligence;Computer Science, Theory & Methods	Computer Science	4	9	125	9	43	Missing Fields	Occipital;Erc [804724];Google Faculty Award;Zd.B;Tum-Ias;German Excellence Initiative;European Union [291763]	Avetisyan, A (Corresponding Author), Tech Univ Munich, Munich, Germany.			Wos:000529484002079	10.1109/Cvpr.2019.00272	we present scan2cad, a novel data-driven method that learns to align clean 3d cad models from a shape database to the noisy and incomplete geometry of a commodity rgb-d scan. for a 3d reconstruction of an indoor scene, our method takes as input a set of cad models, and predicts a 9dof pose that aligns each model to the underlying scan geometry. to tackle this problem, we create a new scan-to-cad …	Avetisyan, A	Avetisyan, A;Scan2Cad: Learning Cad Model Alignment In Rgb-D Scans	62
2019	29	Shifting Value Stream Patterns Along The Product Lifecycle With Digital Twins	Digital Twin;Cyber-Physical Systems;Design;Manufacturing;Recycling	Future;Design;Generation;Quality;Uncertainty;Information;Management;Systems	7Th Cirp Global Web Conference - Towards Shifted Production Value Stream Patterns Through Inference Of Data, Models, And Technology (Cirpe 2019)	Schleich, B;Dittrich, Ma;Clausmeyer, T;Damgrave, R;Erkoyuncu, Ja;Haefner, B;De Lange, J;Plakhotnik, D;Scheidel, W;Wuest, T	West Virginia Univ;Cranfield Univ;Tu Dortmund;Moduleworks Gmbh;Leibniz Univ Hannover;Friedrich Alexander Univ Erlangen Nurnberg;Univ Twente;Karlsruhe Inst Technol Kit	Germany;England;Usa;Netherlands	Schleich, Benjamin;Dittrich, Marc-Andre;Clausmeyer, Till;Damgrave, Roy;Erkoyuncu, John Ahmet;Haefner, Benjamin;De Lange, Jos;Plakhotnik, Denys;Scheidel, Wieben;Wuest, Thorsten	Engineering, Industrial	Engineering	4	32	33	32	58	Missing Fields	Cirp Community	Schleich, B (Corresponding Author), Friedrich Alexander Univ Erlangen Nurnberg, Engn Design, Martensstr 9, D-91058 Erlangen, Germany.			Wos:000567716000001	10.1016/J.Procir.2020.01.049	the concept of digital twins promises high potentials for product design, manufacturing, user experience and recycling. thus, digital twins have received increasing interest in academia and industry. however, the actual benefits of digital twins remain in many cases unclear. this article aims to summarize selected recent developments in this field and demonstrate use cases from different phases o…	Schleich, B	Schleich, B;Shifting Value Stream Patterns Along The Product Lifecycle With Digital Twins	217
2019	2	Significance And Challenges Of Data-Driven Product Generation And Retrofit Planning	Data-Driven Product Planning;Industrial Data Analytics;Lifecycle Analytics;Generation And Retrofit Planning	Life-Cycle;Analytics;Smart	29Th Cirp Design Conference 2019	Massmann, M;Meyer, M;Dumitrescu, R;Von Enzberg, S;Frank, M;Koldewey, C;Kühn, A;Reinhold, J	Fraunhofer Iem;Univ Paderborn	Germany	Massmann, Melina;Meyer, Maurice;Dumitrescu, Roman;Von Enzberg, Sebastian;Frank, Maximilian;Koldewey, Christian;Kuehn, Arno;Reinhold, Jannik	Engineering, Industrial;Engineering, Manufacturing	Engineering	0	6	2	6	21	Missing Fields	Federal Ministry Of Education And Research (Bundesministerium Fiir Bildung Und Forschung) - European Regional Development Fund	Massmann, M (Corresponding Author), Univ Paderborn, Heinz Nixdorf Inst, Chair Adv Syst Engn, Furstenallee 11, D-33102 Paderborn, Germany.			Wos:000566943700161	10.1016/J.Procir.2019.04.226	one of the notable drivers of the fourth industrial revolution is the collection of vast amounts of data along the entire lifecycle of a product. the analysis of product lifecycle data in conjunction with product hypotheses leads to promising potentials in strategic product planning. in this thesis paper, we postulate the need for data-driven product generation and retrofit planning as an interdi…	Massmann, M	Massmann, M;Significance And Challenges Of Data-Driven Product Generation And Retrofit Planning	0
2019	13	Towards An Integrated Process Model For New Product Development With Data-Driven Features (Npd<Sup>3</Sup>)	Smart Product Development;Concept Development;Npd;Kddm;Data-Driven Product Design;Uas Development	Stage;Agile;Design;Perspective;Systems	Research In Engineering Design	Li, Yp;Roy, U;Saltz, Js	Syracuse Univ	Usa	Li, Yunpeng;Roy, Utpal;Saltz, Jeffrey S	Engineering, Multidisciplinary;Engineering, Industrial;Engineering, Manufacturing	Engineering	3	40	17	40	51	APR	Center For Advanced Systems And Engineering (Case) At Syracuse University;U.S. National Institute Of Standards And Technology (Nist)	Li, Yp (Corresponding Author), Syracuse Univ, Dept Mech & Aerosp Engn, Syracuse, Ny 13244 Usa.			Wos:000463628100007	10.1007/S00163-019-00308-6	new information and communication technologies are changing the way products are developed, manufactured, serviced and managed over the product's lifecycle. today's smart products not only consist of their physical components, but are also endowed with intelligence. data and the capabilities to process data into knowledge and eventually decisions have become critical components of the product its…	Li, Yp	Li, Yp;Towards An Integrated Process Model For New Product Development With Data-Driven Features (Npd<Sup>3</Sup>)	297
2020	2	3D Conceptual Design Using Deep Learning	Design Support;Data Analysis;3D Representation;Generative Model;Computer Vision	Missing Fields	Advances In Computer Vision, Cvc, Vol 1	Yang, Zsh;Jiang, Hl;Zou, L	Carnegie Mellon Univ	Usa	Yang, Zhangsihao;Jiang, Haoliang;Zou, Lan	Computer Science, Artificial Intelligence;Computer Science, Theory & Methods;Engineering, Electrical & Electronic	Computer Science;Engineering	0	12	2	12	11	Missing Fields	Missing Fields	Zou, L (Corresponding Author), Carnegie Mellon Univ, Pittsburgh, Pa 15213 Usa.			Wos:000490725100002	10.1007/978-3-030-17795-9_2	this article proposes a data-driven methodology to achieve fast design support to generate or develop novel designs covering multiple object categories. this methodology implements two state-of-the-art variational autoencoder, dealing with 3d model data, with a self-defined loss function. the loss function, containing the outputs of individual layers in the autoencoder, obtains combinations of di…	Yang, Zsh	Yang, Zsh;3D Conceptual Design Using Deep Learning	44
2020	0	3D Shape Synthesis For Conceptual Design And Optimization Using Variational Autoencoders	Missing Fields	Reduction	Proceedings Of The Asme International Design Engineering Technical Conferences And Computers And Information In Engineering Conference, 2019, Vol 2A	Zhang, Wt;Yang, Zs;Jiang, Hl;Nigam, S;Yamakawa, S;Furuhata, T;Shimada, K;Kara, Lb	Carnegie Mellon Univ	Usa	Zhang, Wentai;Yang, Zhangsihao;Jiang, Haoliang;Nigam, Suyash;Yamakawa, Soji;Furuhata, Tomotake;Shimada, Kenji;Kara, Levent Burak	Engineering, Industrial;Engineering, Manufacturing;Engineering, Mechanical	Engineering	0	3	0	3	36	Missing Fields	Missing Fields	Kara, Lb (Corresponding Author), Carnegie Mellon Univ, Pittsburgh, Pa 15213 Usa.			Wos:000518726800017	Missing Fields	we propose a data-driven 3d shape design method that can learn a generative model from a corpus of existing designs, and use this model to produce a wide range of new designs. the approach learns an encoding of the samples in the training corpus using an unsupervised variational autoencoder-decoder architecture, without the need for an explicit parametric representation of the original designs. t…	Zhang, Wt	Zhang, Wt;3D Shape Synthesis For Conceptual Design And Optimization Using Variational Autoencoders	29
2020	23	A Data-Driven Based Decomposition-Integration Method For Remanufacturing Cost Prediction Of End-Of-Life Products	Remanufacturing Cost Prediction;Data-Driven;Decomposition-Integration Method;End-Of-Life Products	Crude-Oil Price;Time-Series;Design;Options;Model	Robotics And Computer-Integrated Manufacturing	Jiang, Zg;Ding, Zy;Liu, Y;Wang, Y;Hu, Xl;Yang, Yh	Sevalo Construct Machinery Remfg Co Ltd;Shanghai Dianji Univ;Cardiff Univ;Univ Brighton;Wuhan Univ Sci & Technol	Wales;England;Peoples R China	Jiang, Zhigang;Ding, Zhouyang;Liu, Ying;Wang, Yan;Hu, Xiaoli;Yang, Yihua	Computer Science, Interdisciplinary Applications;Engineering, Manufacturing;Robotics	Computer Science;Engineering;Robotics	4	57	23	57	35	FEB	National Natural Science Foundation Of China [51675388];Plateau Disciplines In Shanghai;Ministry Of Information Industry;College Students Science And Technology Innovation Fund Of Wuhan University Of Science And Technology [18Zrb074];Wuhan University Of Science And Technology Graduate Innovation And Entrepreneurship Fund [Jcx201866]	Jiang, Zg (Corresponding Author), Wuhan Univ Sci & Technol, Hubei Key Lab Mech Transmiss & Mfg Engn, Wuhan 430081, Hubei, Peoples R China.			Wos:000496834800006	10.1016/J.Rcim.2019.101838	remanufacturing cost prediction is conducive to visually judging the remanufacturability of end-of-life (eol) products from economic perspective. however, due to the randomness, non-linearity of remanufacturing cost and the lack of sufficient data samples. the general method for predicting the remanufacturing cost of eol products is very low precision. to this end, a data-driven based decompositi…	Jiang, Zg	Jiang, Zg;A Data-Driven Based Decomposition-Integration Method For Remanufacturing Cost Prediction Of End-Of-Life Products	282
2020	94	A Data-Driven Cyber-Physical Approach For Personalised Smart, Connected Product Co-Development In A Cloud-Based Environment	Data-Driven Design;Open Architecture Product;Smart Product;Cyber Physical System;Cloud;Mass Personalisation	Platform Design;Configuration;Toolkits;Customization;Framework;System	Journal Of Intelligent Manufacturing	Zheng, P;Xu, X;Chen, Ch	Nanyang Technol Univ;Univ Auckland	New Zealand;Singapore	Zheng, Pai;Xu, Xun;Chen, Chun-Hsien	Computer Science, Artificial Intelligence;Engineering, Manufacturing	Computer Science;Engineering	8	142	97	142	49	JAN	Missing Fields	Zheng, P (Corresponding Author), Nanyang Technol Univ, Sch Elect & Elect Engn, Delta Ntu Corp Lab Cyber Phys Syst, Singapore 639798, Singapore;Zheng, P (Corresponding Author), Univ Auckland, Dept Mech Engn, Private Bag 92019, Auckland, New Zealand;Zheng, P (Corresponding Author), Nanyang Technol Univ, Sch Mech & Aerosp Engn, Singapore 639798, Singapore.			Wos:000512004500002	10.1007/S10845-018-1430-Y	the rapid development of information and communication technology enables a promising market of information densely product, i.e. smart, connected product (scp), and also changes the way of user-designer interaction in the product development process. for scp, massive data generated by users drives its design innovation and somehow determines its final success. nevertheless, most existing works o…	Zheng, P	Zheng, P;A Data-Driven Cyber-Physical Approach For Personalised Smart, Connected Product Co-Development In A Cloud-Based Environment	286
2020	0	A Deep Residual Network For Geometric Decontouring	Missing Fields	Cloud Normal Estimation;False Contour;Image	Computer Graphics Forum	Ji, Zp;Zhou, Cq;Zhang, Qk;Zhang, Yw;Wang, Wp	Univ Hong Kong;Qilu Univ Technol;Hangzhou Dianzi Univ	Peoples R China	Ji, Zhongping;Zhou, Chengqin;Zhang, Qiankan;Zhang, Yu-Wei;Wang, Wenping	Computer Science, Software Engineering	Computer Science	0	7	0	7	43	OCT	National Natural Science Foundation Of China [61572161, 61772293];Zhejiang Provincial Science And Technology Program In China [2018C01030]	Ji, Zp (Corresponding Author), Hangzhou Dianzi Univ, Inst Graph & Image, Hangzhou, Peoples R China.			Wos:000594502700004	10.1111/Cgf.14124	grayscale images are intensively used to construct or represent geometric details in field of computer graphics. in practice, displacement mapping technique often allows an 8-bit grayscale image input to manipulate the position of vertices. human eyes are insensitive to the change of intensity between consecutive gray levels, so a grayscale image only provides 256 levels of luminances. however, w…	Ji, Zp	Ji, Zp;A Deep Residual Network For Geometric Decontouring	150
2020	86	A Knowledge Graph-Aided Concept-Knowledge Approach For Evolutionary Smart Product-Service System Development	Knowledge Graph;Concept-Knowledge Model;Smart Product-Service System;Knowledge Evolution;Conceptual Design;Creativity And Concept Generation	Design Approach;Data Analytics;Innovation;Framework;Management;Firms	Journal Of Mechanical Design	Li, Xy;Chen, Ch;Zheng, P;Wang, Zx;Jiang, Zh;Jiang, Zx	Shanghai Jiao Tong Univ;Nanyang Technol Univ;Hong Kong Polytech Univ;Fudan Univ	Singapore;Peoples R China	Li, Xinyu;Chen, Chun-Hsien;Zheng, Pai;Wang, Zuoxu;Jiang, Zuhua;Jiang, Zhixing	Engineering, Mechanical	Engineering	23	209	91	209	71	OCT 1	Delta Electronics Inc;National Research Foundation (Nrf) Singapore Under The Corporate Laboratory @ University Scheme At Nanyang Technological University, Singapore [Rca-16/434, Sco-Rp1];National Natural Science Foundation Of China [71671113]	Li, Xy (Corresponding Author), Nanyang Technol Univ, Delta Ntu Corp Lab Cyber Phys Syst, Sch Elect & Engn, Singapore 639798, Singapore;Li, Xy (Corresponding Author), Nanyang Technol Univ, Sch Mech & Aerosp Engn, Singapore 639798, Singapore;Li, Xy (Corresponding Author), Shanghai Jiao Tong Univ, Dept Ind Engn & Management, Shanghai 200240, Peoples R China.			Wos:000568802200004	10.1115/1.4046807	in order to meet user expectations and to optimize user experience with a higher degree of flexibility and sustainability, the smart product-service system (smart pss), as a novel value proposition paradigm considering both online and offline smartness, was proposed. however, conventional manners for developing pss require many professional consultations and still cannot meet with the new feature…	Li, Xy	Li, Xy;A Knowledge Graph-Aided Concept-Knowledge Approach For Evolutionary Smart Product-Service System Development	243
2020	6	A Simulation Data-Driven Design Approach For Rapid Product Optimization	Simulation Data-Driven Design;Dynamic Simulation Data Mining;Design Optimization;Wadaptiveos-Elm;Incremental Learning;Awcpso;Computer Aided Design;Data-Driven Engineering;Machine Learning For Engineering Applications	Sequential Learning Algorithm;Parameter Optimization;Online;Approximation;Ensemble;Machine;Support	Journal Of Computing And Information Science In Engineering	Shao, Yl;Zhu, Hw;Wang, R;Liu, Y;Liu, Ys	Cardiff Univ;Hangzhou Dianzi Univ;Zhejiang Univ;Ningbo Univ;Zhejiang Univ City Coll	Wales;Peoples R China	Shao, Yanli;Zhu, Huawei;Wang, Rui;Liu, Ying;Liu, Yusheng	Computer Science, Interdisciplinary Applications;Engineering, Manufacturing	Computer Science;Engineering	0	27	6	27	40	APR	National Key Technology Rd Program [2018Yfb1700901];National Science Foundation Of China [61702517, 61772525, 61873236, 61802211, 61902345]	Liu, Ys (Corresponding Author), Zhejiang Univ, State Key Lab Cad&Cg, Hangzhou 310027, Peoples R China.			Wos:000525411100009	10.1115/1.4045527	traditional design optimization is an iterative process of design, simulation, and redesign, which requires extensive calculations and analysis. the designer needs to adjust and evaluate the design parameters manually and continually based on the simulation results until a satisfactory design is obtained. however, the expensive computational costs and large resource consumption of complex product…	Shao, Yl	Shao, Yl;A Simulation Data-Driven Design Approach For Rapid Product Optimization	270
2020	3	Application Of The Fuzzy System For An Emotional Pattern Generator	Aesthetics;Behavioral Design;Human Factors;Interdisciplinary;Product Design;User Experience;Fuzzy Logic	Product Appearance;Design;Perception	Applied Sciences-Basel	Trautmann, L;Piros, A;Botzheim, J	Budapest Univ Technol & Econ	Hungary	Trautmann, Laura;Piros, Attila;Botzheim, Janos	Chemistry, Multidisciplinary;Engineering, Multidisciplinary;Materials Science, Multidisciplinary;Physics, Applied	Chemistry;Engineering;Materials Science;Physics	2	13	3	13	47	OCT	National Research, Development And Innovation Fund [2020-4.1.1, Tkp2020];Thematic Excellence Program	Trautmann, L (Corresponding Author), Budapest Univ Technol & Econ, Fac Mech Engn, Dept Machine & Prod Design, Muegyet Rkp 3, H-1111 Budapest, Hungary.			Wos:000586611700001	10.3390/App10196930	nowadays, the end-user's emotional engagement on commercial products has become more and more highlighted. product developers' and designers' jobs are beyond the aesthetic face to new requirements that improve the user experience. one of the most important user demands is customization. based on the new manufacturing technologies, there are some new opportunities to customize mass production outp…	Trautmann, L	Trautmann, L;Application Of The Fuzzy System For An Emotional Pattern Generator	213
2020	35	Ccmi : Classifier Based Conditional Mutual Information Estimation	Missing Fields	Networks	35Th Uncertainty In Artificial Intelligence Conference (Uai 2019)	Mukherjee, S;Asnani, H;Kannan, S	Univ Washington	Usa	Mukherjee, Sudipto;Asnani, Himanshu;Kannan, Sreeram	Computer Science, Artificial Intelligence;Computer Science, Theory & Methods;Mathematics, Applied;Statistics & Probability	Computer Science;Mathematics	0	2	36	2	50	Missing Fields	Nsf [1651236, 1703403];Nih [1R01Hg008164];Division Of Computing And Communication Foundations;Direct For Computer & Info Scie & Enginr [1651236, 1703403] Funding Source: National Science Foundation	Mukherjee, S (Corresponding Author), Univ Washington, Elect & Comp Engn, Seattle, Wa 98195 Usa.			Wos:000722423500100	Missing Fields	conditional mutual information (cmi) is a measure of conditional dependence between random variables x and y, given another random variable z. it can be used to quantify conditional dependence among variables in many data-driven inference problems such as graphical models, causal learning, feature selection and time-series analysis. while k-nearest neighbor (inn) based estimators as well as kerne…	Mukherjee, S	Mukherjee, S;Ccmi : Classifier Based Conditional Mutual Information Estimation	376
2020	12	Compact And Intuitive Data-Driven Brdf Models	Reflectance Modeling;Rendering;Computer Graphics	Representation;Reflectance	Visual Computer	Tongbuasirilai, T;Unger, J;Kronander, J;Kurt, M	Ege Univ;Linkoping Univ	Turkey;Sweden	Tongbuasirilai, Tanaboon;Unger, Jonas;Kronander, Joel;Kurt, Murat	Computer Science, Software Engineering	Computer Science	0	5	14	5	47	APR	Swedish Science Council [Vr-2015-05180];Strategic Research Environment Elliit;Scientific And Technical Research Council Of Turkey [115E203];Scientific Research Projects Directorate Of Ege University [2015/Bl/043];Swedish Research Council [2015-05180] Funding Source: Swedish Research Council	Tongbuasirilai, T (Corresponding Author), Linkoping Univ, Linkoping, Sweden.			Wos:000520835800015	10.1007/S00371-019-01664-Z	measured materials are rapidly becoming a core component in the photo-realistic image synthesis pipeline. the reason is that data-driven models can easily capture the underlying, fine details that represent the visual appearance of materials, which can be difficult or even impossible to model by hand. there are, however, a number of key challenges that need to be solved in order to enable efficie…	Tongbuasirilai, T	Tongbuasirilai, T;Compact And Intuitive Data-Driven Brdf Models	385
2020	74	Data-Driven Product Design Toward Intelligent Manufacturing: A Review	Data-Driven Design;Requirement Analysis;Conceptual Design;Data Modeling;Detailed Design;Knowledge Base	Quality Function Deployment;Decision-Making Approach;Case-Based System;Big Data;Engineering Design;Requirements Management;Knowledge Management;Conceptual Design;Genetic Algorithm;Representation	International Journal Of Advanced Robotic Systems	Feng, Yx;Zhao, Yl;Zheng, H;Li, Zw;Tan, Jr	Macau Univ Sci & Technol;Xidian Univ;Zhejiang Univ;Beihang Univ	Peoples R China	Feng, Yixiong;Zhao, Yuliang;Zheng, Hao;Li, Zhiwu;Tan, Jianrong	Robotics	Robotics	25	231	78	231	129	MAR	National Natural Science Foundation Of China [51675477, 51805472, 51775489];Zhejiang Provincial Natural Science Foundation Of China [Lz18E050001];Innovation Foundation Of The State Key Laboratory Of Fluid Power And Mechatronic Systems	Zheng, H (Corresponding Author), Beihang Univ, Hangzhou Innovat Inst, Hangzhou 310052, Peoples R China.			Wos:000524373900001	10.1177/1729881420911257	with the arrival of the big data era, a lot of valuable data have been generated in the entire product life cycle. the gathered product data contain a lot of design knowledge, which brings new opportunities to enhance the production efficiency and product competitiveness. data-driven product design is an effective and popular design method, which can provide sufficient support for designers to ma…	Feng, Yx	Feng, Yx;Data-Driven Product Design Toward Intelligent Manufacturing: A Review	280
2020	43	Data-Driven Structural Design Optimization For Petal-Shaped Auxetics Using Isogeometric Analysis	Data-Driven;Bp Neural Network;Petal-Shaped Auxetics;Negative Poisson'S Ratio;Structural Design;Isogeometric Analysis	Deep Material Network;Topology Optimization;Poissons-Ratio;Computational Homogenization;Composite Structures;Neural Networks;3D Elasticity;Backpropagation;Architectures;Model	Cmes-Computer Modeling In Engineering & Sciences	Wang, Yj;Liao, Zy;Shi, Sy;Wang, Zp;Poh, Lh	Astar;Natl Univ Singapore;South China Univ Technol	Peoples R China;Singapore	Wang, Yingjun;Liao, Zhongyuan;Shi, Shengyu;Wang, Zhenpei;Poh, Leong Hien	Engineering, Multidisciplinary;Mathematics, Interdisciplinary Applications	Engineering;Mathematics	2	40	44	40	77	Missing Fields	National Natural Science Foundation Of China [51705158, 51805174];Fundamental Research Funds For The Central Universities [2018Ms45, 2019Ms059]	Shi, Sy (Corresponding Author), South China Univ Technol, Guangdong Prov Key Lab Tech & Equipment Macromol, Minist Educ, Key Lab Polymer Proc Engn,Natl Engn Res Ctr Novel, Guangzhou 510641, Guangdong, Peoples R China;Wang, Zp (Corresponding Author), Astar, Ihpc, 1 Fusionopolis Way, Singapore 138632, Singapore.			Wos:000513774700002	10.32604/Cmes.2020.08680	focusing on the structural optimization of auxetic materials using data-driven methods, a back-propagation neural network (bpnn) based design framework is developed for petal-shaped auxetics using isogeometric analysis. adopting a nurbs-based parametric modelling scheme with a small number of design variables, the highly nonlinear relation between the input geometry variables and the effective ma…	Wang, Yj	Wang, Yj;Data-Driven Structural Design Optimization For Petal-Shaped Auxetics Using Isogeometric Analysis	2
2020	43	Data-Informed Inverse Design By Product Usage Information: A Review, Framework And Outlook	Inverse Design;Product Usage Information;Data-Informed Design;Data Analytics;Cyber-Physical Systems	Cloud-Based Design;Neural-Network;Hydrodynamic-Design;Genetic Algorithm;Fault-Detection;Optimization;Models;Experience;System;Turbomachinery	Journal Of Intelligent Manufacturing	Hou, L;Jiao, Rj	Xiamen Univ;Georgia Inst Technol	Usa;Peoples R China	Hou, Liang;Jiao, Roger J	Computer Science, Artificial Intelligence;Engineering, Manufacturing	Computer Science;Engineering	11	99	50	99	217	MAR	Missing Fields	Jiao, Rj (Corresponding Author), Georgia Inst Technol, Sch Mech Engn, Atlanta, Ga 30332 Usa.			Wos:000519408500001	10.1007/S10845-019-01463-2	a significant body of knowledge exists on inverse problems and extensive research has been conducted on data-driven design in the past decade. this paper provides a comprehensive review of the state-of-the-art methods and practice reported in the literature dealing with many different aspects of data-informed inverse design. by reviewing the origins and common practice of inverse problems in engi…	Hou, L	Hou, L;Data-Informed Inverse Design By Product Usage Information: A Review, Framework And Outlook	346
2020	1	Deepknit: Learning-Based Generation Of Machine Knitting Code	Machine Knitting;Code Generation;Deep Learning;Textile Manufacturing;Artificial Intelligence	Missing Fields	30Th International Conference On Flexible Automation And Intelligent Manufacturing (Faim2021)	Scheidt, F;Ou, Jf;Ishii, H;Meisen, T	Univ Wuppertal;Mit;Hotsprings Gmbh	Germany;Usa	Scheidt, Fabian;Ou, Jifei;Ishii, Hiroshi;Meisen, Tobias	Computer Science, Artificial Intelligence;Engineering, Manufacturing	Computer Science;Engineering	0	0	1	0	25	Missing Fields	Missing Fields	Scheidt, F (Corresponding Author), Univ Wuppertal, Inst Technol & Management Digital Transformat, Wuppertal, Germany;Scheidt, F (Corresponding Author), Hotsprings Gmbh, Aachen, Germany.			Wos:000863680700067	10.1016/J.Promfg.2020.10.068	modern knitting machines allow the manufacturing of various textile products with complex surface structures and patterns. however, programming these machines requires expert knowledge due to constraints of the process and the programming language. we present a long short-term memory (lstm) based deep learning model that generates low-level code of novel knitting patterns based on high-level styl…	Scheidt, F	Scheidt, F;Deepknit: Learning-Based Generation Of Machine Knitting Code	190
2020	3	Flexible Mesh Morphing In Sustainable Design Using Data Mining And Mesh Subdivision	Morphing;Triangle Mesh;Data Mining;Mesh Subdivision	Path Generation	Future Generation Computer Systems-The International Journal Of Escience	Gao, Yc;Zhang, Zx;Feng, Yx;Savchenko, M;Hagiwara, I;Zheng, H	Zhejiang Univ;Meiji Univ;Tokyo Inst Technol	Peoples R China;Japan	Gao, Yicong;Zhang, Zixian;Feng, Yixiong;Savchenko, Maria;Hagiwara, Ichiro;Zheng, Hao	Computer Science, Theory & Methods	Computer Science	2	19	3	19	25	JUL	National Natural Science Foundation Of China [51675477, 51775489];Zhejiang Provincial Natural Science Foundation Of China [Lz18E050001];National Key Research And Development Program Of China [2017Yfb1301200];Hagiwara Laboratory Of Tokyo Institute Of Technology	Feng, Yx (Corresponding Author), Zhejiang Univ, State Key Lab Fluid Power & Mechatron Syst, Hangzhou 310027, Peoples R China.			Wos:000528199900073	10.1016/J.Future.2017.11.031	as a representative method of model surface, triangular mesh, which commonly has the stereo lithography (stl) format, has recently been widely applied in the cad/cae/cam field, due to its superior robustness and high efficiency in tool-path generation. 3d product model optimization is of great importance for improvement of function, reduction of production material, and improvement of the company…	Gao, Yc	Gao, Yc;Flexible Mesh Morphing In Sustainable Design Using Data Mining And Mesh Subdivision	246
2020	10	Inverse Regression For Ridge Recovery: A Data-Driven Approach For Parameter Reduction In Computer Experiments	Sufficient Dimension Reduction;Ridge Functions;Ridge Recovery	Dimension Reduction;Graphics;Subspace;Design	Statistics And Computing	Glaws, At;Constantine, Pg;Cook, Rd	Univ Colorado;Univ Minnesota	Usa	Glaws, Andrew T;Constantine, Paul G;Cook, R Dennis	Computer Science, Theory & Methods;Statistics & Probability	Computer Science;Mathematics	0	18	11	18	52	MAR	Ben L. Fryrear Ph.D. Fellowship In Computational Science At The Colorado School Of Mines;Department Of Defense, Defense Advanced Research Projects Agency'S Program Enabling Quantification Of Uncertainty In Physical Systems;Us Department Of Energy Office Of Science, Office Of Advanced Scientific Computing Research, Applied Mathematics Program [De-Sc-0011077]	Glaws, At (Corresponding Author), Univ Colorado, Dept Comp Sci, Boulder, Co 80309 Usa.			Wos:000514315700003	10.1007/S11222-019-09876-Y	parameter reduction can enable otherwise infeasible design and uncertainty studies with modern computational science models that contain several input parameters. in statistical regression, techniques for sufficient dimension reduction (sdr) use data to reduce the predictor dimension of a regression problem. a computational scientist hoping to use sdr for parameter reduction encounters a problem:…	Glaws, At	Glaws, At;Inverse Regression For Ridge Recovery: A Data-Driven Approach For Parameter Reduction In Computer Experiments	399
2020	0	Mining Affective Needs From Online Opinions For Design Innovation	Customer Affective Needs;Product Design;Kano Model;Ke;Online Review;Text Mining	Affective Features;Product Reviews;Kano;Qfd	Web And Big Data, Pt Ii, Apweb-Waim 2020	Jia, Dp;Jin, J	Beijing Normal Univ	Peoples R China	Jia, Danping;Jin, Jian	Computer Science, Artificial Intelligence;Computer Science, Software Engineering;Computer Science, Theory & Methods;Telecommunications	Computer Science;Telecommunications	0	2	0	2	20	Missing Fields	National Nature Science Foundation Of China;Nsfc [71701019/G0114];National Social Science Foundation Of China [19Atq005]	Jin, J (Corresponding Author), Beijing Normal Univ, Dept Informat Management, Beijing 100875, Peoples R China.			Wos:001297303200025	10.1007/978-3-030-60290-1_25	innovative product features may gain higher brand reputation with lower cost for companies. besides functional features, products having differential advantages on aesthetic design are acknowledged to be attractive in the market. as a result, exploring customer affective needs plays a critical role in product design innovation. in this paper, a hybrid method is proposed to reveal and classify cus…	Jia, Dp	Jia, Dp;Mining Affective Needs From Online Opinions For Design Innovation	360
2020	2	New Production Development And Research Based On Interactive Evolution Design And Emotional Need	Interactive Genetic Algorithm;Customer Demand;User Fatigue;User Emotional Preference;Production Design	Kanos Model;Innovation;Form	Engineering Psychology And Cognitive Ergonomics. Mental Workload, Human Physiology, And Human Energy, Epce 2020, Pt I	Wang, Tx;Zhou, My	East China Univ Sci & Technol	Peoples R China	Wang, Tianxiong;Zhou, Meiyu	Engineering, Multidisciplinary;Ergonomics;Psychology, Multidisciplinary	Engineering;Psychology	0	2	2	2	44	Missing Fields	Missing Fields	Wang, Tx (Corresponding Author), East China Univ Sci & Technol, Sch Art Design & Media, 130 Meilong Rd, Shanghai 200237, Peoples R China.			Wos:001286439900019	10.1007/978-3-030-49044-7_19	due to the continuous release of new products, manufacturers must design products constantly to meet the diversified and differentiated needs of customers. in order to avoid the displacement by market competitors, enterprises and manufacturers must study the multiple combinations of product shapes to design products for meeting user's needs. at the same time, users' consumption levels and aesthet…	Wang, Tx	Wang, Tx;New Production Development And Research Based On Interactive Evolution Design And Emotional Need	165
2020	3	Parametric Design And Kansei Engineering In Goblet Styling Design	Missing Fields	Generative Design;4-Bar Mechanisms;Planar	Mathematical Problems In Engineering	Wu, Fg;Yu, Cz	Toko Univ;Natl Cheng Kung Univ	Taiwan	Wu, Fong-Gong;Yu, Chii-Zen	Engineering, Multidisciplinary;Mathematics, Interdisciplinary Applications	Engineering;Mathematics	3	53	3	53	50	MAR 19	Missing Fields	Yu, Cz (Corresponding Author), Natl Cheng Kung Univ, Dept Ind Design, Tainan 70101, Taiwan;Yu, Cz (Corresponding Author), Toko Univ, Dept Animat & Game Design, Puzi 61363, Chiayi, Taiwan.			Wos:000522944000023	10.1155/2020/8259698	in this study, we developed a computer-aided product design method for goblet styling design based on two methods. the first was parametric design derived from an adjustable cam mechanism, which was used for shape generation, and the second was kansei engineering, which was used for shape evaluation. in the shape generation method, motion curves from an adjustable cam were used. designers can col…	Wu, Fg	Wu, Fg;Parametric Design And Kansei Engineering In Goblet Styling Design	156
2020	1	Printmaking, Puzzles, And Studio Closets: Using Artistic Metaphors To Reimagine The User Interface For Designing Immersive Visualizations	Art And Visualization;User Interfaces;Data Visualization;Visualization Design	Missing Fields	2020 Ieee Vis Arts Program (Visap 2020)	Herman, B;Samsel, F;Bares, A;Johnson, S;Abram, G;Keefe, Df	Univ Minnesota Twin Cities;Univ Texas Austin	Usa	Herman, Bridger;Samsel, Francesca;Bares, Annie;Johnson, Seth;Abram, Greg;Keefe, Daniel F	Art;History & Philosophy Of Science;Social Sciences, Mathematical Methods	Art;History & Philosophy Of Science;Mathematical Methods In Social Sciences	0	6	1	6	47	Missing Fields	National Science Foundation [Iis-1704604, Iis-1704904];U.S. Department Of Energy (Doe), Office Of Science, Office Of Biological And Environmental Research [De-Foa-0001726, Deac02-06Ch11357, De-Ac05-00Or22725, De-Ac5206Na25396]	Herman, B (Corresponding Author), Univ Minnesota Twin Cities, Dept Comp Sci & Engn, Minneapolis, Mn 55455 Usa.			Wos:000853331900003	10.1109/Visap51628.2020.00009	we, as a society, need artists to help us interpret and explain science, but what does an artist's studio look like when today's science is built upon the language of large, increasingly complex data? this paper presents a data visualization design interface that lifts the barriers for artists to engage with actively studied, 3d multivariate datasets. to accomplish this, the interface must weave …	Herman, B	Herman, B;Printmaking, Puzzles, And Studio Closets: Using Artistic Metaphors To Reimagine The User Interface For Designing Immersive Visualizations	147
2020	2	Research On Recommendation Method Of Product Design Scheme Based On Multi-Way Tree And Learning-To-Rank	Product Design;Multi-Way Tree Model;Ahp;Topsis;Learning-To-Rank	Supplier Selection;Ahp-Topsis;System;Cost;Optimization	Machines	Chen, By;Hu, Xb;Huo, Yl;Deng, X	Sichuan Univ	Peoples R China	Chen, Boyang;Hu, Xiaobing;Huo, Yunliang;Deng, Xi	Engineering, Electrical & Electronic;Engineering, Mechanical	Engineering	2	30	3	30	46	JUN	National Science And Technology Major Project [2018Zx04032-001];Made In China 2025 Sichuan Action Plan [2018Zz011, 2017Zz018]	Hu, Xb (Corresponding Author), Sichuan Univ, Sch Mech Engn, Chengdu 610065, Peoples R China.			Wos:000551246200017	10.3390/Machines8020030	a product is composed of several components, and the number, type, and combination of components plays a crucial role in the process of product design. it is difficult to get an optimized scheme in a short time. in order to improve the efficiency of product design, a product design scheme recommendation algorithm based on multi-way tree and learning-to-rank is proposed. firstly, the product solut…	Chen, By	Chen, By;Research On Recommendation Method Of Product Design Scheme Based On Multi-Way Tree And Learning-To-Rank	122
2020	0	S-Fes: A Structure -Driven Modeling Strategy For Product Innovation Design	Functional Solution Model;Fbs;Mapping Model;Innovation Design	Scientific Ontology;Framework	Human Systems Engineering And Design Ii	Lin, Jy;Wu, Wy;Xue, Cq	Southeast Univ	Peoples R China	Lin, Jinyu;Wu, Wenyu;Xue, Chengqi	Computer Science, Artificial Intelligence;Computer Science, Cybernetics;Engineering, Industrial	Computer Science;Engineering	0	20	0	20	12	Missing Fields	National Natural Science Foundation Of China [71871056, 71471037]	Wu, Wy (Corresponding Author), Southeast Univ, Sch Mech Engn, Nanjing 211189, Peoples R China.			Wos:000625366900135	10.1007/978-3-030-27928-8_135	in this paper, based on the evolution of the functional solution model, a number of different (function-behavior-structure) fbs functional design mapping models are presented. it has found many limitations of the existing function solving model. the reuse of knowledge and mapping of post-redesign are separated. the order of mapping is difficult to judge in the image, cannot be integrated into the…	Lin, Jy	Lin, Jy;S-Fes: A Structure -Driven Modeling Strategy For Product Innovation Design	104
2020	2	The Data-Driven Product-Service Systems Design And Delivery (4Dpss) Methodology	Product-Service System;Data-Driven Design;Data-Driven Delivery	Missing Fields	Advances In Production Management Systems: Towards Smart And Digital Manufacturing, Pt Ii	Sala, R;Bertoni, A;Pirola, F;Pezzotta, G	Univ Bergamo;Blekinge Inst Technol	Sweden;Italy	Sala, Roberto;Bertoni, Alessandro;Pirola, Fabiana;Pezzotta, Giuditta	Computer Science, Information Systems;Telecommunications	Computer Science;Telecommunications	1	14	2	14	10	Missing Fields	Missing Fields	Sala, R (Corresponding Author), Univ Bergamo, Dept Management Informat & Prod Engn, Viale Marconi 5, I-24044 Dalmine, Bg, Italy.			Wos:000681218300037	10.1007/978-3-030-57997-5_37	the design of product-service systems (pss) has been approached from several perspectives like the process, innovation, engineering and operational ones providing, for each one of those, a specific view on the problem. this paper proposes a data-driven product-service system design and delivery (4dpss) methodology focusing on the collection and exploitation of delivery data to feed the design pha…	Sala, R	Sala, R;The Data-Driven Product-Service Systems Design And Delivery (4Dpss) Methodology	281
2020	6	Triple-Helix Structured Model Based On Problem-Knowledge-Solution Co-Evolution For Innovative Product Design Process	Innovative Design;Problem-Knowledge-Solution Co-Evolution;Design Activity;Design Process;Product Design	Strategies;Iteration	Chinese Journal Of Mechanical Engineering	Hui, Q;Li, Y;Tao, Y;Liu, Hw	Sichuan Univ;Innovat Method & Creat Design Key Lab Sichuan Pro	Peoples R China	Hui, Qian;Li, Yan;Tao, Ye;Liu, Hongwei	Engineering, Mechanical	Engineering	0	41	9	41	42	DEC 4	National Natural Science Foundation Of China [51435011]	Li, Y (Corresponding Author), Innovat Method & Creat Design Key Lab Sichuan Pro, Chengdu 610065, Peoples R China.			Wos:000596392600002	10.1186/S10033-020-00519-2	a design problem with deficient information is generally described as wicked or ill-defined. the information insufficiency leaves designers with loose settings, free environments, and a lack of strict boundaries, which provides them with more opportunities to facilitate innovation. therefore, to capture the opportunity behind the uncertainty of a design problem, this study models an innovative de…	Hui, Q	Hui, Q;Triple-Helix Structured Model Based On Problem-Knowledge-Solution Co-Evolution For Innovative Product Design Process	103
2021	6	A Cost-Efficient Data-Driven Approach To Design Space Exploration For Personalized Geometric Design In Additive Manufacturing	Computational Foundations For Additive Manufacturing;Computer Aided Design;Data-Driven Engineering	Microbial Fuel-Cells;Engineering Design;Optimization;Simulation;Systems	Journal Of Computing And Information Science In Engineering	Kang, Sk;Deng, Xw;Jin, R	Virginia Tech	Usa	Kang, Sungku;Deng, Xinwei;Jin, Ran	Computer Science, Interdisciplinary Applications;Engineering, Manufacturing	Computer Science;Engineering	0	15	6	15	50	DEC 1	Missing Fields	Kang, Sk (Corresponding Author), Virginia Tech, Data Sci & Visualizat Lab, Dept Ind & Syst Engn, Blacksburg, Va 24060 Usa.			Wos:000711433300012	10.1115/1.4050984	additive manufacturing (am) is considered as a key to personalized product realization as it provides great design flexibility. as the flexibility radically expands the design space, current design space exploration methods for personalized geometric designs become time-consuming due to the use of physically based computer simulations (e.g., finite element analysis or computational fluid dynamics…	Kang, Sk	Kang, Sk;A Cost-Efficient Data-Driven Approach To Design Space Exploration For Personalized Geometric Design In Additive Manufacturing	285
2021	9	A Data-Driven Automatic Design Method For Electric Machines Based On Reinforcement Learning And Evolutionary Optimization	Optimization;Reactive Power;Electric Machines;Reinforcement Learning;Design Methodology;Shape;Stochastic Processes;Cma-Es;Design Optimization;Electric Machine;Evolutionary Algorithms;Reinforcement Learning;Tree Search	Renewable Energy;Motor;Algorithm;Pmsg;Go	Ieee Access	Sato, T;Fujita, M	Toshiba Energy Syst & Solut Corp	Japan	Sato, Takahiro;Fujita, Masafumi	Computer Science, Information Systems;Engineering, Electrical & Electronic;Telecommunications	Computer Science;Engineering;Telecommunications	1	19	9	19	41	Missing Fields	Missing Fields	Sato, T (Corresponding Author), Toshiba Energy Syst & Solut Corp, Yokohama, Kanagawa 2300045, Japan.			Wos:000652040800001	10.1109/Access.2021.3078668	the design problems of electric machines are actually treated as a kind of mixed-integer problem, because the machine shapes are defined by some integer variables, such as number of slots, and the other variables, such as the tooth width, which are here called the fundamental and shape variables, respectively. to automatically solve these design problems, this article presents an automatic design…	Sato, T	Sato, T;A Data-Driven Automatic Design Method For Electric Machines Based On Reinforcement Learning And Evolutionary Optimization	15
2021	4	A Data-Driven Decision-Making Approach For Complex Product Design Based On Deep Learning	Complex Product;Decision-Making;Deep Neural Learning;Big Data	Missing Fields	Proceedings Of The 2021 Ieee 24Th International Conference On Computer Supported Cooperative Work In Design (Cscwd)	Lai, Z;Fu, Sq;Yu, H;Lan, Sl;Yang, C	Beijing Inst Elect Syst Engn;Univ Chinese Acad Sci;Beijing Inst Technol	Peoples R China	Lai, Zou;Fu, Siqin;Yu, Hang;Lan, Shulin;Yang, Chen	Computer Science, Interdisciplinary Applications;Computer Science, Theory & Methods;Operations Research & Management Science	Computer Science;Operations Research & Management Science	4	29	4	29	11	Missing Fields	Open Fund Of State Key Laboratory Of Intelligent Manufacturing System Technology;Beijing Institute Of Technology Research Fund Program For Young Scholars;Chinese Academy Of Sciences;University Of Chinese Academy Of Sciences [Y92902Med2]	Lai, Z (Corresponding Author), Beijing Inst Technol, Sch Comp Sci & Technol, Beijing, Peoples R China.			Wos:000716858200041	10.1109/Cscwd49262.2021.9437761	traditional complex product design methods rely too much on the designer's experience and lack methodology, so they are susceptible to subjective factors. it is easy to overlook some critical influencing factors. the big data generated in the design process contains much knowledge and provides a new perspective for decision-making. this paper proposes a data-driven decision-making approach for co…	Lai, Z	Lai, Z;A Data-Driven Decision-Making Approach For Complex Product Design Based On Deep Learning	308
2021	10	A Digital Twin-Driven Method For Product Performance Evaluation Based On Intelligent Psycho-Physiological Analysis	Digital Twin;Product Performance Evaluation;Eeg;Riemann Geometry;Machine Learning;Computational Foundations For Engineering Optimization;Computer-Aided Design;Cyber Physical System Design And Operation;Machine Learning For Engineering Applications	Fuzzy Comprehensive Evaluation;Design	Journal Of Computing And Information Science In Engineering	Feng, Yx;Li, Md;Lou, Sh;Zheng, H;Gao, Yc;Tan, Jr	Zhejiang Univ;Beihang Univ	Peoples R China	Feng, Yixiong;Li, Mingdong;Lou, Shanhe;Zheng, Hao;Gao, Yicong;Tan, Jianrong	Computer Science, Interdisciplinary Applications;Engineering, Manufacturing	Computer Science;Engineering	7	96	10	96	46	JUN 1	National Key Research And Development Program Of China [2020Yfb1711700];National Natural Science Foundation Of China [52075479, 51935009];Taizhou Science And Technology Project [1801Gy23];Hengda Fuji Elevator Co., Ltd.	Lou, Sh (Corresponding Author), Zhejiang Univ, Key Lab Adv Mfg Technol Zhejiang Prov, State Key Lab Fluid Power & Mechatron Syst, Hangzhou 310027, Peoples R China.			Wos:000651510900009	10.1115/1.4049895	digital twin, a new emerging and fast-growing technology which is one of the most promising technologies for smart design and manufacturing, has attracted much attention worldwide recently. with the application of digital twin, product performance evaluation has entered the data-driven era. however, traditional methods for evaluation mainly place emphasis on structure analysis in the stage of man…	Feng, Yx	Feng, Yx;A Digital Twin-Driven Method For Product Performance Evaluation Based On Intelligent Psycho-Physiological Analysis	364
2021	4	A Product Styling Design Evaluation Method Based On Multilayer Perceptron Genetic Algorithm Neural Network Algorithm	Missing Fields	Biogeography-Based Optimization;Classification;Maps	Computational Intelligence And Neuroscience	Wu, J	Sch Anyang Inst Technol	Peoples R China	Wu, Jie	Mathematical & Computational Biology;Neurosciences	Mathematical & Computational Biology;Neurosciences & Neurology	3	28	4	28	22	DEC 2	Missing Fields	Wu, J (Corresponding Author), Sch Anyang Inst Technol, Anyang 45500, Henan, Peoples R China.			Wos:000766321800005	10.1155/2021/2861292	products no longer exist simply as carriers of useful functions, but more and more consumers are beginning to pay attention to the spiritual aspects of the feelings brought by products. this paper brings machine learning algorithms to the discipline of industrial design and proposes a method to evaluate the design of product shapes using a multilayer perceptron genetic algorithm neural network (g…	Wu, J	Wu, J;A Product Styling Design Evaluation Method Based On Multilayer Perceptron Genetic Algorithm Neural Network Algorithm	176
2021	19	A Revisit Of Shape Editing Techniques: From The Geometric To The Neural Viewpoint	Mesh Deformation;Man-Made Model Editing;Deformation Representation;Optimization;Deep Learning	Deformation;Driven;Skeleton;Space;Animation;Models;Reconstruction;Interpolation;Decomposition;Framework	Journal Of Computer Science And Technology	Yuan, Yj;Lai, Yk;Wu, T;Gao, L;Liu, Lg	Univ Chinese Acad Sci;Univ Sci & Technol China;Chinese Acad Sci;Cardiff Univ	Wales;Peoples R China	Yuan, Yu-Jie;Lai, Yu-Kun;Wu, Tong;Gao, Lin;Liu, Ligang	Computer Science, Hardware & Architecture;Computer Science, Software Engineering	Computer Science	6	47	20	47	287	JUN	National Natural Science Foundation Of China [62061136007, 61872440];Royal Society Newton Advanced Fellowship [Naf Nr2N192151];Science And Technology Service Network Initiative, Chinese Academy Of Sciences [Kfj-Sts-Qyzd-2021-11-001];Youth Innovation Promotion Association Cas	Gao, L (Corresponding Author), Chinese Acad Sci, Inst Comp Technol, Beijing Key Lab Mobile Comp & Pervas Device, Beijing 100190, Peoples R China;Gao, L (Corresponding Author), Univ Chinese Acad Sci, Beijing 100049, Peoples R China.			Wos:000661905700006	10.1007/S11390-021-1414-9	3d shape editing is widely used in a range of applications such as movie production, computer games and computer aided design. it is also a popular research topic in computer graphics and computer vision. in past decades, researchers have developed a series of editing methods to make the editing process faster, more robust, and more reliable. traditionally, the deformed shape is determined by the…	Yuan, Yj	Yuan, Yj;A Revisit Of Shape Editing Techniques: From The Geometric To The Neural Viewpoint	144
2021	0	Approaches For Full Coverage Physical Design Space Exploration & Analysis By Synthetic Layout Generation	Dtco;Dse;Synthetic Layout Generation;Monte Carlo Methods;Hierarchical Classification;Genealogy Classification	Missing Fields	Design-Process-Technology Co-Optimization For Manufacturability Xiv	Shafee, M;Kwan, J;El-Manhawy, W;Kabeel, A;Risk, S;Park, J;Lee, S;Kim, Jh;Alaa, M;Bahnasawi, M;Abdelrazek, A;Hammouda, S;Madkour, K;Sabry, N	Mansoura Univ;Mentor;Nabla Adv Syst	Usa;South Korea;Egypt	Shafee, Marwah;Kwan, Joe;El-Manhawy, Wael;Kabeel, Aliaa;Risk, Sarah;Park, Jongha;Lee, Seungjo;Kim, Jin Hee;Alaa, Mostafa;Bahnasawi, Mohamed;Abdelrazek, Abdelrahman;Hammouda, Sherif;Madkour, Kareem;Sabry, Nabil	Computer Science, Artificial Intelligence;Engineering, Manufacturing;Optics	Computer Science;Engineering;Optics	0	3	0	3	3	Missing Fields	Missing Fields	Shafee, M (Corresponding Author), Mentor, 78 El Nozha St, Cairo, Egypt.			Wos:000671888300005	10.1117/12.2551916	at the core of design-technology co-optimization (dtco) processes, is the design space exploration (dse), where different design schemes and patterns are systematically analyzed and design rules & processes are co-optimized for optimal yield and performance before real products are designed. synthetic layout generation offers a solution. with rules-based synthetic layout generation, engineers des…	Shafee, M	Shafee, M;Approaches For Full Coverage Physical Design Space Exploration & Analysis By Synthetic Layout Generation	197
2021	2	Data Exchange For Digital Government: Where Are We Heading? Adbis2021 Keynote	Digital Government;E-Government;Data Governance;Consent Management;Data Exchange Layers;X-Road;Gaia-X;European Blockchain Services Infrastructure;Ebsi;Fiware	Missing Fields	Advances In Databases And Information Systems, Adbis 2021	Draheim, D	Tallinn Univ Technol	Estonia	Draheim, Dirk	Computer Science, Artificial Intelligence;Computer Science, Information Systems;Computer Science, Interdisciplinary Applications;Computer Science, Theory & Methods	Computer Science	1	33	2	33	27	Missing Fields	Missing Fields	Draheim, D (Corresponding Author), Tallinn Univ Technol, Informat Syst Grp, Tallinn, Estonia.			Wos:000775738600002	10.1007/978-3-030-82472-3_2	in all countries, we currently see major efforts in digital transformation initiatives. the united nations e-government survey 2020 puts a strong emphasis on data, which makes sense, given the huge progress in big data and data science in the last decade. the un survey distinguishes between data-informed, data-driven and data-centric approaches to digital government. actually, gartner defined the…	Draheim, D	Draheim, D;Data Exchange For Digital Government: Where Are We Heading? Adbis2021 Keynote	55
2021	4	Data-Driven Approach To Identify Obsolete Functions Of Products For Design Improvements	Customer Requirement Evolution;Observing Parameters Of Functional Performance;Obsolete Function;Design Improvement	Integrated Approach;Online Reviews;Identification;Redesign;Performance;Components;Tracking	Journal Of Intelligent & Fuzzy Systems	Zhao, Zh;Li, Yp;Chu, Xn	Shanghai Jiao Tong Univ;China Univ Min & Technol	Peoples R China	Zhao, Zhihua;Li, Yupeng;Chu, Xuening	Computer Science, Artificial Intelligence	Computer Science	2	52	4	52	34	Missing Fields	National Natural Science Foundation, China [51505480, 51875345];Postgraduate Research & Practice Innovation Program Of Jiangsu Province [Kycx20 2069];Future Outstanding Talents Of China University Of Mining And Technology [2020Wljcrczl006]	Li, Yp (Corresponding Author), China Univ Min & Technol, Sch Mines, Dept Ind Engn, Xuzhou, Jiangsu, Peoples R China.			Wos:000626775000103	10.3233/Jifs-202144	identifying defective design elements is a prerequisite for design improvements. previous identification methods were implemented in the context of static customer requirements (crs). however, crs always evolve continuously, which easily leads to a failure of existing product functions in fulfilling customer expectations; this, in turn, can lead to a decline in customer satisfaction. in this stud…	Zhao, Zh	Zhao, Zh;Data-Driven Approach To Identify Obsolete Functions Of Products For Design Improvements	315
2021	29	Data-Driven Approaches Toward Smarter Additive Manufacturing	Additive Manufacturing;Artificial Intelligence;Machine Learning;Material Designs;Tool Paths;Topology Optimizations	Structure-Property Linkages;Topology Optimization;Composite-Materials;Polymer Composites;Elastic Properties;Structure Design;Heat-Transfer;Ab-Initio;Laser;Simulation	Advanced Intelligent Systems	Tian, Cx;Li, Tj;Bustillos, J;Bhattacharya, S;Turnham, T;Yeo, Jj;Moridi, A	Cornell Univ	Usa	Tian, Chenxi;Li, Tianjiao;Bustillos, Jenniffer;Bhattacharya, Shonak;Turnham, Talia;Yeo, Jingjie;Moridi, Atieh	Automation & Control Systems;Computer Science, Artificial Intelligence;Robotics	Automation & Control Systems;Computer Science;Robotics	3	84	32	84	178	DEC	Knight @ Kic Engineering Graduate Fellowship	Yeo, Jj;Moridi, A (Corresponding Author), Cornell Univ, Mech & Aerosp Engn, 124 Hoy Rd,Upson Hall, Ithaca, Ny 14850 Usa.			Wos:000677681100001	10.1002/Aisy.202100014	the latest industrial revolution, industry 4.0, is driven by the emergence of digital manufacturing and, most notably, additive manufacturing (am) technologies. the simultaneous material and structure forming in am broadens the material and structural design space. this expanded design space holds a great potential in creating improved engineering materials and products that attract growing inter…	Tian, Cx	Tian, Cx;Data-Driven Approaches Toward Smarter Additive Manufacturing	304
2021	25	Data-Driven Product Design Evaluation Method Based On Multi-Stage Artificial Neural Network	Data Driven;Product Design Evaluation;Artificial Neural Network;Particle Swarm Optimization;Adam Algorithm	Biogeography-Based Optimization;Evaluation Model;Fuzzy Ahp;Resource-Allocation;Material Selection;Service;Efficiency;Algorithm;Strategy;Systems	Applied Soft Computing	Wang, L;Liu, Zc	Wuhan Univ Technol;Jiangxi Univ Sci & Technol	Peoples R China	Wang, Lei;Liu, Zhengchao	Computer Science, Artificial Intelligence;Computer Science, Interdisciplinary Applications	Computer Science	2	48	25	48	61	MAY	National Natural Science Foundation Of China [51905396];Fundamental Research Funds For The Central Universities, China [Wut: 2019Iva018, 2019Iii139Cg];Special Fund For High-Level Talent Research Of Jiangxi University Of Science And Technology, China [205200100501]	Liu, Zc (Corresponding Author), Jiangxi Univ Sci & Technol, Sch Mech & Elect Engn, Ganzhou 341000, Peoples R China.			Wos:000635181700001	10.1016/J.Asoc.2021.107117	the application of the new generation of it technology in the manufacturing industry has brought a rich data foundation for the research of product life cycle management. however, in the product design stage, the existing design evaluation methods have not yet effectively used the data-driven advantages, which leads to over-reliance on personal experience and inefficiency. this paper presents a n…	Wang, L	Wang, L;Data-Driven Product Design Evaluation Method Based On Multi-Stage Artificial Neural Network	119
2021	0	Data-Driven Sketch Beautification With Neural Feature Representation	Shape;Feature Extraction;Optimization;Visualization;Strain;Costs;Semantics	Missing Fields	Ieee Computer Graphics And Applications	Shen, Ic	Univ Tokyo	Japan	Shen, I-Chao	Computer Science, Software Engineering	Computer Science	0	3	0	3	20	SEP 24	Mediatek Fellowship;Jsps Kakenhi [Jp21F20075];Grants-In-Aid For Scientific Research [21F20075] Funding Source: Kaken	Shen, Ic (Corresponding Author), Univ Tokyo, Grad Sch Informat Sci & Technol, Tokyo 1138654, Japan.			Wos:000825975100002	10.1109/Mcg.2021.3115181	this article presents a data-driven approach for beautifying freehand sketches. our key premise is that the artist-drawn vector can be used to sketch visually appealing shapes, such as local shapes with a clean appearance and better global visual properties (e.g., symmetry). however, these merits may not apply to all object categories. in this article, we use a neural network to represent local a…	Shen, Ic	Shen, Ic;Data-Driven Sketch Beautification With Neural Feature Representation	11
2021	2	Exploiting Generative Models For Performance Predictions Of 3D Car Designs	Representation Learning;3D Point Clouds;Autoencoder;Variational Autoencoder;Regression Analysis	Representation	2021 Ieee Symposium Series On Computational Intelligence (Ieee Ssci 2021)	Saha, S;Rios, T;Minku, Ll;Stein, Bv;Wollstadt, P;Yao, X;Bäck, T;Sendhoff, B;Menzel, S	Univ Birmingham;Leiden Inst Adv Comp Sci Liacs;Southern Univ Sci & Technol;Honda Res Inst Europe Gmbh	England;Germany;Netherlands;Peoples R China	Saha, Sneha;Rios, Thiago;Minku, Leandro L;Stein, Bas Vas;Wollstadt, Patricia;Yao, Xin;Back, Thomas;Sendhoff, Bernhard;Menzel, Stefan	Computer Science, Artificial Intelligence;Engineering, Electrical & Electronic;Operations Research & Management Science;Mathematics, Applied	Computer Science;Engineering;Operations Research & Management Science;Mathematics	1	14	2	14	23	Missing Fields	European Union [766186]	Saha, S (Corresponding Author), Honda Res Inst Europe Gmbh, Carl Legien Str 30, D-63073 Offenbach, Germany.			Wos:000824464300214	10.1109/Ssci50451.2021.9660034	in automotive digital development, engineers utilize multiple virtual prototyping tools to design and assess the performance of 3d shapes. however, accurate performance simulations are computationally expensive and time-consuming, which may be prohibitive for design optimization tasks. to address this challenge, we envision a 3d design assistance system for design exploration with performance ass…	Saha, S	Saha, S;Exploiting Generative Models For Performance Predictions Of 3D Car Designs	25
2021	6	Exploiting Local Geometric Features In Vehicle Design Optimization With 3D Point Cloud Autoencoders	Design Representation;Shape Optimization;Point Cloud Autoencoder;Sensitivity Analysis	Missing Fields	2021 Ieee Congress On Evolutionary Computation (Cec 2021)	Rios, T;Van Stein, B;Wollstadt, P;Bäck, T;Sendhoff, B;Menzel, S	Leiden Univ;Honda Res Inst Europe Gmbh	Germany;Netherlands	Rios, Thiago;Van Stein, Bas;Wollstadt, Patricia;Back, Thomas;Sendhoff, Bernhard;Menzel, Stefan	Computer Science, Artificial Intelligence;Computer Science, Theory & Methods;Engineering, Electrical & Electronic;Mathematical & Computational Biology;Operations Research & Management Science	Computer Science;Engineering;Mathematical & Computational Biology;Operations Research & Management Science	0	9	7	9	34	Missing Fields	European Union [766186];Marie Curie Actions (Msca) [766186] Funding Source: Marie Curie Actions (Msca)	Rios, T (Corresponding Author), Honda Res Inst Europe Gmbh, Offenbach, Germany.			Wos:000703866100065	10.1109/Cec45853.2021.9504746	methods for learning and compressing high-dimensional data allow designers to generate novel and low-dimensional design representations for shape optimization problems. by using compact design spaces, global optimization algorithms require less function evaluations to characterize the problem landscape. furthermore, data-driven representations are often domain-agnostic and independent of the user…	Rios, T	Rios, T;Exploiting Local Geometric Features In Vehicle Design Optimization With 3D Point Cloud Autoencoders	37
2021	14	Fusion Of Cognitive Information: Evaluation And Evolution Method Of Product Image Form	Missing Fields	Missing Fields	Computational Intelligence And Neuroscience	Zhang, St;Su, Pf;Liu, Sf	Lanzhou Univ Technol	Peoples R China	Zhang, Shutao;Su, Pengfei;Liu, Shifeng	Mathematical & Computational Biology;Neurosciences	Mathematical & Computational Biology;Neurosciences & Neurology	4	65	14	65	53	MAR 17	National Natural Science Foundation Of China [51705226];Natural Science Foundation Of Gansu Province [20Jr10Ra168]	Zhang, St (Corresponding Author), Lanzhou Univ Technol, Sch Design Art, Lanzhou 730050, Peoples R China.			Wos:000636073900001	10.1155/2021/5524093	in order to realize the stability and inheritance of image characteristics in the development process of a series of products, we comprehensively analyzed the cognitive differences among users, designers, and engineers and propose a multicriteria decision system for an intelligent design method of product forms based on a logistic regression model, relative entropy theory, and preference mapping …	Zhang, St	Zhang, St;Fusion Of Cognitive Information: Evaluation And Evolution Method Of Product Image Form	180
2021	26	Hull Shape Design Optimization With Parameter Space And Model Reductions, And Self-Learning Mesh Morphing	Shape Optimization;Reduced Order Modeling;High-Dimensional Optimization;Parameter Space Reduction;Computational Fluid Dynamics	Reduced-Order Model	Journal Of Marine Science And Engineering	Demo, N;Tezzele, M;Mola, A;Rozza, G	Sissa	Italy	Demo, Nicola;Tezzele, Marco;Mola, Andrea;Rozza, Gianluigi	Engineering, Marine;Engineering, Ocean;Oceanography	Engineering;Oceanography	2	17	26	17	54	FEB	Fincantieri S.P.A.;Project Ube2-"Underwater Blue Efficiency 2" - Regione Fvg, Por-Fesr 2014-2020, Piano Operativo Regionale Fondo Europeo Per Lo Sviluppo Regionale;European Union Funding For Research And Innovation-Horizon 2020 Program Of The European Research Council Executive Agency: H2020 Erc Cog 2015 Aroma-Cfd Project [681447]	Demo, N (Corresponding Author), Sissa, Mathlab, Math Area, Via Bonomea 265, I-34136 Trieste, Italy.			Wos:000622615400001	10.3390/Jmse9020185	in the field of parametric partial differential equations, shape optimization represents a challenging problem due to the required computational resources. in this contribution, a data-driven framework involving multiple reduction techniques is proposed to reduce such computational burden. proper orthogonal decomposition (pod) and active subspace genetic algorithm (asga) are applied for a dimensi…	Demo, N	Demo, N;Hull Shape Design Optimization With Parameter Space And Model Reductions, And Self-Learning Mesh Morphing	22
2021	32	Idea Generation With Technology Semantic Network	Data-Driven Design;Flying Car;Idea Generation;Semantic Distance;Technology Semantic Network	Analogy;Novelty;Distance;Patents;Paths	Ai Edam-Artificial Intelligence For Engineering Design Analysis And Manufacturing	Sarica, S;Song, By;Luo, Jx;Wood, Kl	Univ Colorado;Penn State Univ;Singapore Univ Technol & Design	Usa;Singapore	Sarica, Serhad;Song, Binyang;Luo, Jianxi;Wood, Kristin L	Computer Science, Artificial Intelligence;Computer Science, Interdisciplinary Applications;Engineering, Multidisciplinary;Engineering, Manufacturing	Computer Science;Engineering	6	41	32	41	69	AUG	Missing Fields	Sarica, S (Corresponding Author), Singapore Univ Technol & Design, Engn Product Dev Pillar, Singapore, Singapore.			Wos:000721371600003	10.1017/S0890060421000020	there are growing efforts to mine public and common-sense semantic network databases for engineering design ideation stimuli. however, there is still a lack of design ideation aids based on semantic network databases that are specialized in engineering or technology-based knowledge. in this study, we present a new methodology of using the technology semantic network (technet) to stimulate idea ge…	Sarica, S	Sarica, S;Idea Generation With Technology Semantic Network	363
2021	2	Model Construction For Complex Product Design Change With Improved Dendritic Neural Network	Design Change;Change Propagation;Dendrite Neural Network;Complex Network	Change Propagation	Ieee International Conference On Recent Advances In Systems Science And Engineering (Ieee Rasse 2021)	Li, Zm;Sun, Xy;Chen, X;Zhang, Y;Li, Qk;Peng, C	China Univ Min & Technol;Shanghai Univ;Beijing Informat Sci & Technol Univ	Peoples R China	Li, Zimin;Sun, Xiaoyan;Chen, Xun;Zhang, Yong;Li, Qingkui;Peng, Chen	Computer Science, Hardware & Architecture;Computer Science, Information Systems;Computer Science, Software Engineering;Engineering, Multidisciplinary	Computer Science;Engineering	0	4	2	4	20	Missing Fields	National Key Research And Development Program Of China [2020Yfb1708200]	Sun, Xy (Corresponding Author), China Univ Min & Technol, Sch Informat & Control Engn, Xuzhou, Jiangsu, Peoples R China.			Wos:000782441400009	10.1109/Rasse53195.2021.9686817	design changes are widespread during the produce development due to many uncertain factors, e.g., the impact of the epidemic on the supply chain, changes in customer demands, and upgrades demand by the produce production itself. it is very important for companies to predict product's parameter changes and clarify the mechanism of change propagation for saving costs and improving efficiency. howev…	Li, Zm	Li, Zm;Model Construction For Complex Product Design Change With Improved Dendritic Neural Network	358
2021	16	Operating Data-Driven Inverse Design Optimization For Product Usage Personalization With An Application To Wheel Loaders	Data-Driven Optimization;Inverse Design;Product Usage Analytics;Product Operating Data;Product Usage Personalization	Mass Customization;Requirements;Information;Smart	Journal Of Industrial Information Integration	Zhang, W;Wang, Sj;Hou, L;Jiao, Rj	Xiamen Univ;Georgia Inst Technol	Usa;Peoples R China	Zhang, Wei;Wang, Shaojie;Hou, Liang;Jiao, Roger J	Computer Science, Interdisciplinary Applications;Engineering, Industrial	Computer Science;Engineering	4	75	18	75	54	SEP	Local Special Projects Guided By The Central Government [2020L3002];National Key R&D Program Of China [2020Yfb1709901];National Natural Science Foundation Of China [51975495]	Hou, L (Corresponding Author), Xiamen Univ, Dept Mech Elect Engn, Xiamen, Peoples R China;Jiao, Rj (Corresponding Author), Georgia Inst Technol, Sch Mech Engn, Atlanta, Ga 30332 Usa.			Wos:000687934200002	10.1016/J.Jii.2021.100212	traditional design requires designers to envisage a product operating environment in order to identify customer needs. analyzing product usage context by collecting actual product operating data during the product in use empowers new opportunities for the projection of requirement specifications and understanding of use case scenarios. this paper proposes a data-driven inverse design optimization…	Zhang, W	Zhang, W;Operating Data-Driven Inverse Design Optimization For Product Usage Personalization With An Application To Wheel Loaders	274
2021	28	Product Innovation Concept Generation Based On Deep Learning And Kansei Engineering	Deep Learning;Pcga-Dlke;Kansei Engineering;Pd-Gan;Product Concept Generation	Genetic Algorithm;Design;Network;Elements;Needs	Journal Of Engineering Design	Li, X;Su, Jn;Zhang, Zp;Bai, Rs	Lanzhou City Univ;Lanzhou Univ Technol	Peoples R China	Li, Xiong;Su, Jianning;Zhang, Zhipeng;Bai, Ruisheng	Engineering, Multidisciplinary	Engineering	37	307	32	307	67	OCT 3	National Natural Science Foundation Of China [51465037]	Su, Jn (Corresponding Author), Lanzhou Univ Technol, Sch Design Art, Lanzhou, Peoples R China.			Wos:000657539500001	10.1080/09544828.2021.1928023	industrial designers often present their initial concepts as design sketches. rapid creation of new product conceptual images that meet users' affective preferences remains challenging in real design environments. however, few published works in affective design directly assist industrial designers in creating product conceptual images. thus, we propose a product concept generation approach frame…	Li, X	Li, X;Product Innovation Concept Generation Based On Deep Learning And Kansei Engineering	153
2021	25	Radical Innovation Of Product Design Using An Effect Solving Method	Product Design;Radical Innovation;Triz;Effect Solving Method (Esm);Wind Turbine	Conceptual Design;Triz;Management;Ideas;Model	Computers & Industrial Engineering	Wang, K;Tan, Rh;Peng, Qj;Sun, Yd;Li, Hy;Sun, Jg	Univ Manitoba;Hebei Univ Technol	Canada;Peoples R China	Wang, Kang;Tan, Runhua;Peng, Qingjin;Sun, Yindi;Li, Haoyu;Sun, Jianguang	Computer Science, Interdisciplinary Applications;Engineering, Industrial	Computer Science;Engineering	13	93	26	93	75	JAN	National Natural Science Foundation Of China [51805142];Central Government Guides Local Science And Technology Development Project Of China [18241837G];National Innovation Method Fund Of China [2017Im040100]	Tan, Rh (Corresponding Author), Hebei Univ Technol, Sch Mech Engn, Tianjin 300401, Peoples R China.			Wos:000632959400042	10.1016/J.Cie.2020.106970	innovation activities are required for industry to develop competitive products in response to rapid changes of the market. radical innovation (ri) enables products long-term technical advantages and market competitiveness. however, the existing ri research focuses on areas of the business and management. there is a lack of an effective method of ri for product development. this paper proposes a …	Wang, K	Wang, K;Radical Innovation Of Product Design Using An Effect Solving Method	100
2021	0	Range-Gan: Range-Constrained Generative Adversarial Network For Conditioned Design Synthesis	Missing Fields	Missing Fields	Proceedings Of Asme 2021 International Design Engineering Technical Conferences And Computers And Information In Engineering Conference, Idetc-Cie2021, Vol 3B	Nobari, Ah;Chen, W;Ahmed, F	Mit;Siemens Technol	Usa	Nobari, Amin Heyrani;Chen, Wei;Ahmed, Faez	Computer Science, Interdisciplinary Applications;Engineering, Manufacturing;Engineering, Mechanical	Computer Science;Engineering	0	0	0	0	39	Missing Fields	Missing Fields	Nobari, Ah (Corresponding Author), Mit, Dept Mech Engn, Cambridge, Ma 02139 Usa.			Wos:001224347900039	Missing Fields	typical engineering design tasks require the effort to modify designs iteratively until they meet certain constraints, i.e., performance or attribute requirements. past work has proposed ways to solve the inverse design problem, where desired designs are directly generated from specified requirements, thus avoid the trial and error process. among those approaches, the conditional deep generative …	Nobari, Ah	Nobari, Ah;Range-Gan: Range-Constrained Generative Adversarial Network For Conditioned Design Synthesis	31
2021	3	Rapid Local Image Style Transfer Method Based On Residual Convolutional Neural Network	Image Style Transfer;Residual Neural Network;Semantic Segmentation;Deeplab2;Convolutional Neural Network	Missing Fields	Sensors And Materials	Huang, Lm;Wang, P;Yang, Cf;Tseng, Hw	Longyan Univ;Natl Univ Kaohsiung;Yango Univ;Chaoyang Univ Technol	Taiwan;Peoples R China	Huang, Liming;Wang, Ping;Yang, Cheng-Fu;Tseng, Hsien-Wei	Instruments & Instrumentation;Materials Science, Multidisciplinary	Instruments & Instrumentation;Materials Science	1	16	3	16	19	Missing Fields	Most [109-2622-E-390-001-Cc3, Most 109-2221-E-390-023];Young And Middle-Aged Teacher Program Of The Education Department Of Fujian [Jat200601]	Wang, P (Corresponding Author), Yango Univ, Coll Artificial Intelligence, Mawei Dist 350015, Fujian, Peoples R China;Yang, Cf (Corresponding Author), Natl Univ Kaohsiung, Dept Chem & Mat Engn, Kaohsiung 811, Taiwan;Yang, Cf (Corresponding Author), Chaoyang Univ Technol, Dept Aeronaut Engn, Taichung 413, Taiwan.			Wos:000640595600011	10.18494/Sam.2021.3172	the technology of image style transfer can learn the style of a target image in a fully automated or semi-automated way, which is often very difficult to achieve by manual methods, thus saving much time and improving production efficiency. with the rapid spread of commercial software applications such as beauty selfie apps and short entertainment videos such as tiktok, local image style transfer …	Huang, Lm	Huang, Lm;Rapid Local Image Style Transfer Method Based On Residual Convolutional Neural Network	166
2021	0	Research On Intelligent Generation Method Of Process Dimension Based On Feature Constraint	Process Dimension;Machining Removal Volume;Feature Constraint;Intelligent Dimensioning	Automatic-Generation;Parameter Ranges;3D	International Journal Of Advanced Manufacturing Technology	Zhou, Hg;Sheng, Ss;Liu, Jf;Zhao, P;Dong, Jw;Cao, Xw;Liu, Xj	Jiangsu Univ Sci & Technol;Southeast Univ	Peoples R China	Zhou, Honggen;Sheng, Sushan;Liu, Jinfeng;Zhao, Peng;Dong, Jianwei;Cao, Xuwu;Liu, Xiaojun	Automation & Control Systems;Engineering, Manufacturing	Automation & Control Systems;Engineering	4	22	1	22	31	SEP	National Natural Science Foundation Of China [52075229];Natural Science Foundation Of The Higher Education Institutions Of Jiangsu Province, China [20Kja460009]	Liu, Jf (Corresponding Author), Jiangsu Univ Sci & Technol, Sch Mech Engn, Zhenjiang 212100, Jiangsu, Peoples R China;Liu, Jf (Corresponding Author), Jiangsu Univ Sci & Technol, Jiangsu Prov Key Lab Adv Mfg Marine Mech Equipmen, Zhenjiang 212100, Jiangsu, Peoples R China.			Wos:000667423200002	10.1007/S00170-021-07045-Y	process dimensioning, as an important component of 3d process design, is the key to realize the high integration of computer-aided process planning(capp)and computer-aided design (cad) in intelligent manufacturing. at present, the product design dimension cannot express the process requirements, and the dimensioning method cannot meet the requirements of the rapid creation of the process model. f…	Zhou, Hg	Zhou, Hg;Research On Intelligent Generation Method Of Process Dimension Based On Feature Constraint	434
2021	6	Science Forum: Nanoscape, A Data-Driven 3D Real-Time Interactive Virtual Cell Environment	Missing Fields	Extracellular-Matrix;Crystal-Structure;Structural Basis;Receptor;Complex;Activation;Resolution;Ectodomain;Clathrin;Reveals	Elife	Kadir, Sr;Lilja, A;Gunn, N;Strong, C;Hughes, Rt;Bailey, Bj;Rae, J;Parton, Rg;Mcghee, J	Univ New South Wales;Univ Queensland	Australia	Kadir, Shereen R;Lilja, Andrew;Gunn, Nick;Strong, Campbell;Hughes, Rowan T;Bailey, Benjamin J;Rae, James;Parton, Robert G;Mcghee, John	Biology	Life Sciences & Biomedicine - Other Topics	0	11	7	11	104	JUN 30	Arc Centre Of Excellence In Convergent Bionano Science Technology [Ce140100036]	Mcghee, J (Corresponding Author), Univ New South Wales, Sch Art & Design, 3D Visualisat Aesthet Lab, Sydney, Nsw, Australia;Mcghee, J (Corresponding Author), Univ New South Wales, Arc Ctr Excellence Convergent Bionano Sci & Techn, Sydney, Nsw, Australia.			Wos:000669870500001	10.7554/Elife.64047	our understanding of cellular and structural biology has reached unprecedented levels of detail, and computer visualisation techniques can be used to create three-dimensional (3d) representations of cells and their environment that are useful in both teaching and research. however, extracting and integrating the relevant scientific data, and then presenting them in an effective way, can pose subs…	Kadir, Sr	Kadir, Sr;Science Forum: Nanoscape, A Data-Driven 3D Real-Time Interactive Virtual Cell Environment	397
2021	1	Sustained Cad/Cae Application Integration: Supporting Simplified Models	Computer Aided Design;Data-Driven Engineering;Multiphysics Modeling And Simulation;Virtual Prototyping;Computer Aided Engineering	Missing Fields	Journal Of Computing And Information Science In Engineering	Kirkwood, R;Sherwood, Ja	Univ Massachusetts Lowell	Usa	Kirkwood, Robert;Sherwood, James A	Computer Science, Interdisciplinary Applications;Engineering, Manufacturing	Computer Science;Engineering	0	30	1	30	27	FEB 1	Missing Fields	Kirkwood, R (Corresponding Author), Univ Massachusetts Lowell, Dept Mech Engn, 15 Macdonald Dr, Nashua, Nh 03062 Usa.			Wos:000608264100005	10.1115/1.4047536	computer-aided design/computer-aided manufacturing/computer-aided engineering (cad/cam/cae) integration offers designers, analysts, and manufacturers the opportunity to share the data throughout the product development process. finite element (fe) meshing applications integrated with the solid model data from cad systems represent a major subset of cad/cam/cae integration. in an earlier paper, it…	Kirkwood, R	Kirkwood, R;Sustained Cad/Cae Application Integration: Supporting Simplified Models	369
2021	120	The Transformation Of The Innovation Process: How Digital Tools Are Changing Work, Collaboration, And Organizations In New Product Development*	Missing Fields	R-And-D;Information-Technology;Knowledge Transfer;Dynamic Theory;Performance;Capabilities;Integration;Management;Design;Usage	Journal Of Product Innovation Management	Marion, Tj;Fixson, Sk	Innovat Masters Programs;Babson Coll;Northeasterns Damore Mckim Sch Business	Usa	Marion, Tucker J;Fixson, Sebastian K	Business;Engineering, Industrial;Management	Business & Economics;Engineering	21	347	124	347	115	JAN	Missing Fields	Marion, Tj (Corresponding Author), Northeastern Univ, Entrepreneurship & Innovat Grp, 360 Huntington Ave,209 Hayden Hall, Boston, Ma 02115 Usa.			Wos:000563779100001	10.1111/Jpim.12547	over the past several decades, digitization has invaded all areas of human activity, including innovation. the result of digitization of existing tools for design and collaboration, and the introduction of entirely new digital tools, is a far more substantive change of innovation than previous generations of tools enabled. it affects not only the quality of the output and speed of its generation,…	Marion, Tj	Marion, Tj;The Transformation Of The Innovation Process: How Digital Tools Are Changing Work, Collaboration, And Organizations In New Product Development*	239
2021	8	Topologically Optimal Design And Failure Prediction Using Conditional Generative Adversarial Networks	Conditional Generative Adversarial Networks;Data-Driven Topology Optimization;Stress Prediction;Topology Optimization;Von-Mises Stress	Optimization	International Journal For Numerical Methods In Engineering	Herath, S;Haputhanthri, U	Univ Moratuwa	Sri Lanka	Herath, Sumudu;Haputhanthri, Udith	Engineering, Multidisciplinary;Mathematics, Interdisciplinary Applications	Engineering;Mathematics	3	22	10	22	69	DEC 15	Missing Fields	Herath, S (Corresponding Author), Univ Moratuwa, Dept Civil Engn, Moratuwa 10400, Sri Lanka.			Wos:000693585600001	10.1002/Nme.6814	among the various structural optimization tools, topology optimization is the widely used technique in obtaining the initial design of structural components. the resulting topologically optimal initial design will be the input for subsequent structural optimizations such as shape, size and layout optimizations. however, iterative solvers used in conventional topology optimization schemes are know…	Herath, S	Herath, S;Topologically Optimal Design And Failure Prediction Using Conditional Generative Adversarial Networks	42
2021	4	Topology Constrained Shape Correspondence	Shape;Topology;Heating Systems;Manifolds;Image Reconstruction;Kernel;Strain;Topology Preservation;Shape Correspondence;Locally Linear Embedding;Graph Convolution	Object Recognition;Registration;Descriptors	Ieee Transactions On Visualization And Computer Graphics	Li, X;Wen, Cc;Wang, Lj;Fang, Y	Nyu Tandon & Abu Dhabi;Nyu Tandon Sch Engn	U Arab Emirates	Li, Xiang;Wen, Congcong;Wang, Lingjing;Fang, Yi	Computer Science, Software Engineering	Computer Science	0	7	4	7	53	OCT 1	Nyu Abu Dhabi Institute [Ad131]	Fang, Y (Corresponding Author), Nyu Tandon & Abu Dhabi, Nyu Abu Dhabi, Nyu Multimedia & Visual Comp Lab, Abu Dhabi, U Arab Emirates.			Wos:000692890200007	10.1109/Tvcg.2020.2994013	to better address the deformation and structural variation challenges inherently present in 3d shapes, researchers have shifted their focus from designing handcrafted point descriptors to learning point descriptors and their correspondences in a data-driven manner. recent studies have developed deep neural networks for robust point descriptor and shape correspondence learning in consideration of …	Li, X	Li, X;Topology Constrained Shape Correspondence	27
2021	1	Using Kansei Semantic Differential Method And Grey Relational Analysis In The Exploration Of Product Form Image Cognition Representation	Kansei Semantic Differential Method;Product Form;Image Cognition;Grey Relational Analysis	Missing Fields	Advances In Industrial Design, Ahfe 2021	Qiu, Gp;Yuan, Jl;Chen, J;Lin, Mc	Sanming Univ	Peoples R China	Qiu, Guo-Peng;Yuan, Jia-Li;Chen, Jing;Lin, Ming-Chyuan	Computer Science, Theory & Methods;Engineering, Industrial;Ergonomics;Materials Science, Textiles	Computer Science;Engineering;Materials Science	1	18	1	18	12	Missing Fields	Department Of Education Of Fujian Province, China [Jas180452/A201812]	Lin, Mc (Corresponding Author), Sanming Univ, Coll Arts & Design, Sanming, Fujian, Peoples R China.			Wos:000839506000097	10.1007/978-3-030-80829-7_103	the social and living style in our society has greatly changed that makes customer requirements complicated and difficult to grasp. this situation causes designers to devote their efforts on considering consumer emotions or preferences in the engineering aspects of design. since kansei engineering is a method for translating customer feelings and impressions into product parameters, it can effect…	Qiu, Gp	Qiu, Gp;Using Kansei Semantic Differential Method And Grey Relational Analysis In The Exploration Of Product Form Image Cognition Representation	174
2022	8	A Biclustering-Based Heterogeneous Customer Requirement Determination Method From Customer Participation In Product Development	Customer Requirement;Biclustering;Bimax Algorithm;Customer Participation;Product Development	Engineering Characteristics;Feature-Selection;E-Commerce;Quality;Qfd;Lead;Generation;Network;Idea	Annals Of Operations Research	Fang, Xh;Zhou, J;Zhao, Hy;Chen, Yz	China Jiliang Univ;Shanghai Univ;Shenzhen Polytech	Peoples R China	Fang, Xinghua;Zhou, Jian;Zhao, Hongya;Chen, Yizeng	Operations Research & Management Science	Operations Research & Management Science	5	46	8	46	49	FEB	National Natural Science Foundation Of China [71801202, 71872110];Zhejiang Provinvcial Natural Science Foundation Of China [Lq18G020005]	Zhou, J (Corresponding Author), Shanghai Univ, Sch Management, Shanghai, Peoples R China.			Wos:000528070000001	10.1007/S10479-020-03607-7	timely identification of heterogeneous customer requirements serves as a vital step for a company to formulate product strategies to meet the diverse and changing needs of its customers. by relaxing the search for global patterns in classical clustering, we propose a biclustering-based method, bihcr, to identify heterogeneous customer requirements from the perspective of local patterns detection.…	Fang, Xh	Fang, Xh;A Biclustering-Based Heterogeneous Customer Requirement Determination Method From Customer Participation In Product Development	245
2022	3	A Conceptual Design Specification Based On User Aesthetic Information Analysis And Product Functional Reasoning	Product Design;User Experience;Design Specification;Aesthetic Design;Functional Design	Consumer-Oriented Technology;Experience;Framework;Principles;Regression;Usability;Rotation;Model	Machines	Hu, Hc;Liu, Y;Guo, X;Fu, C	Shanghai Univ Finance & Econ;Sichuan Univ;Harbin Inst Technol Shenzhen;Cardiff Univ	Wales;Peoples R China	Hu, Huicong;Liu, Ying;Guo, Xin;Fu, Chuan	Engineering, Electrical & Electronic;Engineering, Mechanical	Engineering	7	29	4	29	92	OCT	Shenzhen Research Funding For Advanced Talents [Ha11409043];Sichuan Science And Technology Program [2021Yfh0151]	Guo, X (Corresponding Author), Sichuan Univ, Sch Mech Engn, Chengdu 610065, Peoples R China.			Wos:000875098100001	10.3390/Machines10100868	user satisfaction with a product plays a direct role in the purchasing decisions. with the enrichment of material life and the growth of individual requirements, this satisfaction is derived from the requirement for functionality to aesthetics. conventional product design methods normally focus on achieving the required functions where its design specifications are mainly related to certain funct…	Hu, Hc	Hu, Hc;A Conceptual Design Specification Based On User Aesthetic Information Analysis And Product Functional Reasoning	90
2022	0	A Data-Driven Machine Learning Approach To Creativity And Innovation Techniques Selection In Solution Development	Decision Support System;Creativity;Artificial Intelligence;Design	Management-Techniques;Design;Tools;Adoption;System;Ideas;Smote;Ahp	Knowledge-Based Systems	Botega, Lfd;Da Silva, Jc	Univ Fed Santa Catarina	Brazil	De Carvalho Botega, Luiz Fernando;Da Silva, Jonny Carlos	Computer Science, Artificial Intelligence	Computer Science	4	12	0	12	76	DEC 5	Cnpq (National Council For Scientific And Technological Development)	Botega, Lfd (Corresponding Author), Univ Fed Santa Catarina, Campus Reitor Joao David Ferreira Lima, Br-88040900 Florianopolis, Sc, Brazil.			Wos:001022960600004	10.1016/J.Knosys.2022.109893	the creation and refinement of new ideas is a strategic competence for teams and organization to innovate and prosper. this paper addresses the challenge of finding adequate creativity and innovation techniques (cits) for improving individual or team creativity through the use of machine learning (ml). the process of choosing which cit to use is complex and demanding, especially when taking into …	Botega, Lfd	Botega, Lfd;A Data-Driven Machine Learning Approach To Creativity And Innovation Techniques Selection In Solution Development	332
2022	7	A Data-Driven Multi-Criteria Decision-Making Approach For Assessing New Product Conceptual Designs	Artificial Neural Network;Multi-Criteria Decision Making;New Product Development;Design Evaluation;Automotive Industry	Artificial Neural-Network;Prediction;Model;Preferences;Customer;System	Proceedings Of The Institution Of Mechanical Engineers Part B-Journal Of Engineering Manufacture	Arbabi, H;Vahedi-Nouri, B;Iranmanesh, S;Tavakkoli-Moghaddam, R	Univ Tehran;Univ Sci Educ & Res Network Usern;Res Ctr Org Proc Improvement	Iran	Arbabi, Hamidreza;Vahedi-Nouri, Behdin;Iranmanesh, Seyedhossein;Tavakkoli-Moghaddam, Reza	Engineering, Manufacturing;Engineering, Mechanical	Engineering	8	56	7	56	49	DEC	Missing Fields	Iranmanesh, S (Corresponding Author), Univ Tehran, Sch Ind Engn, Coll Engn, Tehran 1439957131, Iran.			Wos:000681116200001	10.1177/0954405421991418	the surge in competition among companies to acquire a more significant portion of the market as well as respecting customer preferences in high quality and diverse products result in a reduction of product life cycles. accordingly, companies are under enormous pressure to introduce new high quality and diverse products on time. assessing new product designs at the primary phases of new product de…	Arbabi, H	Arbabi, H;A Data-Driven Multi-Criteria Decision-Making Approach For Assessing New Product Conceptual Designs	313
2022	26	A Novel Function-Structure Concept Network Construction And Analysis Method For A Smart Product Design System	Function-Structure Concept Network;Network Analysis;Graph Embedding;Data-Driven Conceptual Design;Innovation Design	Engineering Design;Idea Generation;Technology;Information;Creativity;Innovation;Tool;Ai	Advanced Engineering Informatics	Liu, Qy;Wang, K;Li, Y;Chen, C;Li, Wq	Sichuan Univ;Chengdu Univ Informat Technol	Peoples R China	Liu, Qiyu;Wang, Kai;Li, Yan;Chen, Chen;Li, Wenqiang	Computer Science, Artificial Intelligence;Engineering, Multidisciplinary	Computer Science;Engineering	16	73	27	73	79	JAN	National Key Research And Devel-Opment Program Of China ? [2018Yfb1700702];Network Collaborative Manufacturing And Intelligent Factory? [22Zdyf3366,2019Yfg0397,22Zdzx0051,21Zdyf1900];Key Research And Development Projects Of Sichuan Province	Wang, K (Corresponding Author), Sichuan Univ, Sch Mech Engn, Innovat Method & Creat Design Key Lab Sichuan Prov, Chengdu 610065, Peoples R China.			Wos:000798285200005	10.1016/J.Aei.2021.101502	the rapid growth of data and the requirement of designers to track massive data to obtain design stimuli have posed challenges to conceptual design, thereby promoting the development of data-driven design. concept networks precisely capture design information from a large volume of unstructured and heterogeneous textual data and saliently decrease time and labor cost for designers to read texts, …	Liu, Qy	Liu, Qy;A Novel Function-Structure Concept Network Construction And Analysis Method For A Smart Product Design System	328
2022	11	A Predictive And Generative Design Approach For Three-Dimensional Mesh Shapes Using Target-Embedding Variational Autoencoder	Data-Driven Design;Generative Design;Product Shape Design;Deep Learning Of Design Representation	Missing Fields	Journal Of Mechanical Design	Li, Xg;Xie, C;Sha, Zh	Inst Future Intelligence;Univ Texas Austin	Usa	Li, Xingang;Xie, Charles;Sha, Zhenghui	Engineering, Mechanical	Engineering	6	26	13	26	36	NOV 1	U.S. National Science Foundation (Nsf) Division Of Undergraduate Education (Due) [2207408]	Sha, Zh (Corresponding Author), Univ Texas Austin, Walker Dept Mech Engn, Austin, Tx 78712 Usa.			Wos:000863405500002	10.1115/1.4054906	in this paper, we present a predictive and generative design approach for supporting the conceptual design of product shapes in 3d meshes. we develop a target-embedding variational autoencoder (tevae) neural network architecture, which consists of two modules: (1) a training module with two encoders and one decoder ((ed)-d-2 network) and (2) an application module performing the generative design …	Li, Xg	Li, Xg;A Predictive And Generative Design Approach For Three-Dimensional Mesh Shapes Using Target-Embedding Variational Autoencoder	253
2022	3	A Tool To Facilitate The Cross-Cultural Design Process Using Deep Learning	Cultural Differences;Visualization;Product Design;Image Color Analysis;Deep Learning;Image Recognition;Design Tools;Cross-Cultural;Deep Learning;Design Tool	Missing Fields	Ieee Transactions On Human-Machine Systems	Zhou, Lj;Sun, X;Mu, Gn;Wu, Jy;Zhou, Jp;Wu, Qn;Zhang, Yr;Xi, Yf;Günes, Nd;Song, Sy	Univ Cambridge;Univ Nottingham Ningbo;Univ Technol Eindhoven;Imperial Coll London;Zhejiang Univ	England;Netherlands;Peoples R China	Zhou, Leijing;Sun, Xu;Mu, Guannan;Wu, Jiayi;Zhou, Jiangping;Wu, Qiuning;Zhang, Yaorun;Xi, Yufan;Gunes, N D;Song, Siyang	Computer Science, Artificial Intelligence;Computer Science, Cybernetics	Computer Science	13	55	3	55	68	JUN	Chinese Ergonomics Society Fund Of Chinese Ministry Of Education [202101042006]	Sun, X (Corresponding Author), Univ Nottingham Ningbo, Fac Sci & Engn, Ningbo 315100, Peoples R China;Sun, X (Corresponding Author), Univ Nottingham Ningbo, Nottingham Ningbo China Beacons Excellence Res &, Ningbo 315100, Peoples R China.			Wos:000734078700001	10.1109/Thms.2021.3126699	cross-cultural design requires designers to understand other foreign cultures, selecting suitable cultural elements, and finally incorporate them into product design. traditionally, this process is time-consuming and relies to a significant extent on designers' cultural awareness and design skills. this article proposes a new tool for designers to select and integrate cultural elements in the cro…	Zhou, Lj	Zhou, Lj;A Tool To Facilitate The Cross-Cultural Design Process Using Deep Learning	162
2022	6	Aesthetic Shape Generation System Based On Novelty And Complexity	Aesthetics;Shape Generation;Kansei;Novelty;Complexity	Preference;Optimization;Computation;Orientation;Thinking;Model	Journal Of Engineering Design	Honda, S;Yanagisawa, H;Kato, T	Univ Tokyo;Keio Univ	Japan	Honda, Shimon;Yanagisawa, Hideyoshi;Kato, Takeo	Engineering, Multidisciplinary	Engineering	9	47	6	47	45	DEC 2	Grants-In-Aid For Scientific Research [21H03528] Funding Source: Kaken	Yanagisawa, H (Corresponding Author), Univ Tokyo, Dept Mech Engn, Design Engn Lab, Tokyo 1130033, Japan.			Wos:000897072700001	10.1080/09544828.2022.2155343	increasing the aesthetic quality of a shape is an important objective for enhancing the attractiveness of a product. many studies on shape generation systems are based on the user's emotion as a means of supporting the ideas of product designers. however, most of the proposed systems are unsuitable for extrapolation of shapes because they rely on the subjective evaluation of the user to determine…	Honda, S	Honda, S;Aesthetic Shape Generation System Based On Novelty And Complexity	411
2022	0	Big Data-Driven Product Innovation Design Modeling And System Construction Method	Missing Fields	Missing Fields	Mathematical Problems In Engineering	Xue, Hc;Wu, Dp	Qingdao Inst Technol;Zhengzhou Univ	Peoples R China	Xue, Huicong;Wu, Depei	Engineering, Multidisciplinary;Mathematics, Interdisciplinary Applications	Engineering;Mathematics	4	16	0	16	20	AUG 9	Missing Fields	Wu, Dp (Corresponding Author), Zhengzhou Univ, Sch Comp & Artificial Intelligence, Zhengzhou 450000, Peoples R China.			Wos:000892137000011	10.1155/2022/4358330	in order to improve the image quality of innovative design of manufacturing products, reduce the dependence on experts, increase the amount of research data, and accurately sort and select the best alternatives, this paper proposes the kenpi method, which integrates perceptual engineering and neural style transfer, normalizes the content map through nm model, realizes style transfer, and generate…	Xue, Hc	Xue, Hc;Big Data-Driven Product Innovation Design Modeling And System Construction Method	325
2022	1	Capabilities, Limitations And Challenges Of Style Transfer With Cyclegans: A Study On Automatic Ring Design Generation	Deep Learning;Generative Adversarial Networks;Automatic Design;Image-To-Image Translation;Jewelry Design;Cyclegan	Missing Fields	Machine Learning And Knowledge Extraction, Cd-Make 2022	Pedroso, Tc;Del Ser, J;Díaz-Rodríguez, N	Basque Res & Technol Alliance Brta;Univ Granada;Univ Basque Country;Carnegie Mellon Univ	Usa;Spain	Cabezon Pedroso, Tomas;Del Ser, Javier;Diaz-Rodriguez, Natalia	Computer Science, Artificial Intelligence	Computer Science	0	10	1	10	23	Missing Fields	Mcin/Aei [Ijc2019-039152-I];Esf Investing In Your Future [Ijc2019-039152-I];Google Research Scholar Program;Basque Government Elkartek Program (3Kia Project) [Kk-2020/00049];Research Group Mathmode [T1294-19]	Díaz-Rodríguez, N (Corresponding Author), Univ Granada, Dept Comp Sci & Artificial Intelligence, Andalusian Res Inst Data Sci & Computat Intellige, Citic, Granada, Spain.			Wos:000871733700011	10.1007/978-3-031-14463-9_11	rendering programs have changed the design process completely as they permit to see how the products will look before they are fabricated. however, the rendering process is complicated and takes a significant amount of time, not only in the rendering itself but in the setting of the scene as well. materials, lights and cameras need to be set in order to get the best quality results. nevertheless,…	Pedroso, Tc	Pedroso, Tc;Capabilities, Limitations And Challenges Of Style Transfer With Cyclegans: A Study On Automatic Ring Design Generation	171
2022	5	Classifying Component Function In Product Assemblies With Graph Neural Networks	Data-Driven Design;Functional Reasoning;Machine Learning	Design;Knowledge	Journal Of Mechanical Design	Ferrero, V;Dupont, B;Hassani, K;Grandi, D	Autodesk Inc;Oregon State Univ	Usa	Ferrero, Vincenzo;Dupont, Bryony;Hassani, Kaveh;Grandi, Daniele	Engineering, Mechanical	Engineering	2	30	6	30	84	FEB 1	National Science Foundation [Cmmi-1826469]	Ferrero, V (Corresponding Author), Oregon State Univ, Design Engn Lab, Corvallis, Or 97331 Usa.			Wos:000741659500006	10.1115/1.4052720	function is defined as the ensemble of tasks that enable the product to complete the designed purpose. functional tools, such as functional modeling, offer decision guidance in the early phase of product design, where explicit design decisions are yet to be made. function-based design data is often sparse and grounded in individual interpretation. as such, function-based design tools can benefit …	Ferrero, V	Ferrero, V;Classifying Component Function In Product Assemblies With Graph Neural Networks	334
2022	3	Conceptual Design Of Intelligent Manufacturing Equipment Based On A Multi-Source Heterogeneous Requirement Mapping Method	Product Design;Collaborative Design;Intelligent Manufacturing	Missing Fields	Ifac Papersonline	Wu, B;Zhao, W;Hu, Hc;Liu, Y;Lv, Jj	Sichuan Univ;Tianfu New Area Power Supply Co;Harbin Inst Technol Shenzhen;Cardiff Univ	Wales;Peoples R China	Wu, Bo;Zhao, Wu;Hu, Huicong;Liu, Ying;Lv, Junjie	Automation & Control Systems	Automation & Control Systems	4	22	4	22	19	Missing Fields	National Key Research And Development Project Of China [2018Yfb1700700];Sichuan Science And Technology Program [2021Yfh0151]	Zhao, W (Corresponding Author), Sichuan Univ, Sch Mech Engn, Chengdu 610065, Peoples R China;Zhao, W (Corresponding Author), Sichuan Univ, Innovat Method & Creat Design Key Lab Sichuan Pro, Chengdu 610065, Peoples R China.			Wos:000802773300032	10.1016/J.Ifacol.2022.04.239	intelligent manufacturing equipment constitutes important prerequisite and foundation for processing and manufacturing. in its conceptual design process, functional determination based on customer needs (cas), intelligence demands (ids) and manufacture constraints (mcs) is the prerequisite and basis for subsequent design work. as these various requirement information becomes more complex and mixe…	Wu, B	Wu, B;Conceptual Design Of Intelligent Manufacturing Equipment Based On A Multi-Source Heterogeneous Requirement Mapping Method	111
2022	13	Crowdsourcing Ideas Using Product Prototypes: The Joint Effect Of Prototype Enhancement And The Product Design Goal On Idea Novelty	Creative Cognition Theory;New Product Development;Product Prototype;Level Of Enhancement;Design Goal	Dual Pathway;Cognitive Stimulation;Creativity;Generation;Activation;Context;Originality;Thinking;Quality;Model	Management Science	Althuizen, N;Chen, B	Sungkyunkwan Univ;Univ Montpellier	South Korea;France	Althuizen, Niek;Chen, Bo	Management;Operations Research & Management Science	Business & Economics;Operations Research & Management Science	13	73	16	73	56	APR	Missing Fields	Chen, B (Corresponding Author), Sungkyunkwan Univ, Seoul 0306, South Korea.			Wos:000752364900001	10.1287/Mnsc.2021.4030	when soliciting novel product ideas from the "crowd," companies may opt to show a prototype in order to steer the generation of ideas in the desired direction. on the one hand, the more features the prototype incorporates, the larger the potential for activating relevant knowledge in memory that may serve as a basis for generating novel ideas. on the other hand, it increases the risk of fixation …	Althuizen, N	Althuizen, N;Crowdsourcing Ideas Using Product Prototypes: The Joint Effect Of Prototype Enhancement And The Product Design Goal On Idea Novelty	172
2022	4	Data-Driven Affective Product Design Using Complete Three-Dimensional Surface Data	Affective Product Form Design;Complete Three-Dimensional Surface Data;Emotion Recognition;Spherical Harmonic;Conditional Variational Auto-Encoder	Kansei Engineering System;Representation	Journal Of Intelligent & Fuzzy Systems	Wang, Z;Liu, Wd;Yang, Ml	Nanchang Univ	Peoples R China	Wang, Zeng;Liu, Weidong;Yang, Minglang	Computer Science, Artificial Intelligence	Computer Science	6	55	4	55	34	Missing Fields	National Natural Science Foundation Of China [71661023];Jiangxi Province Humanities And Social Science Research Projects Of Universities [Ys19234]	Liu, Wd (Corresponding Author), Nanchang Univ, Adv Mfg Sch, Nanchang, Jiangxi, Peoples R China.			Wos:000790690300045	10.3233/Jifs-211947	as the main part of design display and evaluation, product three-dimensional (3d) form is the core object in affective product design. however, previous research has not yet addressed the development of technical models and method involving complete 3d surface data, and thus cannot guarantee the quality of affective product design. by using the techniques of triangular mesh model, spherical harmo…	Wang, Z	Wang, Z;Data-Driven Affective Product Design Using Complete Three-Dimensional Surface Data	310
2022	0	Data-Driven And Real-Time Prediction Models For Highly Iterative Product Development Processes	Data-Driven;Prediction Models;Design Automation;Simulation-Driven Design;Cad/Cae	Engineering Design;Shape Design;Automation;Tasks	Transdisciplinarity And The Future Of Engineering	Arjomandi Rad, M;Raudberget, D;Stolt, R	Jonkoping Univ	Sweden	Arjomandi Rad, Mohammad;Raudberget, Dag;Stolt, Roland	Computer Science, Interdisciplinary Applications;Engineering, Multidisciplinary;Engineering, Industrial	Computer Science;Engineering	1	1	0	1	31	Missing Fields	Missing Fields	Arjomandi Rad, M (Corresponding Author), Jonkoping Univ, Sch Engn, Dept Product Dev, Jonkoping, Sweden.			Wos:001175836300046	10.3233/Atde220676	some high-level technical products are associated with transdisciplinary simulation-driven design processes. therefore, their design process involves many stakeholders and is prone to frequent changes, leading to a highly iterative process with a long lead time. despite the decades of statistical approximations and metamodeling techniques on prediction models, companies are still striving to achi…	Arjomandi Rad, M	Arjomandi Rad, M;Data-Driven And Real-Time Prediction Models For Highly Iterative Product Development Processes	9
2022	8	Data-Driven Engineering Design: A Systematic Review Using Scientometric Approach	Data-Driven Design;Engineering Design;Product Development;Big Data Analytics;Bibliographic Analysis;Network Analysis	Product-Service Systems;Data Mining Approach;Big Data;Affective Responses;Digital Twin;Knowledge;Framework;Features;Technology;Prediction	Advanced Engineering Informatics	Vlah, D;Kastrin, A;Povh, J;Vukasinovic, N	Univ Ljubljana	Slovenia	Vlah, Daria;Kastrin, Andrej;Povh, Janez;Vukasinovic, Nikola	Computer Science, Artificial Intelligence;Engineering, Multidisciplinary	Computer Science;Engineering	10	65	8	65	189	OCT	Slovenian Research Agency;[P2-0425];[J5-2552]	Vlah, D (Corresponding Author), Univ Ljubljana, Fac Mech Engn, Lecad Lab, Askerceva 6, Ljubljana 1000, Slovenia.			Wos:000877545400006	10.1016/J.Aei.2022.101774	in the last two decades, data regarding engineering design and product development has increased rapidly. big data exploration and mining offer numerous opportunities for engineering design; however, owing to the multitude of data sources and formats coupled with the high complexity of the design process, these techniques are yet to be utilised to the best of their full potential. in this study, …	Vlah, D	Vlah, D;Data-Driven Engineering Design: A Systematic Review Using Scientometric Approach	294
2022	22	Data-Driven Generative Design For Mass Customization: A Case Study	Design For Additive Manufacturing;Generative Design;Data-Driven Design;Mass Customization;Design Automation;Product Design	Missing Fields	Advanced Engineering Informatics	Jiang, Zmj;Wen, H;Han, F;Tang, Yl;Xiong, Y	Monash Univ;Southern Univ Sci & Technol;Guilin Univ Elect Technol	Australia;Peoples R China	Jiang, Zhoumingju;Wen, Hui;Han, Fred;Tang, Yunlong;Xiong, Yi	Computer Science, Artificial Intelligence;Engineering, Multidisciplinary	Computer Science;Engineering	19	95	24	95	53	OCT	National Natural Science Foundation Of China;Guangdong Basic And Applied Basic Research Foundation;[52105261];[2022A1515010316]	Xiong, Y (Corresponding Author), Southern Univ Sci & Technol, Sch Syst Design & Intelligent Mfg, Shenzhen 518055, Peoples R China;Tang, Yl (Corresponding Author), Monash Univ, Mech & Aerosp Engn Dept, Melbourne 3168, Australia.			Wos:000886982200001	10.1016/J.Aei.2022.101786	generative design provides a promising algorithmic solution for mass customization of products, improving both product variety and design efficiency. however, the current designer-driven generative design formulates the automated program in a manual manner and has insufficient ability to satisfy the diverse needs of individuals. in this work, we propose a data-driven generative design framework b…	Jiang, Zmj	Jiang, Zmj;Data-Driven Generative Design For Mass Customization: A Case Study	1
2022	10	Data-Driven Haptic Texture Modeling And Rendering Based On Deep Spatio-Temporal Networks	Haptic Interfaces;Rendering (Computer Graphics);Force;Data Collection;Convolution;Vibrations;Interpolation;Data-Driven Approach;Attention-Aware 1D Cnn;Attention-Aware Encoder-Decoder Network;Texture Modeling And Rendering	Missing Fields	Ieee Transactions On Haptics	Joolee, Jb;Jeon, S	Kyung Hee Univ	South Korea	Joolee, Joolekha Bibi;Jeon, Seokhee	Computer Science, Cybernetics	Computer Science	3	15	12	15	19	JAN 1	National Research Foundation Of Korea Through Basic Research Project Program [Nrf-2020R1F1A1077271]	Jeon, S (Corresponding Author), Kyung Hee Univ, Comp Sci & Engn Dept, Yongin 17104, South Korea.			Wos:000770602400012	10.1109/Toh.2021.3137936	data-driven approaches are commonly used to model and render haptic textures for rigid stylus-based interaction. current state-of-the-art data-driven methodologies synthesize acceleration signals through the interpolation of samples with different input parameters based on neural networks or parametric spectral estimation methods. in this paper, we see the potential of emerging deep learning meth…	Joolee, Jb	Joolee, Jb;Data-Driven Haptic Texture Modeling And Rendering Based On Deep Spatio-Temporal Networks	383
2022	1	Data-Driven Image Interaction-Based Software Infrastructure For Graphic Design Research And Implementation	Missing Fields	Missing Fields	Scientific Programming	Chu, Ff;Li, Wt	Jimei Univ;Xiamen Univ	Peoples R China	Chu, Fufeng;Li, Wentao	Computer Science, Software Engineering	Computer Science	6	10	1	10	25	JUN 2	Project Of Jimei University University Accounting Fund Project "Traditional Creative Product Design Research Based On Design Thinking" [Q202005];Fujian Provincial Social Science Fund Youth Project "Design Strategy Of Twenty-Four Solar Terms Cultural And Creative Products Based On Nonitive Cultural Heritage Innovation" [Fj2020C058]	Li, Wt (Corresponding Author), Jimei Univ, Coll Art & Design, Xiamen 361021, Fujian, Peoples R China.			Wos:000811048500001	10.1155/2022/6934740	this article constructs and studies a graphic design software model based on data-driven image interactions. the semantic information of image interaction is integrated into the framework of the augmented reality label placement algorithm. a new feature map, guidance map, is proposed to combine image saliency information with semantic information in the task scenario, accurately describing the im…	Chu, Ff	Chu, Ff;Data-Driven Image Interaction-Based Software Infrastructure For Graphic Design Research And Implementation	312
2022	8	Data-Driven Restoration Of Digital Archaeological Pottery With Point Cloud Analysis	Cultural Heritage Restoration;Shape Completion;Point Cloud Analysis;Shape Analysis	Symmetry Detection;Completion;Shape	International Journal Of Computer Vision	Sipiran, I;Mendoza, A;Apaza, A;Lopez, C	Univ Nacl San Agustin;Univ Chile;Univ Ingn & Tecnol	Chile;Peru	Sipiran, Ivan;Mendoza, Alexis;Apaza, Alexander;Lopez, Cristian	Computer Science, Artificial Intelligence	Computer Science	6	26	8	26	49	SEP	Anid Chile-Research Initiation Program [11220211];Proyecto De Mejoramiento Y Ampliacion De Los Servicios Del Sistema Nacional De Ciencia Tecnologia E Innovacion Tecnologica(Banco Mundial, Concytec-Peru) [062-2018-Fondecyt-Bm-Iadt-Av];Josefina Ramos De Cox Museum	Sipiran, I (Corresponding Author), Univ Chile, Dept Comp Sci, Santiago, Chile.			Wos:000819324500001	10.1007/S11263-022-01637-1	the josefina ramos de cox museum in lima, peru, decided to digitize hundreds of archaeological pieces from pre-colombian cultures to support further research and create virtual educational environments. however, the 3d scanning procedure led to imperfections in the objects' surface, mainly due to the difficulty of manipulating the fragile objects during the acquisition. the problem was that many …	Sipiran, I	Sipiran, I;Data-Driven Restoration Of Digital Archaeological Pottery With Point Cloud Analysis	12
2022	86	Deep Generative Models In Engineering Design: A Review	Artificial Intelligence;Data-Driven Design;Design Automation;Design Representation;Generative Design;Machine Learning;Product Design	Topology Optimization;Inverse Design;Networks;Fluids;3D	Journal Of Mechanical Design	Regenwetter, L;Nobari, Ah;Ahmed, F	Mit	Usa	Regenwetter, Lyle;Nobari, Amin Heyrani;Ahmed, Faez	Engineering, Mechanical	Engineering	37	186	88	186	175	JUL 1	Missing Fields	Regenwetter, L (Corresponding Author), Mit, Dept Mech Engn, Cambridge, Ma 02139 Usa.			Wos:000806410900005	10.1115/1.4053859	automated design synthesis has the potential to revolutionize the modern engineering design process and improve access to highly optimized and customized products across countless industries. successfully adapting generative machine learning to design engineering may enable such automated design synthesis and is a research subject of great importance. we present a review and analysis of deep gene…	Regenwetter, L	Regenwetter, L;Deep Generative Models In Engineering Design: A Review	30
2022	28	Digital Human Modeling: A Review And Reappraisal Of Origins, Present, And Expected Future Methods For Representing Humans Computationally	Missing Fields	Computer-Aided Ergonomics;Walking Pattern Generation;Human Motion;Anthropometric Data;Biped Robot;Design;Gait;Optimization;Simulation;Knee	International Journal Of Human-Computer Interaction	Demirel, Ho;Ahmed, S;Duffy, Vg	Oregon State Univ;Purdue Univ	Usa	Demirel, H Onan;Ahmed, Salman;Duffy, Vincent G	Computer Science, Cybernetics;Ergonomics	Computer Science;Engineering	4	61	29	61	391	JUN 15	Missing Fields	Demirel, Ho (Corresponding Author), Oregon State Univ, Sch Mech Ind & Mfg Engn, Corvallis, Or 97331 Usa.			Wos:000710827700001	10.1080/10447318.2021.1976507	the effective use of computational modeling and simulation tools early in the design process is arguably becoming a gold standard for modern product development. compared to many mechanistic computational design approaches, modeling and simulating humans, due to their inherent complexities of physiological and cognitive attributes, provides one of the most challenging undertakings. with the rapid…	Demirel, Ho	Demirel, Ho;Digital Human Modeling: A Review And Reappraisal Of Origins, Present, And Expected Future Methods For Representing Humans Computationally	233
2022	18	Diversifying Tire-Defect Image Generation Based On Generative Adversarial Network	Tires;Generative Adversarial Networks;Feature Extraction;Deep Learning;Shape;Data Models;Training;Data Augmentation;Feature Decoupling;Generative Adversarial Network (Gan);Generative Control;Tire-Defect Detection	Missing Fields	Ieee Transactions On Instrumentation And Measurement	Zhang, Yl;Wang, Yl;Jiang, Zq;Liao, Fg;Zheng, L;Tan, Dz;Chen, Js;Lu, Jg	Zhejiang Univ;Zhejiang Lab;Zhongce Rubber Grp Co Ltd	Peoples R China	Zhang, Yulong;Wang, Yilin;Jiang, Zhiqiang;Liao, Fagen;Zheng, Li;Tan, Dongzeng;Chen, Jinshui;Lu, Jiangang	Engineering, Electrical & Electronic;Instruments & Instrumentation	Engineering;Instruments & Instrumentation	8	36	20	36	41	Missing Fields	National Key Research And Development Plan Of China [2019Yfc1907305];Fundamental Research Funds For The Central Universities [Zhejiang University New Generation Industrial Control System (Ngics) Platform] [Zjungics2021010];Major Scientific Project Of Zhejiang Laboratory [2020Mc0Ae01];Zhejiang University Robotics Institute (Yuyao) Project [K12001]	Chen, Js (Corresponding Author), Zhejiang Univ, State Key Lab Ind Control Technol, Coll Control Sci & Engn, Hangzhou 310027, Peoples R China.			Wos:000777332200011	10.1109/Tim.2022.3160542	with the development of data-driven models, deep learning has been increasingly applied in the field of defect detection. however, the performance of deep learning models is greatly restricted by costly labeling and sample scarcity. one of the best approaches to solve the data imbalance problem is increasing the quantity and diversity of defect samples. meanwhile, the current models based on gene…	Zhang, Yl	Zhang, Yl;Diversifying Tire-Defect Image Generation Based On Generative Adversarial Network	57
2022	10	Dynamic Modeling For Product Family Evolution Combined With Artificial Neural Network Based Forecasting Model: A Study Of Iphone Evolution	Product Family Evolution;Dynamic Model;Neural Network;Forecasting Model;Grey Relational Analysis;Fuzzy Analytical Hierarchy Process	Grey Relational Analysis;Cutting Parameters;Prediction;Design;Core	Technological Forecasting And Social Change	Biswas, S;Ali, I;Chakrabortty, Rk;Turan, Hh;Elsawah, S;Ryan, Mj	Univ New South Wales	Australia	Biswas, Sumana;Ali, Ismail;Chakrabortty, Ripon K;Turan, Hasan Huseyin;Elsawah, Sondoss;Ryan, Michael J	Business;Regional & Urban Planning	Business & Economics;Public Administration	4	36	11	36	91	MAY	Missing Fields	Biswas, S (Corresponding Author), Univ New South Wales, Capabil Syst Ctr, Canberra, Act, Australia.			Wos:000778411300002	10.1016/J.Techfore.2022.121549	products continuously evolve over time. realizing the pattern of product family evolution along with proper estimation of features for future products has been regarded as a critical issue for business success. focusing on this issue, a dynamic model for product family evolution combined with forecasting is proposed in this research work. the proposed model considers the influence of market deman…	Biswas, S	Biswas, S;Dynamic Modeling For Product Family Evolution Combined With Artificial Neural Network Based Forecasting Model: A Study Of Iphone Evolution	235
2022	1	Evaluation Model Of Product Shape Design Scheme Based On Fuzzy Genetic Algorithm Mining Spatial Association Rules	Missing Fields	Missing Fields	Mathematical Problems In Engineering	Wu, J	Sch Anyang Inst Technol	Peoples R China	Wu, Jie	Engineering, Multidisciplinary;Mathematics, Interdisciplinary Applications	Engineering;Mathematics	2	19	1	19	28	MAR 18	Missing Fields	Wu, J (Corresponding Author), Sch Anyang Inst Technol, Anyang 45500, Henan, Peoples R China.			Wos:000778449300001	10.1155/2022/2888472	put forward a kind of association rules mining method based on fuzzy genetic algorithm, this approach by building a mining model, the association rules and fuzzy genetic algorithm fuses in together, and then given to the fitness function of the mining space, and uses threshold to limit the fuzzy genetic algorithm will cross distribution and compile the fitness function, the improved method excava…	Wu, J	Wu, J;Evaluation Model Of Product Shape Design Scheme Based On Fuzzy Genetic Algorithm Mining Spatial Association Rules	69
2022	4	Fame: 3D Shape Generation Via Functionality-Aware Model Evolution	Shape;Three-Dimensional Displays;Tools;Solid Modeling;Computational Modeling;Sociology;Statistics;Cross-Category Hybrids;Functionality-Aware Shape Modeling;Functionality Partial Matching;Set Evolution	Missing Fields	Ieee Transactions On Visualization And Computer Graphics	Guan, Yr;Liu, H;Liu, K;Yin, Kx;Hu, Rz;Van Kaick, O;Zhang, Y;Yumer, E;Carr, N;Mech, R;Zhang, H	Simon Fraser Univ;Shenzhen Univ;Carleton Univ;Elect Arts;Nvidia;Uber Atg;Nanjing Univ;Adobe	Usa;Canada;Peoples R China	Guan, Yanran;Liu, Han;Liu, Kun;Yin, Kangxue;Hu, Ruizhen;Van Kaick, Oliver;Zhang, Yan;Yumer, Ersin;Carr, Nathan;Mech, Radomir;Zhang, Hao	Computer Science, Software Engineering	Computer Science	1	14	6	14	34	APR 1	Nserc Canada [611370, 611649, 2015-05407];Nsfc [61872250, 62032011]	Hu, Rz (Corresponding Author), Shenzhen Univ, Coll Comp Sci & Software Engn, Shenzhen 518060, Peoples R China.			Wos:000761227900005	10.1109/Tvcg.2020.3029759	we introduce a modeling tool which can evolve a set of 3d objects in a functionality-aware manner. our goal is for the evolution to generate large and diverse sets of plausible 3d objects for data augmentation, constrained modeling, as well as open-ended exploration to possibly inspire new designs. starting with an initial population of 3d objects belonging to one or more functional categories, w…	Guan, Yr	Guan, Yr;Fame: 3D Shape Generation Via Functionality-Aware Model Evolution	36
2022	13	Generation And Evaluation Of Product Concepts By Integrating Extended Axiomatic Design, Quality Function Deployment And Design Structure Matrix	Product Design;Quality Function Deployment;Concept Generation;Axiomatic Design;Decision Making	Service;Rehabilitation;Requirements;Innovation;System	Advanced Engineering Informatics	Fazeli, Hr;Peng, Qj	Univ Manitoba	Canada	Fazeli, Hamid Reza;Peng, Qingjin	Computer Science, Artificial Intelligence;Engineering, Multidisciplinary	Computer Science;Engineering	32	128	16	128	79	OCT	Natural Sciences And Engineering Research Council (Nserc) Of Canada, University Of Manitoba Graduate Fellowship (Umgf);University Of Manitoba	Peng, Qj (Corresponding Author), Univ Manitoba, Dept Mech Engn, Winnipeg, Mb R3T 5V6, Canada.			Wos:000860476200001	10.1016/J.Aei.2022.101716	existing product concept generation and evaluation methods are mainly based on designers' experience to determine design schemes in the process of product development, which is time-consuming and ineffective. this paper proposes an approach to generate and evaluate design concepts by integrating the extended axiomatic design, quality function deployment and design structure matrix. different desi…	Fazeli, Hr	Fazeli, Hr;Generation And Evaluation Of Product Concepts By Integrating Extended Axiomatic Design, Quality Function Deployment And Design Structure Matrix	98
2022	2	Hybrid Data-Driven Feature Extraction-Enabled Surface Modeling For Metal Additive Manufacturing	Additive Manufacturing;Hybrid Feature Extraction;Machine Learning;Robust Convolutional Autoencoder;Surface Modeling	Mechanical-Properties;Stainless-Steel;Process Parameters;Laser;Deposition;Microstructure;Optimization;Roughness;Porosity;Deep	International Journal Of Advanced Manufacturing Technology	Shi, Zy;Mandal, S;Harimkar, S;Liu, Cn	Oklahoma State Univ	Usa	Shi, Zhangyue;Mandal, Soumya;Harimkar, Sandip;Liu, Chenang	Automation & Control Systems;Engineering, Manufacturing	Automation & Control Systems;Engineering	2	18	3	18	68	AUG	Missing Fields	Liu, Cn (Corresponding Author), Oklahoma State Univ, Sch Ind Engn & Management, Stillwater, Ok 74078 Usa.			Wos:000824941100001	10.1007/S00170-022-09608-Z	metal additive manufacturing (am) has become popular in a large variety of applications due to its excellent capabilities of handling complex geometries and novel materials. however, due to its process complexity, layer-wise surface quality issue is still one of the critical concerns to further broaden adoption of metal am, because of the impact on products' property and functionality. the existi…	Shi, Zy	Shi, Zy;Hybrid Data-Driven Feature Extraction-Enabled Surface Modeling For Metal Additive Manufacturing	255
2022	1	Hycastle: A Hybrid Classification System Based On Typicality, Labels And Entropy	Machine Learning;Hybrid Models;Multi-Class Classification;Supervised Classification;Clustering	Logistic-Regression;Decision Tree;Algorithm;Prediction;Models;Noise	Knowledge-Based Systems	Veneri, Md;Cavuoti, S;Abbruzzese, R;Brescia, M;Sperlì, G;Moscato, V;Longo, G	Univ Naples Federico Ii;Eustema Spa;Univ Salerno;Infn Napoli;Inaf	Italy	Veneri, Michele Delli;Cavuoti, Stefano;Abbruzzese, Roberto;Brescia, Massimo;Sperli, Giancarlo;Moscato, Vincenzo;Longo, Giuseppe	Computer Science, Artificial Intelligence	Computer Science	0	6	1	6	55	MAY 23	Agreement Asi/Inaf, Euclid Esa Mission -Phase D;Inaf Prin-Ska [1.05.01.88.04];Horizon 2020 Eu Program Through The Marie Sklodowskacurie Grant [721463];Eustema Group;Ffabr 2017 (Fondo Di Finanziamento Per Le Attivita Base Di Ricerca)	Veneri, Md (Corresponding Author), Univ Naples Federico Ii, Dept Informat Technol & Elect Engn Dieti, Via Claudio 21, I-80125 Naples, Italy.			Wos:000835835500010	10.1016/J.Knosys.2022.108566	traditional supervised classification models aim to approximate the functional mapping between instance attributes and their class labels. these models, however, do not consider the interdependence between instances and global characteristics of data and thus often they lead to poor classification results. in this work, we present a novel hybrid classification model - named hycastle - designed to…	Veneri, Md	Veneri, Md;Hycastle: A Hybrid Classification System Based On Typicality, Labels And Entropy	56
2022	25	Implications Of Data-Driven Product Design: From Information Age Towards Intelligence Age	Data-Driven Design;Product Design And Development;Digital Transformation;Computer Intelligence;Cognitive Computing	Service Systems;Mass Personalization;Cognitive Design;Platform Design;Family Design;Knowledge;Smart;Requirements;Framework;Future	Advanced Engineering Informatics	Wang, Zx;Zheng, P;Li, Xy;Chen, Ch	Donghua Univ;Nanyang Technol Univ;Hong Kong Polytech Univ;Beihang Univ	Peoples R China;Singapore	Wang, Zuoxu;Zheng, Pai;Li, Xinyu;Chen, Chun-Hsien	Computer Science, Artificial Intelligence;Engineering, Multidisciplinary	Computer Science;Engineering	32	144	26	144	207	OCT	Na-Tional Natural Research Foundation Of China;Jiangsu Provincial Policy Guidance Program (Hong Kong/Macau/Taiwan Science And Technology Cooperation);[52005424];[Bz2020049]	Zheng, P (Corresponding Author), Hong Kong Polytech Univ, Dept Ind & Syst Engn, Hong Kong, Peoples R China.			Wos:000886982200003	10.1016/J.Aei.2022.101793	data-driven design (d3), a new design paradigm benefited from advanced data analytics and computational intelligence, has gradually promoted the research of data-driven product design (ddpd) ever since 2000 s. in today's intelligence age, some theoretical and practical studies have tried to achieve the advanced intelligence capabilities in ddpd. however, to the authors' best knowledge, there is s…	Wang, Zx	Wang, Zx;Implications Of Data-Driven Product Design: From Information Age Towards Intelligence Age	276
2022	0	Impression-Based Automatic Pattern Generation For Product Design Support	Automated Design;Pattern;Impression;Design Support	Missing Fields	2022 Joint 12Th International Conference On Soft Computing And Intelligent Systems And 23Rd International Symposium On Advanced Intelligent Systems (Scis&Isis)	Ota, R;Kinoshita, Y;Go, K	Univ Yamanashi	Japan	Ota, Ryunosuke;Kinoshita, Yuichiro;Go, Kentaro	Automation & Control Systems;Computer Science, Artificial Intelligence;Robotics	Automation & Control Systems;Computer Science;Robotics	0	1	0	1	9	Missing Fields	Missing Fields	Ota, R (Corresponding Author), Univ Yamanashi, Dept Comp Sci & Engn, Kofu, Yamanashi, Japan.			Wos:000932791900127	10.1109/Scisisis55246.2022.10002034	this research proposed a method for automatically creating patterns that match the impression desired by users in product design support. an impression rating experiment clarified the relationship between pattern physical aspects and impressions. impression evaluation models that estimate the impression of patterns are implemented by training convolutional neural networks using experimental score…	Ota, R	Ota, R;Impression-Based Automatic Pattern Generation For Product Design Support	195
2022	38	Kansei Engineering For New Energy Vehicle Exterior Design: An Internet Big Data Mining Approach	Kansei Engineering;Automobile Exterior;Text Mining;Structural Equation Model;Deep Learning	Entity Recognition;Product-Design;Reviews;Optimization;Experience;Analytics	Computers & Industrial Engineering	Lai, Xj;Zhang, S;Mao, N;Liu, Jj;Chen, Qx	Guangdong Univ Technol	Peoples R China	Lai, Xinjun;Zhang, Sheng;Mao, Ning;Liu, Jianjun;Chen, Qingxin	Computer Science, Interdisciplinary Applications;Engineering, Industrial	Computer Science;Engineering	42	263	39	263	59	MAR	National Natural Science Foundation Of Guangdong Province [2021A1515012015, 2019A1515012158];National Natural Science Foundation Of China [71601052, 51975129];Hundred Young Talent Project Of The Guangdong University Of Technology [220413637];High-Level University Development For The Guangdong University Of Technology [262511006]	Liu, Jj (Corresponding Author), Guangdong Univ Technol, Sch Electromech Engn, State Key Lab Precis Elect Mfg Technol & Equipmen, Guangdong Cim Prov Key Lab, Guangzhou, Peoples R China.			Wos:000746998000005	10.1016/J.Cie.2021.107913	new energy vehicles (nevs) such as electronic cars represent a major trend in the automobile industry, where most their exterior designs still follow those of convention fuelled vehicles (fvs). it is important to investigate whether nev users have unique requirements that differ from those of traditional users. kansei engineering is a practical tool for perceptual demand analysis. however, the co…	Lai, Xj	Lai, Xj;Kansei Engineering For New Energy Vehicle Exterior Design: An Internet Big Data Mining Approach	374
2022	35	Knowledge Graph Construction For Product Designs From Large Cad Model Repositories	Digital Manufacturing;3D Shape Search;3D Recommendation;Deep Learning	Community Detection;Networks;Representation;Information;Generation;Centrality	Advanced Engineering Informatics	Bharadwaj, Ag;Starly, B	North Carolina State Univ	Usa	Bharadwaj, Akshay G;Starly, Binil	Computer Science, Artificial Intelligence;Engineering, Multidisciplinary	Computer Science;Engineering	30	135	36	135	102	AUG	Nsf [1937043];Office Of The Director;Office Of Integrative Activities [1937043] Funding Source: National Science Foundation	Starly, B (Corresponding Author), North Carolina State Univ, Dept Ind & Syst Engn, Raleigh, Nc 27695 Usa.			Wos:000825367100005	10.1016/J.Aei.2022.101680	product design based knowledge graphs (kg) aid the representation of product assemblies through heterogeneous relationships that link entities obtained from multiple structured and unstructured sources. this study describes an approach to constructing a multi-relational and multi-hierarchical knowledge graph that extracts information contained within the 3d product model data to construct assembl…	Bharadwaj, Ag	Bharadwaj, Ag;Knowledge Graph Construction For Product Designs From Large Cad Model Repositories	427
2022	3	Learning Modified Indicator Functions For Surface Reconstruction	Surface Reconstruction;Un-Oriented Point Clouds;Gauss Lemma;Deep Learning;China	Missing Fields	Computers & Graphics-Uk	Xiao, D;Lin, Sy;Shi, Zq;Wang, B	Yanqi Lake Beijing Inst Math Sci & Applicat;Beijing Natl Res Ctr Informat Sci & Technol;Tsinghua Univ	Peoples R China	Xiao, Dong;Lin, Siyou;Shi, Zuoqiang;Wang, Bin	Computer Science, Software Engineering	Computer Science	4	16	3	16	38	FEB	Nsfc [61772301, 12071244]	Wang, B (Corresponding Author), Tsinghua Univ, Sch Software, Beijing, Peoples R China;Shi, Zq (Corresponding Author), Tsinghua Univ, Dept Math Sci, Beijing, Peoples R China.			Wos:000779061900005	10.1016/J.Cag.2021.10.017	surface reconstruction is a fundamental problem in 3d graphics. in this paper, we propose a learning based approach for implicit surface reconstruction from raw point clouds without normals. our method is inspired by gauss lemma in potential energy theory, which gives an explicit integral formula for the indicator functions. we design a novel deep neural network to perform surface integral and le…	Xiao, D	Xiao, D;Learning Modified Indicator Functions For Surface Reconstruction	38
2022	0	Learning The Part Shape And Part Quality Generation Capabilities Of Machining And Finishing Processes Using A Neural Network Model	Manufacturing Process Capability;Data-Driven;Convolutional Neural Network	Selection;Manufacturability;Future	Proceedings Of Asme 2022 International Design Engineering Technical Conferences And Computers And Information In Engineering Conference, Idetc-Cie2022, Vol 2	Zhao, Cx;Melkote, Sn	Georgia Inst Technol	Usa	Zhao, Changxuan;Melkote, Shreyes N	Computer Science, Interdisciplinary Applications;Engineering, Manufacturing	Computer Science;Engineering	0	0	0	0	36	Missing Fields	Nist [70Nanb19H067, 60Nanb20D205]	Zhao, Cx (Corresponding Author), Georgia Inst Technol, George W Woodruff Sch Mech Engn, Atlanta, Ga 30332 Usa.			Wos:001219208300010	Missing Fields	automatically acquiring knowledge of manufacturing process capabilities from existing data is essential for automated process selection in digital and cyber manufacturing. in this work, we present a neural network model to automatically learn the capabilities of discrete manufacturing processes such as machining and finishing from design and manufacturing data. concatenating a 3d convolutional ne…	Zhao, Cx	Zhao, Cx;Learning The Part Shape And Part Quality Generation Capabilities Of Machining And Finishing Processes Using A Neural Network Model	19
2022	11	Letting Logos Speak: Leveraging Multiview Representation Learning For Data-Driven Branding And Logo Design	Logos;Branding;Machine Learning;Multiview Learning;Representation Learning;Image Processing;Bayesian Estimation	Product;Color;Perceptions;Impact	Marketing Science	Dew, R;Ansari, A;Toubia, O	Columbia Univ;Univ Penn	Usa	Dew, Ryan;Ansari, Asim;Toubia, Olivier	Business	Business & Economics	18	138	19	138	45	MAR-APR	Wharton Behavioral Lab;Analytics At Wharton;Informs Society For Marketing Science Doctoral Dissertation Proposal Competition;American Statistical Association'S Section On Statistics In Marketing'S Doctoral Dissertation Award	Dew, R (Corresponding Author), Univ Penn, Wharton Sch, Philadelphia, Pa 19104 Usa.			Wos:000737455400001	10.1287/Mksc.2021.1326	logos serve a fundamental role as the visual figureheads of brands. yet, because of the difficulty of using unstructured image data, prior research on logo design has largely been limited to nonquantitative studies. in this work, we explore the interplay between logo design and brand identity creation from a data-driven perspective. we develop both a novel logo feature extraction algorithm that u…	Dew, R	Dew, R;Letting Logos Speak: Leveraging Multiview Representation Learning For Data-Driven Branding And Logo Design	320
2022	14	Leveraging End-User Data For Enhanced Design Concept Evaluation: A Multimodal Deep Regression Model	Design Automation;New Product Development;Design Evaluation;Image Processing;Natural Language Processing;Deep Regression	Group Decision-Making;Concept Selection;Hybrid Approach;Fuzzy;Intelligence;Performance;Network;Ahp;Alternatives;Methodology	Journal Of Mechanical Design	Yuan, Cx;Marion, T;Moghaddam, M	Northeastern Univ	Usa	Yuan, Chenxi;Marion, Tucker;Moghaddam, Mohsen	Engineering, Mechanical	Engineering	12	57	15	57	122	FEB 1	National Science Foundation Under The Engineering Design And System Engineering (Edse) [2050052];Div Of Civil, Mechanical, & Manufact Inn;Directorate For Engineering [2050052] Funding Source: National Science Foundation	Moghaddam, M (Corresponding Author), Northeastern Univ, Dept Mech & Ind Engn, Boston, Ma 02115 Usa.			Wos:000741659500018	10.1115/1.4052366	design concept evaluation is a key process in the new product development process with a significant impact on the product's success and total cost over its life cycle. this paper is motivated by two limitations of the state-of-the-art in concept evaluation: (1) the amount and diversity of user feedback and insights utilized by existing concept evaluation methods such as quality function deployme…	Yuan, Cx	Yuan, Cx;Leveraging End-User Data For Enhanced Design Concept Evaluation: A Multimodal Deep Regression Model	362
2022	2	Local Polynomial Smoothing Based On The Kaplan-Meier Estimate	Kaplan-Meier;Local Polynomial Fitting;Censoring;Bandwidth Selection	Hazard Rate Estimation;Nonparametric-Estimation;Bandwidth Selection;Density-Estimation;Convergence;Derivatives;Weak	Journal Of Statistical Planning And Inference	Bagkavos, D;Ioannides, D	Univ Macedonia;Univ Ioannina	Greece	Bagkavos, Dimitrios;Ioannides, Dimitrios	Statistics & Probability	Mathematics	0	1	2	1	27	DEC	Missing Fields	Bagkavos, D (Corresponding Author), Univ Ioannina, Dept Math, Ioannina 45110, Greece.			Wos:000806800500005	10.1016/J.Jspi.2022.04.006	the local polynomial modeling of the kaplan-meier estimate for random designs under the right censored data setting is investigated in detail. two classes of boundary aware estimates are developed: estimates of the distribution function and its derivatives of any arbitrary order and estimates of integrated distribution function derivative products. their statistical properties are quantified anal…	Bagkavos, D	Bagkavos, D;Local Polynomial Smoothing Based On The Kaplan-Meier Estimate	370
2022	51	Mechanical Cloak Via Data-Driven Aperiodic Metamaterial Design	Mechanical Cloaking;Metamaterials;Data-Driven Design;Multiscale Optimization	Missing Fields	Proceedings Of The National Academy Of Sciences Of The United States Of America	Wang, Lw;Boddapati, J;Liu, K;Zhu, P;Daraio, C;Chen, W	Shanghai Jiao Tong Univ;Caltech;Peking Univ;Northwestern Univ	Usa;Peoples R China	Wang, Liwei;Boddapati, Jagannadh;Liu, Ke;Zhu, Ping;Daraio, Chiara;Chen, Wei	Multidisciplinary Sciences	Science & Technology - Other Topics	17	111	55	111	38	MAR 29	Nsf Cyberinfrastructure For Sustained Scientific Innovation Program [Oac 1835782];Center For Hierarchical Materials Design (National Institute Of Standards And Technology [Nist]) [70Nanb19H005];Zhiyuan Honors Program For Graduate Students Of Shanghai Jiao Tong University	Zhu, P (Corresponding Author), Shanghai Jiao Tong Univ, Sch Mech Engn, State Key Lab Mech Syst & Vibrat, Shanghai 200240, Peoples R China;Chen, W (Corresponding Author), Northwestern Univ, Dept Mech Engn, Evanston, Il 60208 Usa;Daraio, C (Corresponding Author), Caltech, Div Engn & Appl Sci, Pasadena, Ca 91105 Usa.			Wos:000780674500006	10.1073/Pnas.2122185119	mechanical cloaks are materials engineered to manipulate the elastic response around objects to make them indistinguishable from their homogeneous surroundings. typically, methods based on material-parameter transformations are used to design optical, thermal, and electric cloaks. however, they are not applicable in designing mechanical cloaks, since continuum-mechanics equations are not form inv…	Wang, Lw	Wang, Lw;Mechanical Cloak Via Data-Driven Aperiodic Metamaterial Design	4
2022	12	Methodology For Mapping Form Design Elements With User Preferences Using Kansei Engineering And Vdi	Product Design;Kansei Engineering;Product Development;Data Mining;Vdi 2223	Product Development;Responses;Support;Models	Journal Of Engineering Design	Cok, V;Vlah, D;Povh, J	Univ Ljubljana	Slovenia	Cok, Vanja;Vlah, Daria;Povh, Janez	Engineering, Multidisciplinary	Engineering	7	93	12	93	62	FEB 1	Missing Fields	Cok, V (Corresponding Author), Univ Ljubljana, Fac Mech Engn, Lecad Lab, Askerceva 6, Ljubljana 1000, Slovenia.			Wos:000729720400001	10.1080/09544828.2021.2012133	in product development, decisions about the appearance of the product are risky and difficult to make. engineers and designers are aware that adding new design features or form design elements can degrade the visual appearance. therefore, it is important to understand how future users perceive different design configurations. in this paper, an adapted kansei engineering (ke) methodology focusing …	Cok, V	Cok, V;Methodology For Mapping Form Design Elements With User Preferences Using Kansei Engineering And Vdi	105
2022	5	Optimization Of The Shape Of A Hydrokinetic Turbine'S Draft Tube And Hub Assembly Using Design-By-Morphing With Bayesian Optimization	Draft-Tubes;Hydro-Kinetic Turbines;Design-By-Morphing;Shape Optimization;Bayesian Optimization;Mixmobo	Gaussian-Processes;Hydropower;Geometry;Nurbs	Computer Methods In Applied Mechanics And Engineering	Sheikh, Hm;Callan, Ta;Hennessy, Kj;Marcus, Ps	Univ Calif	Usa	Sheikh, Haris Moazam;Callan, Tess A;Hennessy, Kealan J;Marcus, Philip S	Engineering, Multidisciplinary;Mathematics, Interdisciplinary Applications;Mechanics	Engineering;Mathematics;Mechanics	1	6	5	6	75	NOV 1	National Science Foundation [Aci-1548562]	Sheikh, Hm (Corresponding Author), Univ Calif, Mech Engn Dept, 6116 Etcheverry Hall, Berkeley, Ca 94720 Usa.			Wos:000875711500007	10.1016/J.Cma.2022.115654	finding the optimal design of a hydrodynamic or aerodynamic surface is often impossible due to the expense of evaluating the cost functions (say, with computational fluid dynamics) needed to determine the performances of the flows that the surface controls. in addition, inherent limitations of the design space itself due to imposed geometric constraints, conventional parameterization methods, and…	Sheikh, Hm	Sheikh, Hm;Optimization Of The Shape Of A Hydrokinetic Turbine'S Draft Tube And Hub Assembly Using Design-By-Morphing With Bayesian Optimization	28
2022	0	Packaging Decorative Pattern Design Based On Genetic Algorithm	Missing Fields	Missing Fields	Mobile Information Systems	Zhu, Ym;Gao, T	Nanjing Univ Posts & Telecommun;Tongmyong Univ	South Korea;Peoples R China	Zhu, Yunming;Gao, Tong	Computer Science, Information Systems;Telecommunications	Computer Science;Telecommunications	7	21	0	21	20	AUG 31	Missing Fields	Gao, T (Corresponding Author), Nanjing Univ Posts & Telecommun, Coll Media & Art, Nanjing, Peoples R China.			Wos:000863121300015	10.1155/2022/1244352	the science, art, and technology of covering or protecting things for distribution, storing, selling, and usage are known as packaging. decorative design is the process of applying color, line, texture, or pattern to an object. decorative design can be used to complement a structural design, or it can simply be a piece of art. designers not only have the necessary design knowledge and expertise b…	Zhu, Ym	Zhu, Ym;Packaging Decorative Pattern Design Based On Genetic Algorithm	216
2022	3	Perceptual Quantitative Decision Making And Evaluation Of Product Stylable Topology Design	Industrial Design;Topologizable Transformation;Product Styling Design;Perceptual Quantification;Decision Evaluation	Knowledge	Processes	Wang, Y;Zhao, Qx;Chen, J;Wang, Ww;Yu, Sh;Li, Cl;Jia, Dy	Shaanxi Univ Sci & Technol;Light Ind Xian Mechan Design Res Inst Co Ltd;Northwestern Polytech Univ	Peoples R China	Wang, Yi;Zhao, Qinxin;Chen, Jian;Wang, Weiwei;Yu, Suihuai;Li, Cunliang;Jia, Dongyi	Engineering, Chemical	Engineering	5	62	3	62	36	SEP	Innovation Capability Support Program Of Shaanxi [2021Pt-025];Key R&D Plan Program Of Shaanxi [2022Zdlgy06-05];"Young Outstanding" Talent Support Program Of Colleges And Universities In Shaanxi [2020-50];Research Program Of Humanities And Social Sciences Of Shaanxi Provincial Department Of Education [21Jk0070]	Wang, Y;Wang, Ww (Corresponding Author), Shaanxi Univ Sci & Technol, Sch Design & Art, Xian 710021, Peoples R China.			Wos:000859513600001	10.3390/Pr10091819	modeling is the primary point to conveying product characteristics. accurately capturing the image needs of users for modeling is an important way to effectively improve product design efficiency. quantitative theory type i is a method to solve the internal law between the user's target image and the product modeling characteristics by building a mathematical model. aiming at the problems of abun…	Wang, Y	Wang, Y;Perceptual Quantitative Decision Making And Evaluation Of Product Stylable Topology Design	67
2022	14	Product Design Lifecycle Information Model (Pdlim)	Product Design And Development Process;Lifecycle;Information Model;Crowdsourcing;Digital Twin	Digital Twin;Framework;Integration;Challenges	International Journal Of Advanced Manufacturing Technology	Niu, Xj;Wang, Ml;Qin, Sf	Northumbria Univ;Northwest A&F Univ	England;Peoples R China	Niu, Xiaojing;Wang, Meili;Qin, Shengfeng	Automation & Control Systems;Engineering, Manufacturing	Automation & Control Systems;Engineering	4	81	14	81	57	FEB	China Scholarship Council;Csc [.201606300041]	Qin, Sf (Corresponding Author), Northumbria Univ, Sch Design, Newcastle Upon Tyne Ne1 8St, Tyne & Wear, England.			Wos:000701897900006	10.1007/S00170-021-07945-Z	in response to rapidly changing market and customer needs, product design and development (pdd) is evolving into a human-centred and data-driven design paradigm. the design environment gets more open often involving crowdsourcing and the design process becomes more complex, considering product family design along product whole lifecycle development, and needing more data support. therefore, it is…	Niu, Xj	Niu, Xj;Product Design Lifecycle Information Model (Pdlim)	353
2022	2	Product Design Scheme Generation And Optimization Decisions While Considering Remanufacturability	Product Design;Remanufacturability;Axiomatic Design;Scheme Generation;Scheme Optimization	Parts	Mathematics	Xing, Sx;Jiang, Zg;Zhang, Xg;Wang, Y	Huanggang Normal Univ;Wuhan Univ Sci & Technol;Univ Brighton	England;Peoples R China	Xing, Shixiong;Jiang, Zhigang;Zhang, Xugang;Wang, Yan	Mathematics	Mathematics	3	32	2	32	26	JUL	National Natural Science Foundation Of China [52075396];National Key R&D Program Of China [2018Yfb2002103]	Zhang, Xg (Corresponding Author), Wuhan Univ Sci & Technol, Minist Educ, Key Lab Met Equipment & Control Technol, Wuhan 430081, Peoples R China;Zhang, Xg (Corresponding Author), Wuhan Univ Sci & Technol, Hubei Key Lab Mech Transmiss & Mfg Engn, Wuhan 430081, Peoples R China.			Wos:000832471500001	10.3390/Math10142477	social awareness of the environment has promoted the vigorous development of remanufacturing. traditional product design does not consider the remanufacturability, which leads to improper disposal at the end of the product's life, resulting in environmental pollution and resource waste. in this paper, a method for the generation and optimization of product design schemes was established, in which…	Xing, Sx	Xing, Sx;Product Design Scheme Generation And Optimization Decisions While Considering Remanufacturability	95
2022	4	Product Sustainable Design Information Model For Remanufacturing	Remanufacturing Process;Product Design;Random Generation Algorithm;Product Structure;Product Parameters	Missing Fields	International Journal Of Advanced Manufacturing Technology	Zhu, Jq;He, Mz	Guilin Inst Informat Technol;Hubei Univ Educ	Peoples R China	Zhu Jiaqi;He Meizhang	Automation & Control Systems;Engineering, Manufacturing	Automation & Control Systems;Engineering	2	27	4	27	14	2022 SEP 3	Missing Fields	He, Mz (Corresponding Author), Hubei Univ Educ, Coll Comp, Wuhan, Peoples R China.			Wos:000849469200002	10.1007/S00170-022-10002-Y	the increase of waste products on the market will lead to a shortage of resources and the deterioration of the environment. the premise of the realization of remanufacturing engineering is the redundancy of product design life. the method is to give new life to scrapped parts. however, there will be problems with customer demand orientation and fragmentation of parts. based on this research backg…	Zhu, Jq	Zhu, Jq;Product Sustainable Design Information Model For Remanufacturing	79
2022	4	Research On Decision Making Of Design For Coupling System Based On Complexity Composite	Decision Making Of Design;Complexity Composite;Complexity Prediction;Data Driven;Digital Design	Missing Fields	Processes	Zhang, P;Chen, Sh;Zhao, By;Nie, Zf	Hebei Hanguang Heavy Ind Co Ltd;Yueqing Inst Technol Innovat;Hebei Univ Technol	Peoples R China	Zhang, Peng;Chen, Shaohan;Zhao, Boyuan;Nie, Zifeng	Engineering, Chemical	Engineering	0	29	4	29	49	MAR	National Natural Science Foundation Of China [51975181]	Zhang, P (Corresponding Author), Hebei Univ Technol, Sch Mech Engn, Tianjin 300401, Peoples R China;Zhang, P (Corresponding Author), Hebei Univ Technol, Natl Engn Res Ctr Technol Innovat Method & Tool, Tianjin 300401, Peoples R China;Zhang, P (Corresponding Author), Yueqing Inst Technol Innovat, Yueqing 325600, Peoples R China.			Wos:000774311600001	10.3390/Pr10030542	with the continuous improvement in user demand and the increasingly obvious complexity characteristics, such as strong coupling and nonlinearity of the system, it has become a new problem faced by the decision making of conceptual design. decision-making methods in conceptual design such as traditional information axioms and the multi-criteria decision-making (mcdm) framework cannot provide a goo…	Zhang, P	Zhang, P;Research On Decision Making Of Design For Coupling System Based On Complexity Composite	359
2022	1	Research On Product Design Process Based On The Integration Of Perceptual Image And Brand Identity	Perceptual Image;Brand Identity;Product Design;Smart Gateway	Missing Fields	Design, User Experience, And Usability: Ux Research, Design, And Assessment, Pt I	Zhu, Zj;Zhang, Zy;Qin, Y;Li, Sy	Huazhong Univ Sci & Technol	Peoples R China	Zhu, Zhijuan;Zhang, Ziyi;Qin, Yan;Li, Siyi	Computer Science, Cybernetics;Computer Science, Interdisciplinary Applications;Ergonomics	Computer Science;Engineering	1	12	1	12	11	Missing Fields	Missing Fields	Zhang, Zy (Corresponding Author), Huazhong Univ Sci & Technol, Sch Mech Sci & Engn, Wuhan, Peoples R China.			Wos:000870210500011	10.1007/978-3-031-05897-4_11	perceptual image is an important theory often used in product design. however, under normal circumstances, product design does not rely on a single theory and method, but is the result of a combination of multiple considerations. this paper aims to integrate brand identity theory into the perceptual image design method and construct a comprehensive design process, in order to take into account th…	Zhu, Zj	Zhu, Zj;Research On Product Design Process Based On The Integration Of Perceptual Image And Brand Identity	99
2022	0	Robust Qualification Flows For Drc Decks Using High Coverage Synthetic Layout Generation	Lsg;Synthetic Layout Generation;Synthetic Test Case Generation;Drc Runset;Drc Unit Testing;Design Enablement;Dtco	Missing Fields	Dtco And Computational Patterning	Abdelmeged, Rg;Balagowni, S;Abdelaleem, A;Kwan, J;Kabeel, A;Rizk, S;Abouzeid, A	Intel Corp;Siemens Cairo;Siemens Fremont	Usa;Egypt	Abdelmeged, Ramy G;Balagowni, Srinivas;Abdelaleem, Ahmed;Kwan, Joe;Kabeel, Aliaa;Rizk, Sarah;Abouzeid, Ahmed	Computer Science, Interdisciplinary Applications;Engineering, Manufacturing;Engineering, Electrical & Electronic	Computer Science;Engineering	0	2	0	2	5	Missing Fields	Missing Fields	Abdelmeged, Rg (Corresponding Author), Intel Corp, Santa Clara, Ca 95051 Usa.			Wos:000844431900015	10.1117/12.2614085	design rules are geometric constraints imposed on ic layout to ensure products can be manufactured at an acceptable yield. designs are required to pass sign-off design rule check (drc) before tape-out. foundries rely on drc to ensure designs they accept are manufacturable. drc runsets must be accurate, complete, and reliable. drc runset qualification is critical in technology node deployment and …	Abdelmeged, Rg	Abdelmeged, Rg;Robust Qualification Flows For Drc Decks Using High Coverage Synthetic Layout Generation	179
2022	0	Scalar Field Prediction On Topologically-Varying Graphs Using Spectral Shape Encoding	Missing Fields	Stress	Proceedings Of Asme 2022 International Design Engineering Technical Conferences And Computers And Information In Engineering Conference, Idetc-Cie2022, Vol 3A	Ferguson, K;Hardin, J;Gillman, A;Kara, Lb	Air Force Res Lab;Carnegie Mellon Univ	Usa	Ferguson, Kevin;Hardin, James;Gillman, Andrew;Kara, Levent Burak	Automation & Control Systems;Engineering, Mechanical	Automation & Control Systems;Engineering	0	0	0	0	45	Missing Fields	Air Force Research Laboratory [S111068002]	Kara, Lb (Corresponding Author), Carnegie Mellon Univ, Visual Design & Engn Lab, Pittsburgh, Pa 15213 Usa.			Wos:001216897500017	Missing Fields	scalar fields, such as stress or temperature fields, are often calculated in shape optimization and design problems in engineering. for complex problems where shapes have varying topology and cannot be parametrized, data-driven scalar field prediction can be faster than traditional finite-element methods. however, current data-driven techniques to predict scalar fields are limited to a fixed grid…	Ferguson, K	Ferguson, K;Scalar Field Prediction On Topologically-Varying Graphs Using Spectral Shape Encoding	17
2022	1	Shape Control Of Elastic Objects Based On Implicit Sensorimotor Models And Data-Driven Geometric Features	Robotics;Visual Servoing;Deformable Objects;Shape Control	Servo Control	Intelligent Autonomous Systems 16, Ias-16	Ma, Wy;Zhu, Jh;Navarro-Alarcon, D	Delft Univ Technol;Hong Kong Polytech Univ;Honda Res Inst	Netherlands;Peoples R China	Ma, Wanyu;Zhu, Jihong;Navarro-Alarcon, David	Automation & Control Systems;Computer Science, Artificial Intelligence;Robotics	Automation & Control Systems;Computer Science;Robotics	0	4	1	4	19	Missing Fields	Research Grants Council [14203917, G-Polyu507/18];Jiangsu Industrial Technology Research Institute Collaborative Research Program Scheme [Zg9V];Key-Area Research And Development Program Of Guangdong Province 2020 [76];Polyu	Ma, Wy (Corresponding Author), Hong Kong Polytech Univ, Hung Hom, Hong Kong, Peoples R China.			Wos:000835746300040	10.1007/978-3-030-95892-3_40	this paper proposes a general approach to design automatic controls to manipulate elastic objects into desired shapes. the object's geometric model is defined as the shape feature based on the specific task to globally describe the deformation. raw visual feedback data is processed using classic regression methods to identify parameters of data-driven geometric models in real-time. our proposed m…	Ma, Wy	Ma, Wy;Shape Control Of Elastic Objects Based On Implicit Sensorimotor Models And Data-Driven Geometric Features	10
2022	14	Small Low-Contrast Target Detection: Data-Driven Spatiotemporal Feature Fusion And Implementation	Feature Extraction;Spatiotemporal Phenomena;Support Vector Machines;Object Detection;Drones;Videos;Surveillance;Computer Vision;Data Fusion;Machine Learning;Support Vector Machine (Svm);Target Detection	Filters;Objects;Flow	Ieee Transactions On Cybernetics	Xie, Jy;Gao, Cx;Wu, Jf;Shi, Zg;Chen, Jm	Zhejiang Univ;Alibaba Zhejiang Univ Joint Inst Frontier Technol	Peoples R China	Xie, Jiayang;Gao, Chengxing;Wu, Junfeng;Shi, Zhiguo;Chen, Jiming	Automation & Control Systems;Computer Science, Artificial Intelligence;Computer Science, Cybernetics	Automation & Control Systems;Computer Science	5	26	14	26	50	NOV	National Natural Science Foundation Of China [62088101, 61772467]	Chen, Jm (Corresponding Author), Zhejiang Univ, State Key Lab Ind Control Technol, Hangzhou 310027, Peoples R China.			Wos:000732264000001	10.1109/Tcyb.2021.3072311	detecting small low-contrast targets in the airspace is an essential and challenging task. this article proposes a simple and effective data-driven support vector machine (svm)-based spatiotemporal feature fusion detection method for small low-contrast targets. we design a novel pixel-level feature, called a spatiotemporal profile, to depict the discontinuity of each pixel in the spatial and temp…	Xie, Jy	Xie, Jy;Small Low-Contrast Target Detection: Data-Driven Spatiotemporal Feature Fusion And Implementation	393
2022	15	Study On Product Form Design Via Kansei Engineering And Virtual Reality	Kansei Engineering;Virtual Reality;Hairdryer;Form Deconstruction;Product Form Design	Consumer-Oriented Technology;System	Journal Of Engineering Design	Liu, X;Yang, Sx	Sichuan Univ	Peoples R China	Liu, Xing;Yang, Suixian	Engineering, Multidisciplinary	Engineering	21	125	15	125	39	JUN 3	Research Center Of Industry Design Of A Key Research Base Of Philosophy And Social Sciences In Colleges And Universities In Sichuan Province [Gysj2021-006]	Yang, Sx (Corresponding Author), Sichuan Univ, Sch Mech Engn, 24 South Sect 1,Yihuan Rd, Chengdu 610065, Peoples R China.			Wos:000801171200001	10.1080/09544828.2022.2078660	it is very important to predict the reaction of customers to future products. sample pictures and line sketches are commonly used for discovering consumers' demands. however, these two agents are difficult to express the real product form clearly and comprehensively, which may affect the accuracy of consumer affection prediction. in this paper, a method based on kansei engineering via virtual rea…	Liu, X	Liu, X;Study On Product Form Design Via Kansei Engineering And Virtual Reality	96
2022	21	The Implementation Of Industry 4.0 In Manufacturing: From Lean Manufacturing To Product Design	Industry 4;0;Lean Manufacturing;Value Stream Mapping;Legacy Machine;Weighted Graph Representation;Leanness Score	Of-The-Art;Flat Patterns;Conceptual-Framework;Mass Customization;Folded Structures;Time	International Journal Of Advanced Manufacturing Technology	Huang, Zy;Jowers, C;Kent, D;Dehghan-Manshadi, A;Dargusch, Ms	Univ Sunshine Coast;Univ Queensland	Australia	Huang, Zhuoyu;Jowers, Casey;Kent, Damon;Dehghan-Manshadi, Ali;Dargusch, Matthew S	Automation & Control Systems;Engineering, Manufacturing	Automation & Control Systems;Engineering	16	74	21	74	61	JUL	Queensland Centre For Advanced Material Processing And Manufacturing (Ampam);Caul	Huang, Zy (Corresponding Author), Univ Queensland, Sch Mech & Min Engn, Brisbane, Qld 4072, Australia;Huang, Zy (Corresponding Author), Univ Queensland, Ctr Adv Mat Proc & Mfg Ampam, Brisbane, Qld 4072, Australia.			Wos:000813607200001	10.1007/S00170-022-09511-7	with the emergence of industry 4.0, digitalization and intelligent manufacturing are vital to ensure competitivity, especially for manufacturers reliant on legacy machines. upgrading legacy machines with cyber physical technology under industry 4.0 frameworks can enable connection of these machines to existing iot networks to allow the sharing and exchange of production information. in this paper…	Huang, Zy	Huang, Zy;The Implementation Of Industry 4.0 In Manufacturing: From Lean Manufacturing To Product Design	137
2022	5	Toward Product Green Design Of Modeling, Assessment, Optimization, And Tools: A Comprehensive Review	Green Design;Modeling For Green Design;Life Cycle Assessment;Optimization For Green Design;Green Design Tools	Life-Cycle Assessment;Analytic Hierarchy Process;Fuzzy-Ahp Approach;Conceptual Design;Decision-Making;Integrated Approach;Matrix-Methods;System;Lca;Alternatives	International Journal Of Advanced Manufacturing Technology	Kong, L;Wang, Lm;Li, Fy;Guo, J	Shandong Univ	Peoples R China	Kong, Lin;Wang, Liming;Li, Fangyi;Guo, Jing	Automation & Control Systems;Engineering, Manufacturing	Automation & Control Systems;Engineering	12	111	5	111	154	SEP	National Key R&D Program Of China [2020Yfb1711603];National Natural Science Foundation Of China [52175473];Key Technology R&D Program Of Shandong [2020Cxgc011004]	Wang, Lm (Corresponding Author), Shandong Univ, Sch Mech Engn, Minist Educ, Key Lab High Efficiency & Clean Mech Manufacture, Jinan 250061, Peoples R China;Wang, Lm (Corresponding Author), Shandong Univ, Natl Demonstrat Ctr Expt Mech Engn Educ, Jinan 250061, Peoples R China.			Wos:000851353500005	10.1007/S00170-022-10021-9	serious environmental problems, such as global resource depletion and climate warming, have currently become the most discussed issues. the design and development of a green product is crucial for mitigating environmental problems. note that product design determines nearly 80% of the product cost and 70% of the environmental impact, which has a decisive impact on the product life cycle. therefor…	Kong, L	Kong, L;Toward Product Green Design Of Modeling, Assessment, Optimization, And Tools: A Comprehensive Review	112
2022	5	Upright-Net: Learning Upright Orientation For 3D Point Cloud	Missing Fields	Shapes	2022 Ieee/Cvf Conference On Computer Vision And Pattern Recognition (Cvpr 2022)	Pang, Xf;Li, F;Ding, N;Zhong, Xp	Shenzhen Univ;Chinese Univ Hong Kong;Shenzhen Inst Artificial Intelligence & Robot Soc	Peoples R China	Pang, Xufang;Li, Feng;Ding, Ning;Zhong, Xiaopin	Computer Science, Artificial Intelligence;Imaging Science & Photographic Technology	Computer Science;Imaging Science & Photographic Technology	1	4	5	4	27	Missing Fields	National Key R&D Program Of China [2021Yfe0204200];National Natural Science Foundation Of China [62106155, U1813216, 61806190];Guangdong Basic And Applied Basic Research Foundation [2021B1515420005, 2021A1515010926];Shenzhen Science And Technology Program [Jcyj20180305123922293, Jsgg20210802152801004]	Ding, N (Corresponding Author), Shenzhen Inst Artificial Intelligence & Robot Soc, Shenzhen, Peoples R China;Ding, N (Corresponding Author), Chinese Univ Hong Kong, Inst Robot & Intelligent Mfg, Hong Kong, Peoples R China;Zhong, Xp (Corresponding Author), Shenzhen Univ, Coll Mechatron & Control Engn, Shenzhen, Peoples R China.			Wos:000870783000047	10.1109/Cvpr52688.2022.01449	a mass of experiments shows that the pose of the input 3d models exerts a tremendous influence on automatic 3d shape analysis. in this paper, we propose upright-net, a deep-learning-based approach for estimating the upright orientation of 3d point clouds. based on a well-known postulate of design states that "form ever follows function", we treat the natural base of an object as a common function…	Pang, Xf	Pang, Xf;Upright-Net: Learning Upright Orientation For 3D Point Cloud	59
2022	1	Zero-Shot Multi-Modal Artist-Controlled Retrieval And Exploration Of 3D Object Sets	Neural Networks;Computer Graphics	Missing Fields	Siggraph Asia 2022 Technical Communications Proceedings, Siggraph 2022	Schlachter, K;Ahlbrand, B;Wang, Z;Ortenzi, V;Perlin, K	Nyu;Unity Technol	Usa	Schlachter, Kristofer;Ahlbrand, Benjamin;Wang, Zhu;Ortenzi, Valerio;Perlin, Ken	Computer Science, Software Engineering;Computer Science, Theory & Methods;Imaging Science & Photographic Technology	Computer Science;Imaging Science & Photographic Technology	0	3	1	3	15	Missing Fields	Missing Fields	Schlachter, K (Corresponding Author), Unity Technol, San Francisco, Ca 94103 Usa.			Wos:001109886500010	10.1145/3550340.3564216	when creating 3d content, highly specialized skills are generally needed to design and generate models of objects and other assets by hand. we address this problem through high-quality 3d asset retrieval from multi-modal inputs, including 2d sketches, images and text. we use clip as it provides a bridge to higher-level latent features. we use these features to perform a multi-modality fusion to a…	Schlachter, K	Schlachter, K;Zero-Shot Multi-Modal Artist-Controlled Retrieval And Exploration Of 3D Object Sets	148
2023	6	A Customer Requirements Analysis Method Of Considering Product Scenarios For Improving Product Design	Product Improvement;Customer Requirements;Network Analysis;Text Mining	Missing Fields	Journal Of Engineering Design	Sun, H;Ong, Sk;Nee, Ayc;Guo, W	Tianjin Univ;Natl Univ Singapore	Singapore;Peoples R China	Sun, Hui;Ong, S K;Nee, A Y C;Guo, Wei	Engineering, Multidisciplinary	Engineering	21	72	6	72	43	JUN 3	China Scholarship Council;National University Of Singapore [202106250088]	Guo, W (Corresponding Author), Tianjin Univ, Sch Mech Engn, Tianjin Key Lab Equipment Design & Mfg Technol, Tianjin 300072, Peoples R China.			Wos:001010037400001	10.1080/09544828.2023.2225843	with increasing concerns on customer requirements (crs) in product improvement, the research of integrating product scenarios into crs analysis has attracted the attention of designers. importance-performance-analysis (ipa), which can be used to represent the relationship between cr importance and product performance, is a well-known model for analyzing crs. however, a major challenge of the ipa …	Sun, H	Sun, H;A Customer Requirements Analysis Method Of Considering Product Scenarios For Improving Product Design	91
2023	2	A Data Driven Dantzig-Wolfe Decomposition Framework	Missing Fields	Missing Fields	Mathematical Programming Computation	Basso, S;Ceselli, A	Usi Supsi;Univ Milan	Switzerland;Italy	Basso, Saverio;Ceselli, Alberto	Computer Science, Software Engineering;Operations Research & Management Science;Mathematics, Applied	Computer Science;Operations Research & Management Science;Mathematics	1	4	2	4	38	MAR	Universita Degli Studi Di Milano Within The Crui-Care Agreement;Universita Degli Studi Di Milano, Piano Sostegno Alla Ricerca	Ceselli, A (Corresponding Author), Univ Milan, Dipartimento Informat, Via Celoria 18, I-20133 Milan, Italy.			Wos:000878024400001	10.1007/S12532-022-00230-4	we face the issue of finding alternative paradigms for the resolution of generic mixed integer programs (mip), by considering the perspective option of general purpose solvers which switch to decomposition methods when pertinent. currently, the main blocking factor in their design is the problem of automatic decomposition of mips, that is to produce good mip decompositions algorithmically, lookin…	Basso, S	Basso, S;A Data Driven Dantzig-Wolfe Decomposition Framework	309
2023	0	A Data-Driven Human-Machine Collaborative Product Design System Toward Intelligent Manufacturing	Data Mining;Product Design;Collaboration;Manufacturing;Human-Machine Systems;Knowledge Engineering;Atmospheric Modeling;Data-Driven Design;Product Life Cycle Data;Data Mining;Human-Machine Collaboration;Knowledge Management;Knowledge Push	Reviews;Needs	Ieee Transactions On Automation Science And Engineering	Wei, W;Jiang, C;Huang, Yz	Beihang Univ	Peoples R China	Wei, Wei;Jiang, Chuan;Huang, Yuzhe	Automation & Control Systems	Automation & Control Systems	39	67	0	67	42	2023 NOV 23	National Key Research And Development Program Of China	Wei, W (Corresponding Author), Beihang Univ, Dept Ind & Mfg Syst Engn, Beijing 100191, Peoples R China.			Wos:001122496400001	10.1109/Tase.2023.3295571	in the era of big data, enterprises have accumulated large amounts of valuable data throughout the entire product life cycle (plc). such plc data contains a wealth of design knowledge. intelligent manufacturing seeks to establish a collaborative platform that integrates advanced data analytics and artificial intelligence into the manufacturing process, providing new opportunities for efficient an…	Wei, W	Wei, W;A Data-Driven Human-Machine Collaborative Product Design System Toward Intelligent Manufacturing	268
2023	2	A Function-Behavior Mapping Approach For Product Conceptual Design Inspired By Memory Mechanism	Conceptual Design;Situated Function-Behavior-Structure;Memory Mechanism;Reinforcement Learning	Innovation;Model	Advanced Engineering Informatics	Lou, Sh;Feng, Yx;Gao, Yc;Zheng, H;Peng, T;Tan, Jr	Nanyang Technol Univ;Zhejiang Univ;Beihang Univ	Singapore;Peoples R China	Lou, Shanhe;Feng, Yixiong;Gao, Yicong;Zheng, Hao;Peng, Tao;Tan, Jianrong	Computer Science, Artificial Intelligence;Engineering, Multidisciplinary	Computer Science;Engineering	10	23	2	23	42	OCT	National Natural Science Foundation Of China [52130501, 52375272];Natural Science Foundation Of Zhejiang Province, China [Lr22E050006, Lgg21E050003]	Feng, Yx;Gao, Yc (Corresponding Author), Zhejiang Univ, State Key Lab Fluid Power & Mechatron Syst, Hangzhou, Peoples R China.			Wos:001112785900001	10.1016/J.Aei.2023.102236	conceptual design is a pivotal stage for new product development that relies more on designers to solve open-ended and ill-defined problems. situated function-behavior-structure ontology is an acknowledged method to facilitate conceptual design in a goal-oriented way. however, it depends on the subjective cognition abilities of designers, which are influenced by limited memory and reasoning capac…	Lou, Sh	Lou, Sh;A Function-Behavior Mapping Approach For Product Conceptual Design Inspired By Memory Mechanism	73
2023	3	A Modeling Design Method For Complex Products Based On Lstm Neural Network And Kansei Engineering	Cps;Modeling Design;Kansei Engineering;Lstm Neural Network;Ga;Truck Crane	Consumer-Oriented Technology;Hybrid Approach;Test-Retest;Construction	Applied Sciences-Basel	Duan, Jj;Luo, Ps;Liu, Q;Sun, Fa;Zhu, Lm	Tiangong Univ;Beijing Coll Social Adm;Tianjin Univ;Nankai Univ	Peoples R China	Duan, Jin-Juan;Luo, Ping-Sheng;Liu, Qi;Sun, Feng-Ao;Zhu, Li-Ming	Chemistry, Multidisciplinary;Engineering, Multidisciplinary;Materials Science, Multidisciplinary;Physics, Applied	Chemistry;Engineering;Materials Science;Physics	9	64	3	64	67	JAN	Chinese Ministry Of Education'S Collaborative Education Project Of Production And Education [202102071001]	Duan, Jj (Corresponding Author), Beijing Coll Social Adm, Sch Wedding Culture & Media Arts, Beijing 102600, Peoples R China;Duan, Jj (Corresponding Author), Tiangong Univ, Sch Mech Engn, Tianjin 300387, Peoples R China.			Wos:000914488200001	10.3390/App13020710	featured application the proposed cp-kedl system is supposed to evaluate and predict users' perceptual preferences of complex products accurately and comprehensively and quickly generate a set of modeling feature elements that meet the perceptual needs of users to provide design inspiration for complex products for designers. complex products (cps) modeling design has a long development cycle and…	Duan, Jj	Duan, Jj;A Modeling Design Method For Complex Products Based On Lstm Neural Network And Kansei Engineering	132
2023	5	A Reverse Engineering-Based Model For Innovation Process In Complex Product Systems: Multiple Case Studies In The Aviation Industry	Innovation Process;Reverse Engineering (Re);Forward Engineering (Fe);Complex Product Systems (Cops);New Product Development (Npd);Product Life Cycle;Aviation Industry	Design Recovery;Catch-Up;Technology;Organization;Framework;Patterns;China;Form;Tool	Journal Of Engineering And Technology Management	Rozesara, M;Ghazinoori, S;Manteghi, M;Tabatabaeian, Sh	Allameh Tabatabai Univ;Natl Res Inst Sci Policy Nrisp	Iran	Rozesara, Maryam;Ghazinoori, Soroush;Manteghi, Manouchehr;Tabatabaeian, Seyed Habibollah	Business;Engineering, Industrial;Management	Business & Economics;Engineering	15	41	5	41	94	JUL-SEP	Missing Fields	Rozesara, M (Corresponding Author), Natl Res Inst Sci Policy Nrisp, Dept Scientometr, 9 Soheil St,South Shirazi St,Mollasadra Ave,Vanak, Tehran, Iran.			Wos:001062192300001	10.1016/J.Jengtecman.2023.101765	reverse engineering is an activity of innovation based on knowledge and data acquired from the earlier design, which plays a significant role in complex product systems (cops) industries. however, no study has yet been conducted on the innovation process based on reverse engineering in these industries. this paper provides a model for this process and addresses hidden and unknown interactions bet…	Rozesara, M	Rozesara, M;A Reverse Engineering-Based Model For Innovation Process In Complex Product Systems: Multiple Case Studies In The Aviation Industry	231
2023	3	A Semantic Data-Driven Knowledge Base Construction Method To Assist Designers In Design Inspiration Based On Traditional Motifs	Traditional Motifs;Knowledge Base;Knowledge Representation Method;Industrial Design;Design Inspiration	Representation;Ontology;Features;Shape	Advanced Engineering Informatics	Hou, Xg;Gou, Bc;Chen, Dk;Chu, Jj	Northwestern Polytech Univ	Peoples R China	Hou, Xinggang;Gou, Bingchen;Chen, Dengkai;Chu, Jianjie	Computer Science, Artificial Intelligence;Engineering, Multidisciplinary	Computer Science;Engineering	14	56	3	56	60	APR	National Key R & D Special Project In China [2019Yfb1405702]	Hou, Xg (Corresponding Author), Northwestern Polytech Univ, Key Lab Minist Ind Design & Ergon, Minist Ind & Informat Technol, Xian 710072, Peoples R China.			Wos:000998575600001	10.1016/J.Aei.2023.101987	directing at the problem of inaccurate expression of tacit knowledge and low heuristic of retrieval results in the design inspiration drawing process of designers based on traditional motifs, a semantic data representation method of traditional motifs knowledge is put forward, and an effective knowledge base construction and knowledge retrieval method for traditional motifs are described. first, …	Hou, Xg	Hou, Xg;A Semantic Data-Driven Knowledge Base Construction Method To Assist Designers In Design Inspiration Based On Traditional Motifs	16
2023	11	A Small Sample Data-Driven Method: User Needs Elicitation From Online Reviews In New Product Iteration	Small Sample Data-Driven;User Needs Elicitation;New Product Iteration;Ernie;Improved Sifrank	Requirements;Classification;Design	Advanced Engineering Informatics	Cong, Yf;Yu, Sh;Chu, Jj;Su, Zj;Huang, Yx;Li, Fl	Delft Univ Technol;Northwestern Polytech Univ	Netherlands;Peoples R China	Cong, Yangfan;Yu, Suihuai;Chu, Jianjie;Su, Zhaojing;Huang, Yuexin;Li, Feilong	Computer Science, Artificial Intelligence;Engineering, Multidisciplinary	Computer Science;Engineering	20	83	11	83	53	APR	[D5130200012]	Cong, Yf;Yu, Sh;Chu, Jj (Corresponding Author), Northwestern Polytech Univ, Key Lab Minist Ind Design & Ergon, Minist Ind & Informat Technol, Xian 710072, Peoples R China.			Wos:000968276000001	10.1016/J.Aei.2023.101953	eliciting user needs from mass online reviews is playing a significant role in the product iteration process. efficient user needs elicitation does achieve considerable benefits for maintaining higher competitiveness and a speedier lifecycle. however, there is inevitably an online review scarcity about new products due to the short time on the market and low buyer recognition compared with common…	Cong, Yf	Cong, Yf;A Small Sample Data-Driven Method: User Needs Elicitation From Online Reviews In New Product Iteration	284
2023	0	A Study On The Innovative Design Of Fuzhou "Fu" Cultural Tourism Products Based On Design Heuristics	Innovative Design;Design Heuristic;Cultural Product	Idea Generation;Conceptual Design;Technology;Metrics	Cross-Cultural Design, Pt I, Ccd 2023	Cao, X;Hsu, Y;Wu, Wl	Tatung Univ;Fuzhou Univ Int Studies & Trade	Taiwan;Peoples R China	Cao, Xin;Hsu, Yen;Wu, Weilong	Computer Science, Information Systems;Computer Science, Interdisciplinary Applications;Computer Science, Software Engineering	Computer Science	7	7	0	7	40	Missing Fields	Fuzhou University Of International Studies And Trade Project "Research On The Innovative Design Strategy Of Fuzhou "Fu" Cultural Products Based On Design Heuristics" [Fwx21018]	Cao, X (Corresponding Author), Fuzhou Univ Int Studies & Trade, 28 Yuhuan Rd,Shouzhan New 0 Dist, Fuzhou 350202, Fujian, Peoples R China;Cao, X (Corresponding Author), Tatung Univ, Grad Inst Design Sci, 40,Sec 3,Zhongshan N Rd, Taipei 104, Taiwan.			Wos:001284763000001	10.1007/978-3-031-35936-1_1	innovative design methods for cultural products have gradually become a research hotspot in the international design community. at present, most of the products in the market are designed to reflect cultural connotations through the simple use of traditional patterns, or even the direct application of traditional product styles to modern product design, without fully considering the characteristi…	Cao, X	Cao, X;A Study On The Innovative Design Of Fuzhou "Fu" Cultural Tourism Products Based On Design Heuristics	161
2023	7	A Twin Data-Driven Approach For User-Experience Based Design Innovation	User Experience;Data-Driven;Product Design;Design Innovation;Requirement Analysis	Conceptual Design;Decision-Making;Product;Classification;Reviews	International Journal Of Information Management	Yang, B;Liu, Y;Chen, W	Chongqing Technol & Business Univ;Cardiff Univ	Wales;Peoples R China	Yang, Bai;Liu, Ying;Chen, Wei	Information Science & Library Science	Information Science & Library Science	14	87	7	87	61	FEB	Natural Science Foundation Of Chongqing [Cstb2022Nscq-Msx1565, Cstc2020Jcyj-Msxmx0864]	Liu, Y (Corresponding Author), Cardiff Univ, Sch Engn, Dept Mech Engn, Cardiff Cf24 3Aa, Wales.			Wos:000892146500012	10.1016/J.Ijinfomgt.2022.102595	data-driven innovation has received increasing attention, which explores big data technologies to gain more insights and advantages for product design. in user experience (ux) based design innovation, user-generated data and archived design documents are two valuable resources for various design activities such as identifying opportunities and generating design ideas. however, these two resources…	Yang, B	Yang, B;A Twin Data-Driven Approach For User-Experience Based Design Innovation	277
2023	0	Aesthetics Plus Plus : Refining Graphic Designs By Exploring Design Principles And Human Preference	Visualization;Statistical Analysis;Refining;Prototypes;Color;Automatic Refinement Suggestion;Design Principles;Data-Driven Approach;Aesthetic Quality	Missing Fields	Ieee Transactions On Visualization And Computer Graphics	Kong, Wy;Jiang, Zy;Sun, Sz;Guo, Zn;Cui, Ww;Liu, T;Lou, Jg;Zhang, Dm	Harbin Inst Technol;Xi An Jiao Tong Univ;Peking Univ;Microsoft Res Asia	Peoples R China	Kong, Wenyuan;Jiang, Zhaoyun;Sun, Shizhao;Guo, Zhuoning;Cui, Weiwei;Liu, Ting;Lou, Jianguang;Zhang, Dongmei	Computer Science, Software Engineering	Computer Science	5	20	0	20	33	JUN 1	Missing Fields	Sun, Sz (Corresponding Author), Microsoft Res Asia, Beijing 100080, Peoples R China.			Wos:000981880500019	10.1109/Tvcg.2022.3151617	during the creation of graphic designs, individuals inevitably spend a lot of time and effort on adjusting visual attributes (e.g., positions, colors, and fonts) of elements to make them more aesthetically pleasing. it is a trial-and-error process, requires repetitive edits, and relies on good design knowledge. in this work, we seek to alleviate such difficulty by automatically suggesting aesthet…	Kong, Wy	Kong, Wy;Aesthetics Plus Plus : Refining Graphic Designs By Exploring Design Principles And Human Preference	396
2023	2	An Efficient Fisher Matrix Approximation Method For Large-Scale Neural Network Optimization	Empirical Risk Minimization Problems;Stochastic Optimization;Natural Gradient Method;Convergence	Quasi-Newton Method	Ieee Transactions On Pattern Analysis And Machine Intelligence	Yang, Mh;Xu, D;Cui, Qw;Wen, Zw;Xu, Px	Univ Washington;Damo Acad;Peng Cheng Lab;Peking Univ	Usa;Peoples R China	Yang, Minghan;Xu, Dong;Cui, Qiwen;Wen, Zaiwen;Xu, Pengxiang	Computer Science, Artificial Intelligence;Engineering, Electrical & Electronic	Computer Science;Engineering	0	10	2	10	33	MAY 1	Nsfc [11831002]	Wen, Zw (Corresponding Author), Peking Univ, Coll Engn, Beijing Int Ctr Math Res, Beijing 100871, Peoples R China.			Wos:000964792800004	10.1109/Tpami.2022.3213654	although the shapes of the parameters are not crucial for designing first-order optimization methods in large scale empirical risk minimization problems, they have important impact on the size of the matrix to be inverted when developing second-order type methods. in this article, we propose an efficient and novel second-order method based on the parameters in the real matrix space r-mxn and a ma…	Yang, Mh	Yang, Mh;An Efficient Fisher Matrix Approximation Method For Large-Scale Neural Network Optimization	258
2023	17	An Improved Kansei Engineering Method Based On The Mining Of Online Product Reviews	Product Emotional Design;Kansei Engineering;Online Review Mining;Mapping Model	Rough Set;Design	Alexandria Engineering Journal	Liu, Zh;Wu, Jf;Chen, Qp;Hu, T	Guiyang Univ	Peoples R China	Liu, Zhenghong;Wu, Jiafu;Chen, Qipeng;Hu, Tao	Engineering, Multidisciplinary	Engineering	23	143	17	143	21	FEB 15	National Natural Science Foundation Of China [52105248];Science And Technology Top Talent Project Of Guizhou Provincial Department Of Education [[2022]086];Guiyang Science And Technology Bureau;Guiyang University [Gyu-Ky-[2022]]	Hu, T (Corresponding Author), Guiyang Univ, Sch Mech Engn, Guiyang 550005, Peoples R China.			Wos:000921134200001	10.1016/J.Aej.2022.09.044	the explosive growth of online review data on e-commerce websites demands major changes to product emotional design. kansei engineering, the primary approach of product emotional design, faces multiple problems. this study aims to improve kansei engineering method to adapt to the emotional design trends of the big data era. targeting the data of online product reviews, the authors mined text data…	Liu, Zh	Liu, Zh;An Improved Kansei Engineering Method Based On The Mining Of Online Product Reviews	121
2023	0	Application Of Image Fusion Algorithm Based On Digital Media Technology In Modeling Design	Digital Media;Image Fusion;Modeling Design;Image Processing;Wearable Equipment	Missing Fields	Journal Of Electronic Imaging	Ma, Zl	Wuzhou Univ	Peoples R China	Ma, Zhilai	Engineering, Electrical & Electronic;Optics;Imaging Science & Photographic Technology	Engineering;Optics;Imaging Science & Photographic Technology	3	15	0	15	24	JAN 1	Missing Fields	Ma, Zl (Corresponding Author), Wuzhou Univ, Sch Jewelry & Art Design, Wuzhou, Peoples R China.			Wos:000965365700017	10.1117/1.Jei.32.1.011213	the product modeling design is the concrete manifestation of realizing the unified identification goal of the corporate image. it can shape and disseminate the corporate image, create individual brands, and win in the fierce market competition. the product modeling design needs to serve the overall image design of the enterprise, with product design as the core, around people's needs for products…	Ma, Zl	Ma, Zl;Application Of Image Fusion Algorithm Based On Digital Media Technology In Modeling Design	169
2023	0	Automating Style Analysis And Visualization With Explainable Ai - Case Studies On Brand Recognition	Graph Neural Network;Scalar Vector Graphics;Explainable Ai;Feature Recognition;Design Automation;Deep Learning;Signal Processing	Product Design;Shape	Proceedings Of Asme 2023 International Design Engineering Technical Conferences And Computers And Information In Engineering Conference, Idetc-Cie2023, Vol 3A	Chen, Yh;Kara, Lb;Cagan, J	Carnegie Mellon Univ	Usa	Chen, Yu-Hsuan;Kara, Levent Burak;Cagan, Jonathan	Engineering, Industrial;Engineering, Manufacturing;Engineering, Mechanical	Engineering	0	0	0	0	60	Missing Fields	National Science Foundation [Cmmi-2113301]	Chen, Yh (Corresponding Author), Carnegie Mellon Univ, Dept Mech Engn, Pittsburgh, Pa 15213 Usa.			Wos:001221579000006	Missing Fields	incorporating style-related objectives into shape design has been centrally important to maximize product appeal. however, stylistic features such as aesthetics and semantic attributes are hard to codify even for experts. as such, algorithmic style capture and reuse have not fully benefited from automated data-driven methodologies due to the challenging nature of design describability. this paper…	Chen, Yh	Chen, Yh;Automating Style Analysis And Visualization With Explainable Ai - Case Studies On Brand Recognition	52
2023	10	Big Data And Ai-Driven Product Design: A Survey	Product Design;Big Data;Ai Algorithm;Ai-Generated Content;Kansei Engineering;Generative Design	Generative Adversarial Network;Quality Function Deployment;Fuzzy Mcdm Approach;Sentiment Analysis;Kano Model;Customer Satisfaction;Learning Approach;Chinese Reviews;Self-Attention;Online Reviews	Applied Sciences-Basel	Quan, Hf;Li, Sb;Zeng, Cc;Wei, Hj;Hu, Jj	Guizhou Inst Technol;Univ South Carolina;Guizhou Univ;Civil Aviat Flight Univ China;Guizhou Univ Finance & Econ	Usa;Peoples R China	Quan, Huafeng;Li, Shaobo;Zeng, Changchang;Wei, Hongjing;Hu, Jianjun	Chemistry, Multidisciplinary;Engineering, Multidisciplinary;Materials Science, Multidisciplinary;Physics, Applied	Chemistry;Engineering;Materials Science;Physics	117	326	10	326	245	AUG	Guizhou Provincial Basic Research Program (Natural Science) [Zk[2023]029];Guizhou Provincial Department Of Education Youth Science And Technology Talents Growth Project [Ky[2022]209]	Hu, Jj (Corresponding Author), Univ South Carolina, Dept Comp Sci & Engn, Columbia, Sc 29201 Usa.			Wos:001056354500001	10.3390/App13169433	as living standards improve, modern products need to meet increasingly diversified and personalized user requirements. traditional product design methods fall short due to their strong subjectivity, limited survey scope, lack of real-time data, and poor visual display. however, recent progress in big data and artificial intelligence (ai) are bringing a transformative big data and ai-driven produc…	Quan, Hf	Quan, Hf;Big Data And Ai-Driven Product Design: A Survey	39
2023	4	Bionic Design Model For Co-Creative Product Innovation Based On Deep Generative And Bid	Bionic Design;Deep Generative;Product Design;Image Generation;Stylegan	Biomimicry;Novelty	International Journal Of Computational Intelligence Systems	Deng, Zg;Lv, J;Liu, X;Hou, Yk	Guizhou Univ	Peoples R China	Deng, Zhenggen;Lv, Jian;Liu, Xiang;Hou, Yukang	Computer Science, Artificial Intelligence;Computer Science, Interdisciplinary Applications	Computer Science	41	123	4	123	45	FEB 6	Natural Science Foundation Of China [52065010];Guizhou Provincial Science And Technology Department Project, China [Zk [2021]-341, [2021]-397]	Lv, J (Corresponding Author), Guizhou Univ, Minist Educ, Key Lab Adv Mfg Technol, Guiyang 550025, Guizhou, Peoples R China.			Wos:000926838400001	10.1007/S44196-023-00187-9	bio-inspired design (bid) is an abstract process, if we can visualize the process of fusing abstract biological inspiration with figurative product shapes, and combine it with artificial intelligence technology to express the designer's creativity, it will greatly improve the efficiency and accuracy of product shape bionic design. to address this problem, we combine bid with deep generative (dg) …	Deng, Zg	Deng, Zg;Bionic Design Model For Co-Creative Product Innovation Based On Deep Generative And Bid	168
2023	13	Combining Gra With A Fuzzy Qfd Model For The New Product Design And Development Of Wickerwork Lamps	Gra;Fuzzy Qfd;Product Design;Wickerwork Lamps;Design Parameters	Quality Function Deployment;Rough Set-Theory;Customer Requirements;Kanos Model;Framework;Satisfaction;Integration;Construct;Identify	Sustainability	Wang, Tx;Yang, L	Anhui Univ;Anhui Jianzhu Univ	Peoples R China	Wang, Tianxiong;Yang, Liu	Green & Sustainable Science & Technology;Environmental Sciences;Environmental Studies	Science & Technology - Other Topics;Environmental Sciences & Ecology	15	80	14	80	79	MAR	Anhui Quality Engineering Project [2021Jyxm0082];Humanities And Social Sciences Project Of Anhui Provincial Education Department [Sk2021A0058];Anhui University Quality Engineering Project [2022Xjzlgc214]	Wang, Tx (Corresponding Author), Anhui Univ, Sch Art, Hefei 230601, Peoples R China.			Wos:000947592300001	10.3390/Su15054208	with the popularization of the concept of sustainability in traditional wickerwork, wickerwork lamps have become the most popular production. when customers purchase wickerwork lamp products, the kansei consensus has become a key factor influencing the communication between manufacturers and customers. therefore, the purpose of this paper is to explore the product design solutions for wickerwork …	Wang, Tx	Wang, Tx;Combining Gra With A Fuzzy Qfd Model For The New Product Design And Development Of Wickerwork Lamps	68
2023	1	Construction And Application Of Data-Driven Knowledge Adjacency Network For Product Cmf Design	Product Design;Adjacency Network;User Preference;Resource Matching;Product Cmf	Selection;System	Journal Of Advanced Mechanical Design Systems And Manufacturing	Liu, C;Kim, K	Silla Univ	South Korea	Liu, Chao;Kim, Kiesu	Engineering, Manufacturing;Engineering, Mechanical	Engineering	15	62	1	62	31	Missing Fields	Missing Fields	Kim, K (Corresponding Author), Silla Univ, Coll Design, 140 Baegyang Daero 700Beon Gil, Pusan 46958, South Korea.			Wos:000958388600001	10.1299/Jamdsm.2023Jamdsm0032	to solve the problems of over-reliance on personal experience, lack of thinking about users' perceptual preferences, and neglect of the overall coupling characteristics of cmf design, the construction and application methods of product cmf design knowledge adjacency network are proposed based on the multi-layer network, intuitionistic fuzzy set, and gray correlation method theory. firstly, the co…	Liu, C	Liu, C;Construction And Application Of Data-Driven Knowledge Adjacency Network For Product Cmf Design	323
2023	0	Context-Aware 3D Points Of Interest Detection Via Spatial Attention Mechanism	3D Point Of Interest;Deep Learning;Attention Mechanism	Saliency	Acm Transactions On Multimedia Computing Communications And Applications	Shu, Z;Gao, L;Yi, S;Wu, Fy;Ding, X;Wan, T;Xin, Sq	Zhejiang Univ;Ningbotech Univ;Ningbo Inst;Shandong Univ	Peoples R China	Shu, Zhenyu;Gao, Ling;Yi, Shun;Wu, Fangyu;Ding, Xin;Wan, Ting;Xin, Shiqing	Computer Science, Information Systems;Computer Science, Software Engineering;Computer Science, Theory & Methods	Computer Science	2	8	0	8	44	NOV	National Natural Science Foundation Of China [62172356, 61872321, 62272277];Zhejiang Provincial Natural Science Foundation Of China [Ly22F020026];Ningbo Major Special Projects Of The "Science And Technology Innovation 2025 [2020Z005, 2020Z007, 2021Z012, 2019B10128]	Yi, S (Corresponding Author), Ningbotech Univ, Sch Comp & Data Engn, Ningbo 315100, Peoples R China;Yi, S (Corresponding Author), Zhejiang Univ, Sch Mech Engn, Hangzhou 310027, Zhejiang, Peoples R China;Yi, S (Corresponding Author), Shandong Univ, Sch Comp Sci & Technol, Qingdao 315100, Shandong, Peoples R China.			Wos:001035785200025	10.1145/3597026	detecting points of interest is a fundamental problem in 3d shape analysis and can be beneficial to various tasks in multimedia processing. traditional learning-based detection methods usually rely on each vertex's geometric features to discriminate points of interest from other vertices. observing that points of interest are related to not only geometric features on themselves but also the geome…	Shu, Z	Shu, Z;Context-Aware 3D Points Of Interest Detection Via Spatial Attention Mechanism	51
2023	4	Control Of Batch Pulping Process Using Data-Driven Constrained Iterative Learning Control	Batch Processes;Dissolving Pulp Model;Kappa Number;Iterative Learning Control;Ltvp Model	Predictive Control;Digester Model;Optimization;Degradation;Tracking;Design	Computers & Chemical Engineering	Shibani, B;Ambure, P;Purohit, A;Suratia, P;Bhartiya, S	Grasim Ind Ltd;World Trade Ctr;Indian Inst Technol	India	Shibani, B;Ambure, Prathmesh;Purohit, Amit;Suratia, Preetsinh;Bhartiya, Sharad	Computer Science, Interdisciplinary Applications;Engineering, Chemical	Computer Science;Engineering	1	12	4	12	30	FEB	Missing Fields	Bhartiya, S (Corresponding Author), Indian Inst Technol, Dept Chem Engn, Mumbai, India.			Wos:000920204300001	10.1016/J.Compchemeng.2023.108138	kraft pulping uses steam and chemicals to convert wood chips to pulp, used for production of paper, textile fiber or other cellulosic materials, in large batch or continuous digesters. batch digesters owe their widespread use to lower capex as well as flexibility of operation that can easily accommodate changes in feedstock or product grades. however, control of batch pulping process is challengi…	Shibani, B	Shibani, B;Control Of Batch Pulping Process Using Data-Driven Constrained Iterative Learning Control	314
2023	7	Creativity And Sustainable Design Of Wickerwork Handicraft Patterns Based On Artificial Intelligence	Sustainable Design;Deep Convolutional Neural Network;Dcgan;Wickerwork Handicraft Patterns	Rough Set-Theory;Customer Satisfaction;Kanos Model;Product;Integration;Construct	Sustainability	Wang, Tx;Ma, Zq;Yang, L	Anhui Univ;Anhui Jianzhu Univ	Peoples R China	Wang, Tianxiong;Ma, Zhiqi;Yang, Liu	Green & Sustainable Science & Technology;Environmental Sciences;Environmental Studies	Science & Technology - Other Topics;Environmental Sciences & Ecology	33	122	7	122	59	JAN	Anhui Province Quality Engineering Teaching And Research Project [2021Jyxm0082];Anhui University Talent Introduction Research Start-Up Funding Project [S020318019];Anhui University Quality Engineering Project [2022Xjzlgc214]	Wang, Tx (Corresponding Author), Anhui Univ, Sch Art, Hefei 230601, Peoples R China.			Wos:000927760200001	10.3390/Su15021574	protecting and inheriting local traditional handicrafts and developing them into characteristic handicraft industries plays a certain role in maintaining social harmony and stability. this study proposes an innovative design method for wickerwork patterns to achieve the sustainable development of wickerwork handicraft culture. in order to accurately grasp the emotional perception law of wickerwor…	Wang, Tx	Wang, Tx;Creativity And Sustainable Design Of Wickerwork Handicraft Patterns Based On Artificial Intelligence	220
2023	0	Customized Product Configuration Rule Intelligent Extraction And Dynamic Updating Method Based On The Least Recently Used Dynamic Decision Tree	Artificial Intelligence;Computer-Aided Design;Data-Driven Design;Design For Manufacturing;Design Methodology	Design;Classification;Technology;Framework;System	Journal Of Mechanical Design	Wang, Zl;Ge, Wq;Qiu, Lm;Zhang, Sy;Zhou, Jl;Hu, Kr;Fang, Ny	Zhejiang Univ;Zhejiang Univ Technol	Peoples R China	Wang, Zili;Ge, Wenqi;Qiu, Lemiao;Zhang, Shuyou;Zhou, Jiali;Hu, Kerui;Fang, Naiyu	Engineering, Mechanical	Engineering	8	22	0	22	37	MAY 1	National Natural Science Foundation Of China [51905476];"Pioneer" And "Leading Goose" R&D Program Of Zhejiang, China [2022C01178];Public Welfare Technology Application Projects Of Zhejiang Province Of China [Lgg22E050008];Key Scientific And Technological Projects Keqiao District Shaoxing City Of China [2021Jbgs205]	Wang, Zl (Corresponding Author), Zhejiang Univ, State Key Lab Fluid Power & Mechatron Syst, Hangzhou 310027, Peoples R China.			Wos:000965671400012	10.1115/1.4056498	in the traditional customized product (cp) configuration design system, the configuration rules in the database usually rely on the manual input and maintenance of experienced designers. in complex product design, configuration rules are numerous, complex, and difficult to understand. the way of human input based on experience consumes plenty of resources, which are strictly limited by experience…	Wang, Zl	Wang, Zl;Customized Product Configuration Rule Intelligent Extraction And Dynamic Updating Method Based On The Least Recently Used Dynamic Decision Tree	344
[truncated: 77 more rows]
